# Supplementary material for: A second update on mapping the human genetic architecture of COVID-19
Source: Springer Nature journal article supplement (doi:10.1038/s41586-023-06355-3), 2023-09-06

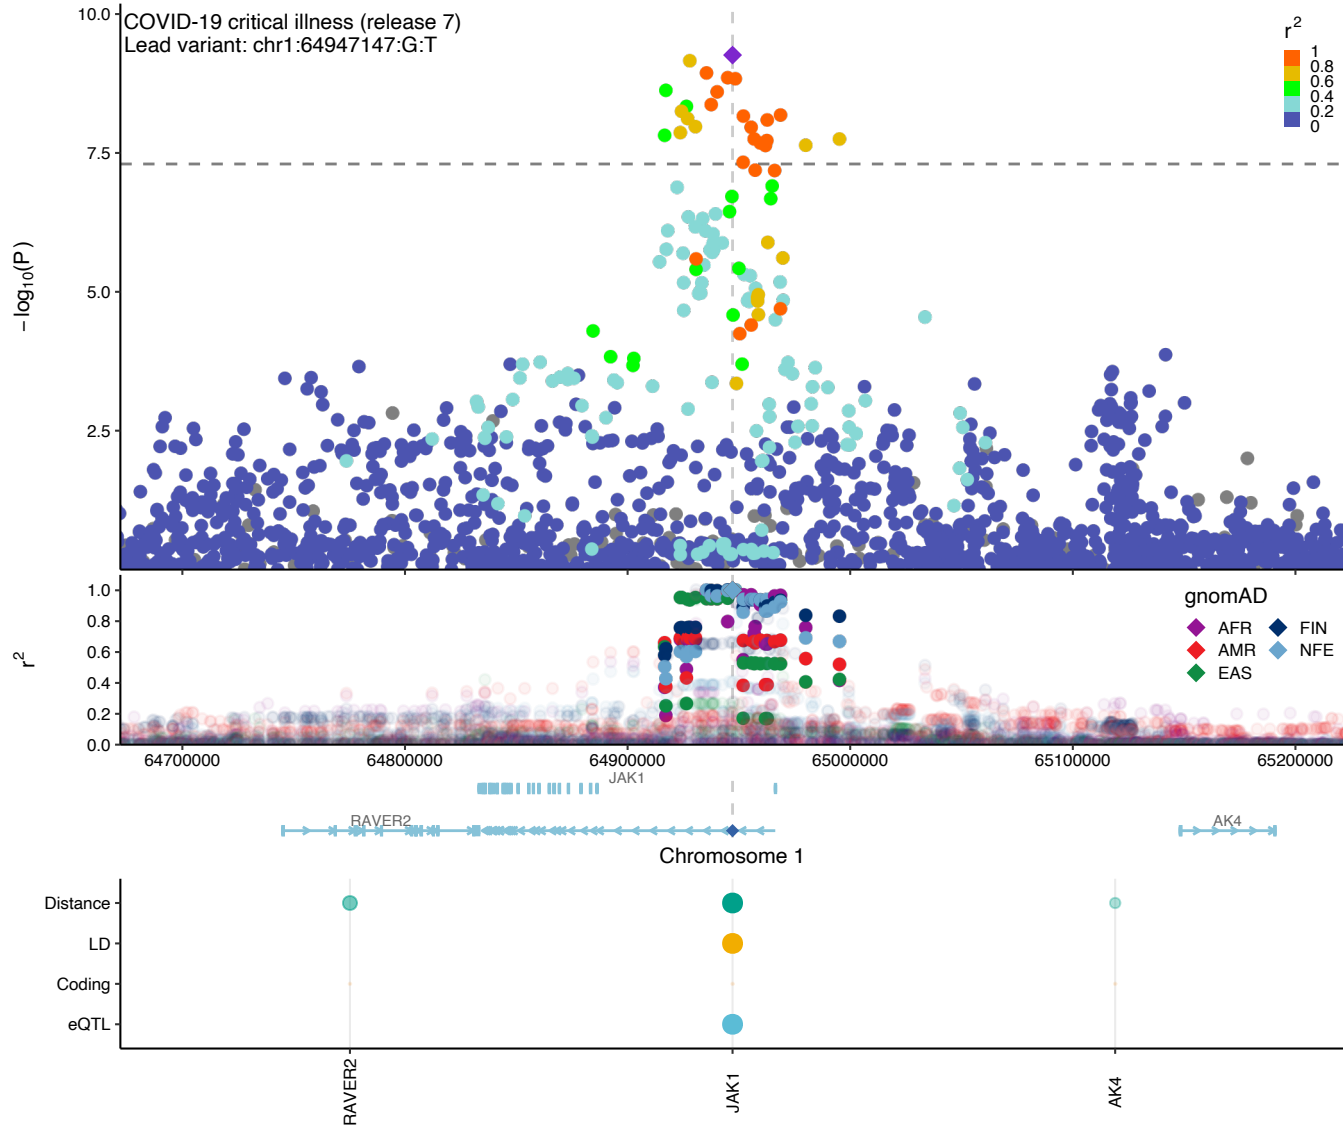

COVID-19 critical illness (release 7)  
Lead variant: chr2:60480453:A:G

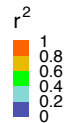

$-\log_{10}(P)$

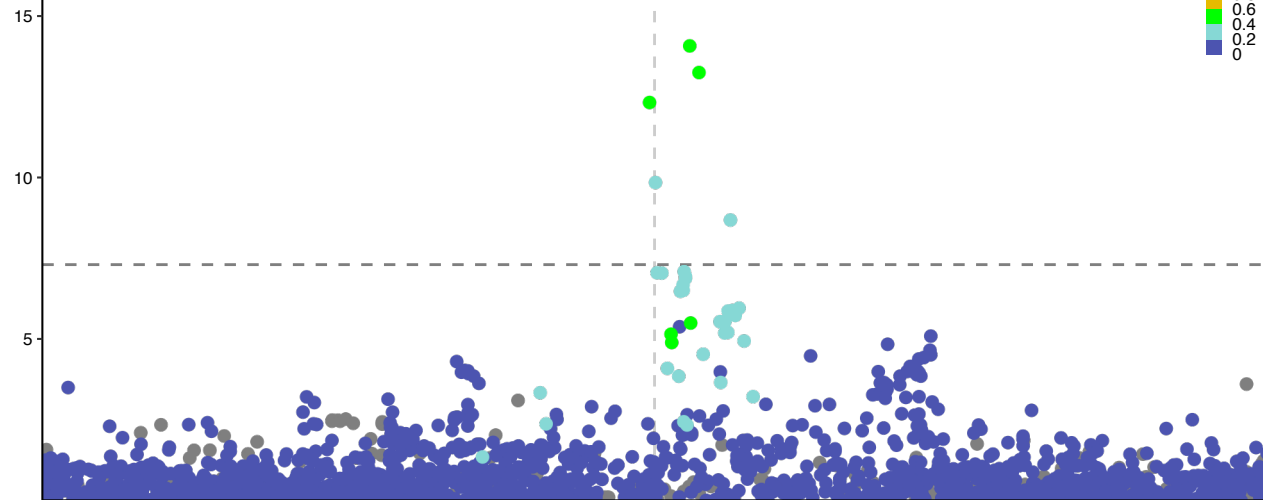

$r^2$

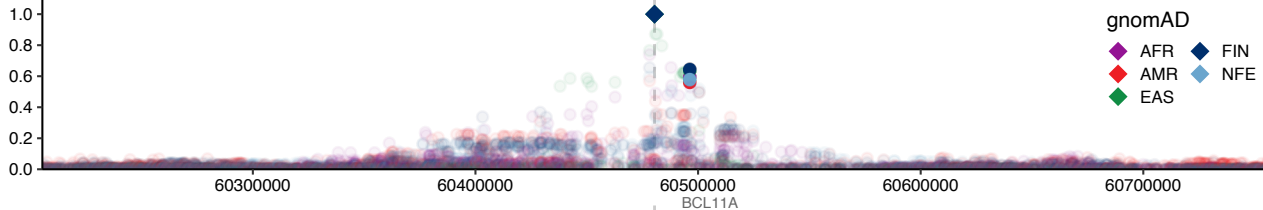

gnomAD

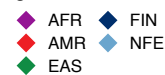

BCL11A

Chromosome 2

Distance  
LD  
Coding  
eQTL

BCL11A



COVID-19 critical illness (release 7)  
Lead variant: chr4:105897896:G:A



$-\log_{10}(P)$

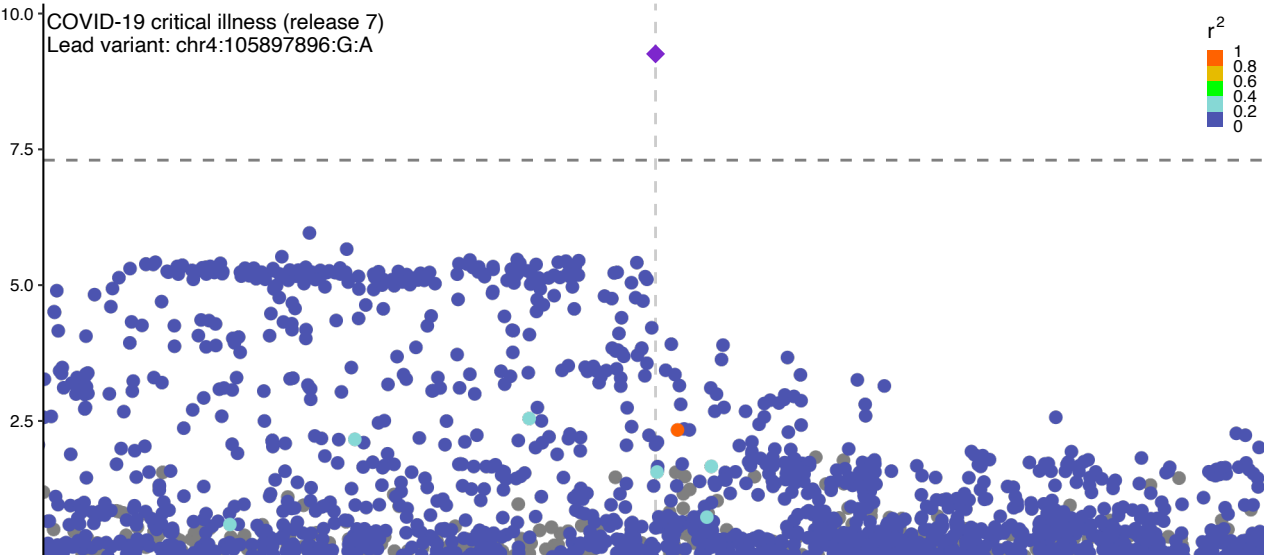

$r^2$

gnomAD

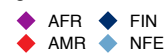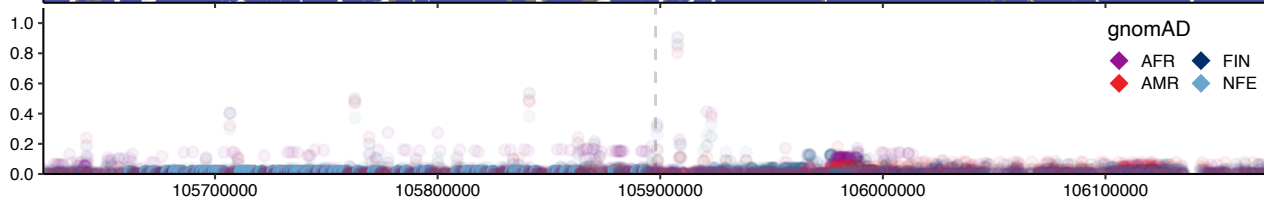

ARHGEF38  
INTS12

GSTCD

NPNT

TBCK

Chromosome 4

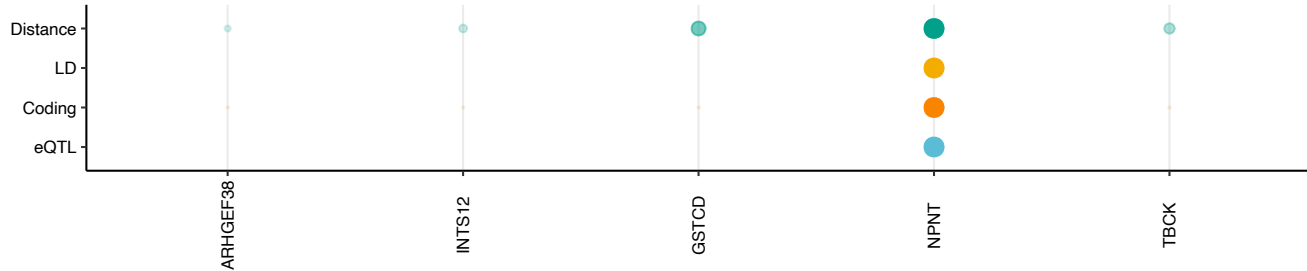

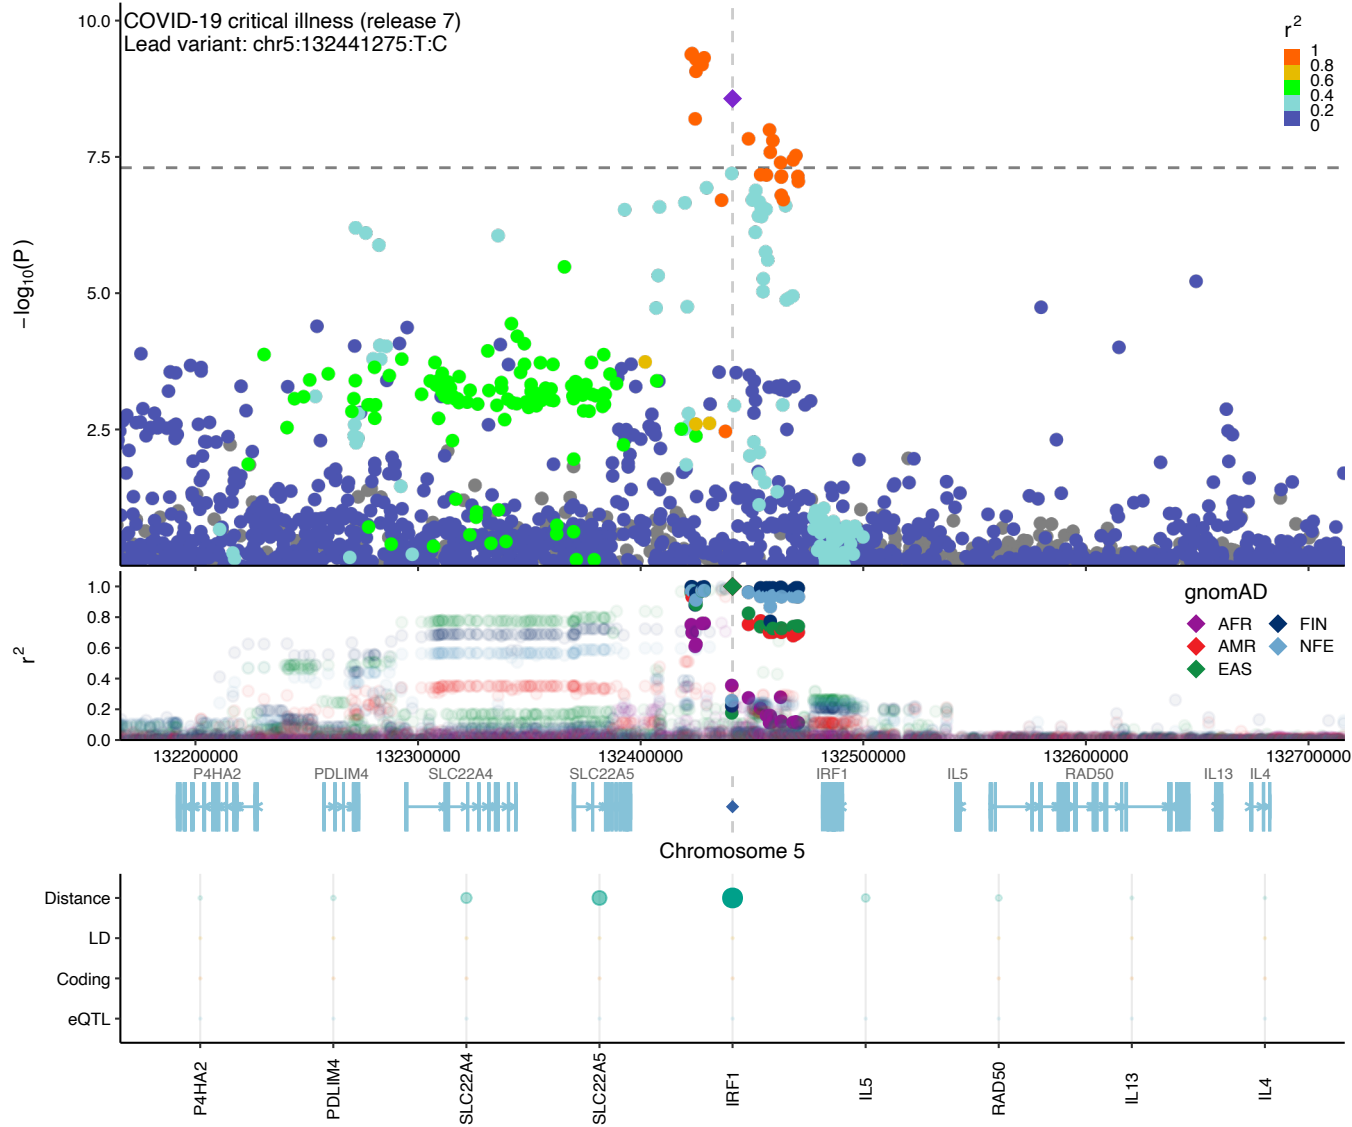

COVID-19 critical illness (release 7)  
Lead variant: chr6:29947491:C:T

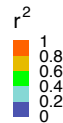

$-\log_{10}(P)$

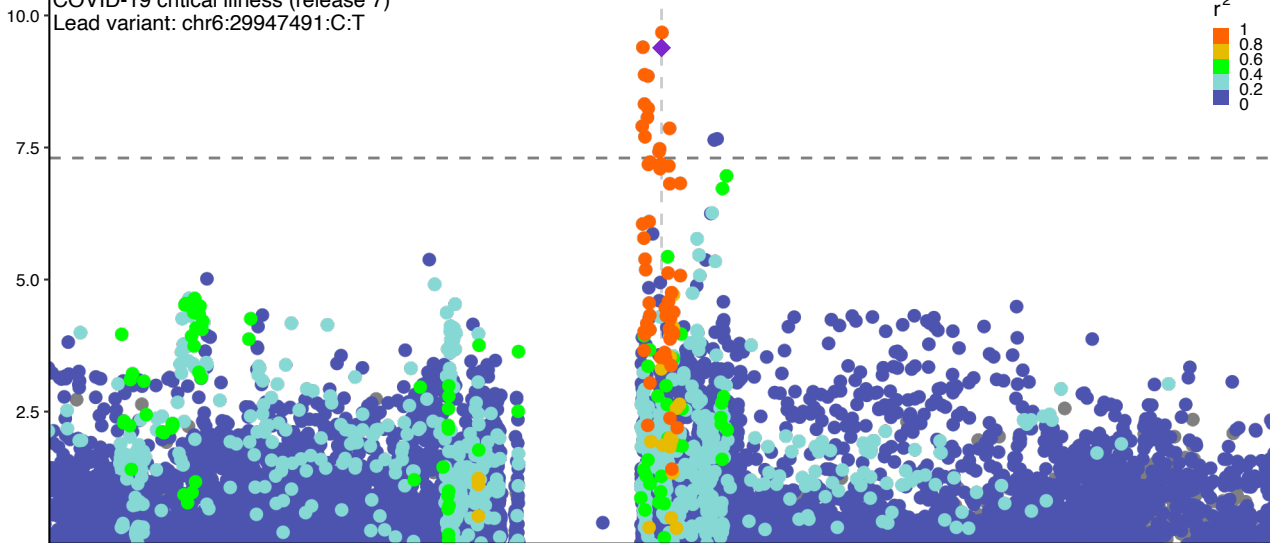

$r^2$

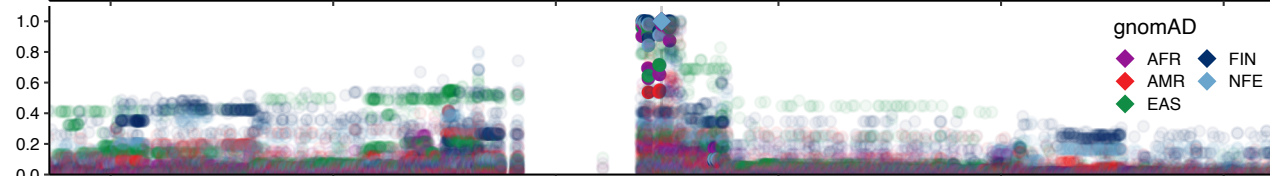

gnomAD

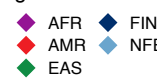

Chromosome 6

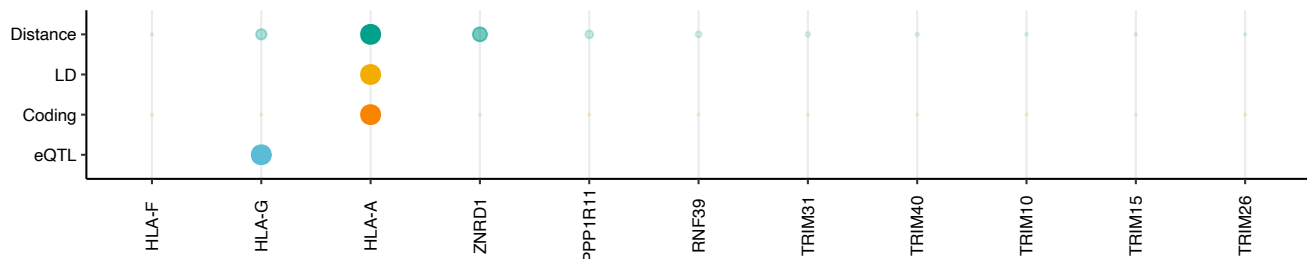

COVID-19 critical illness (release 7)  
Lead variant: chr6:31182658:A:G

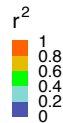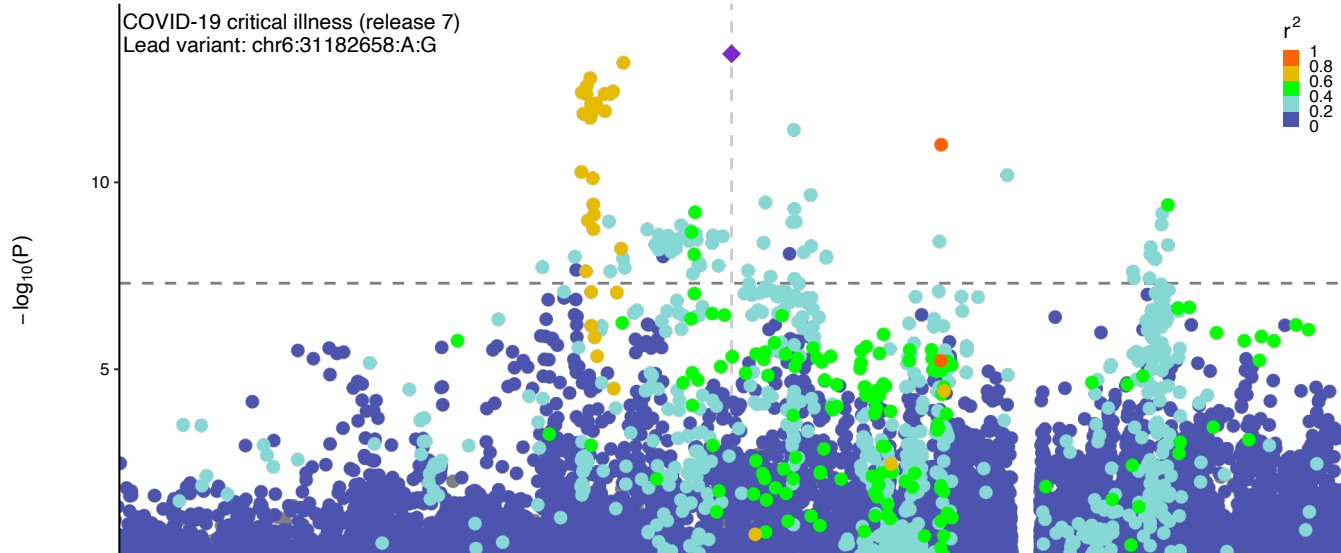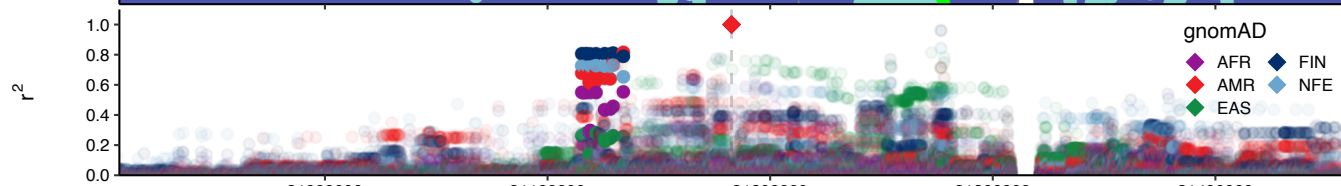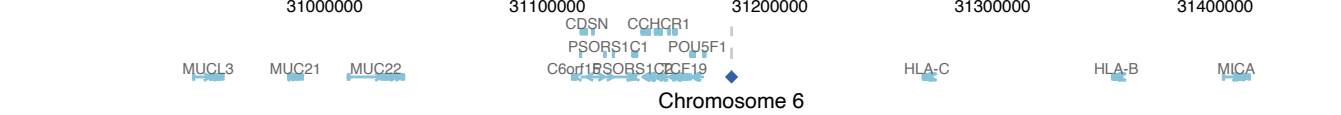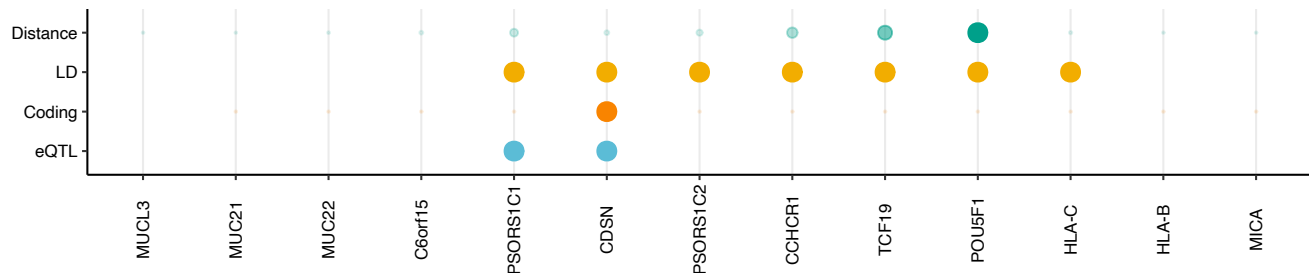

COVID-19 critical illness (release 7)  
Lead variant: chr6:41520640:G:A

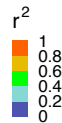

$-\log_{10}(P)$

$r^2$

Distance

LD

Coding

eQTL

TREM1

NCR2

Chromosome 6

FOXP4

TFEB

TFEB

PGC

TFEB

FRS3

gnomAD

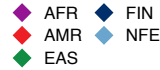

PGC

FRS3

COVID-19 critical illness (release 7)  
Lead variant: chr7:75622276:CA:C

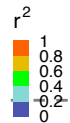

$-\log_{10}(P)$

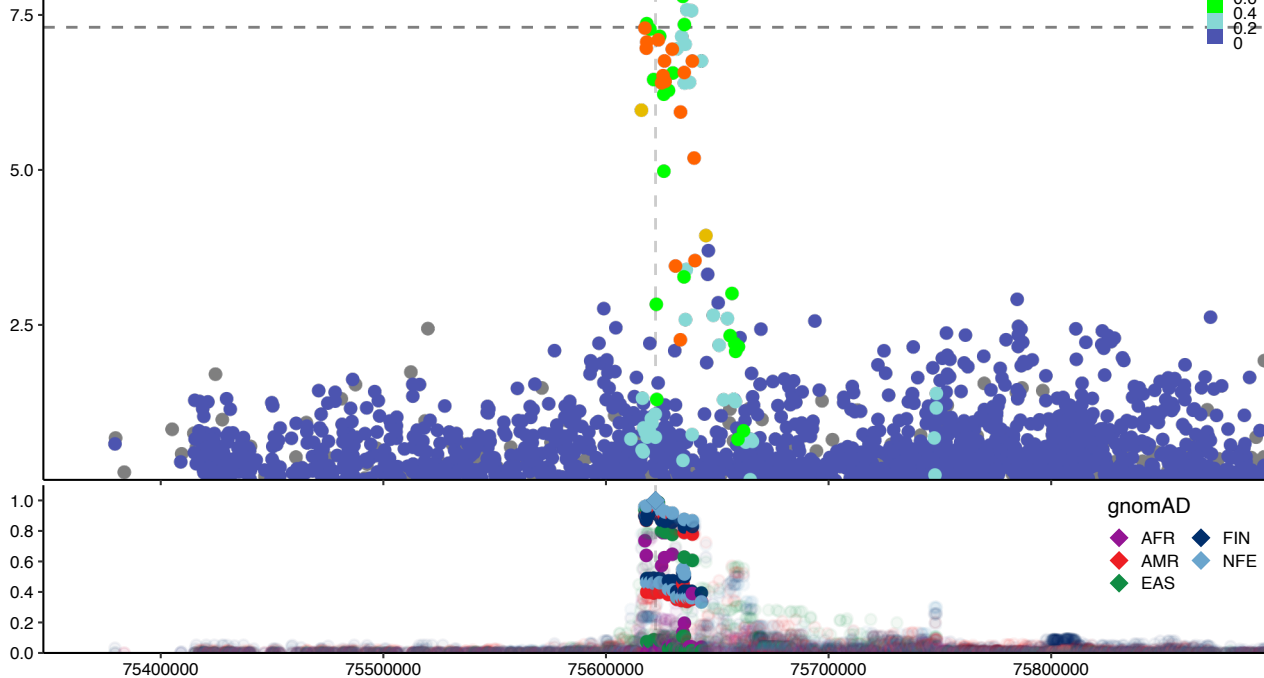

SPDYE5

TRIM73

POM121C

HIP1

CCL26

CCL24

Chromosome 7

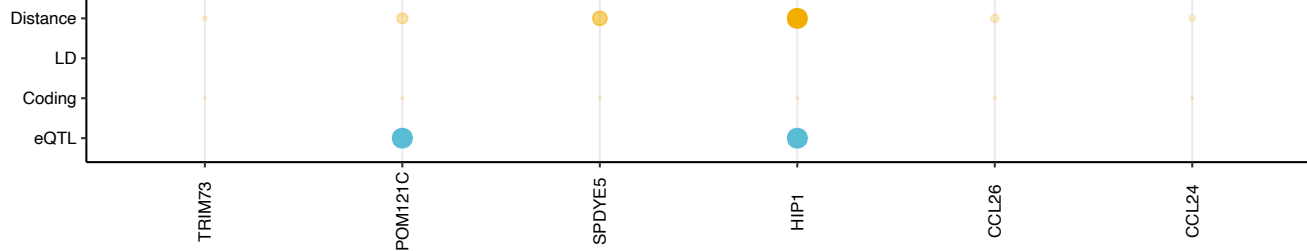

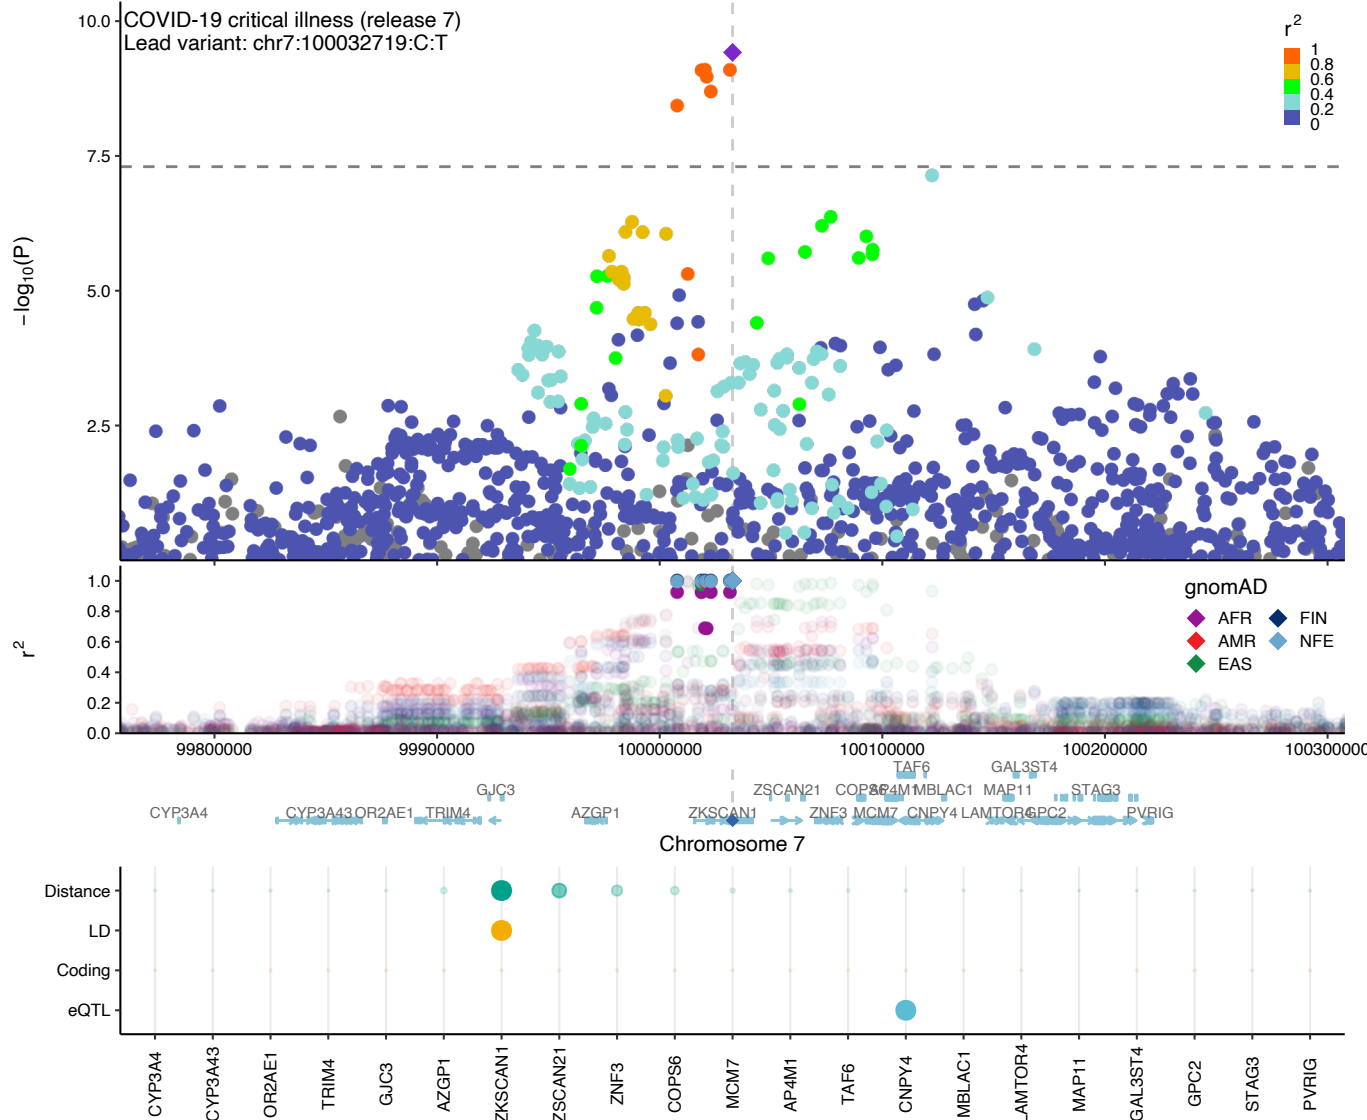

COVID-19 critical illness (release 7)  
Lead variant: chr8:60513412:G:A

$r^2$   
1  
0.8  
0.6  
0.4  
0.2  
0

$-\log_{10}(P)$

7.5

5.0

2.5

$r^2$

1.0

0.8

0.6

0.4

0.2

0.0

gnomAD

AFR  
AMR  
EAS  
FIN  
NFE

60300000

60400000

60500000

60600000

60700000

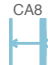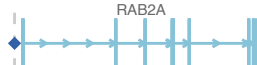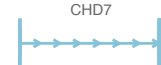

Chromosome 8

Distance  
LD  
Coding  
eQTL

CA8

RAB2A

CHD7



COVID-19 critical illness (release 7)  
Lead variant: chr9:21206606:C:G

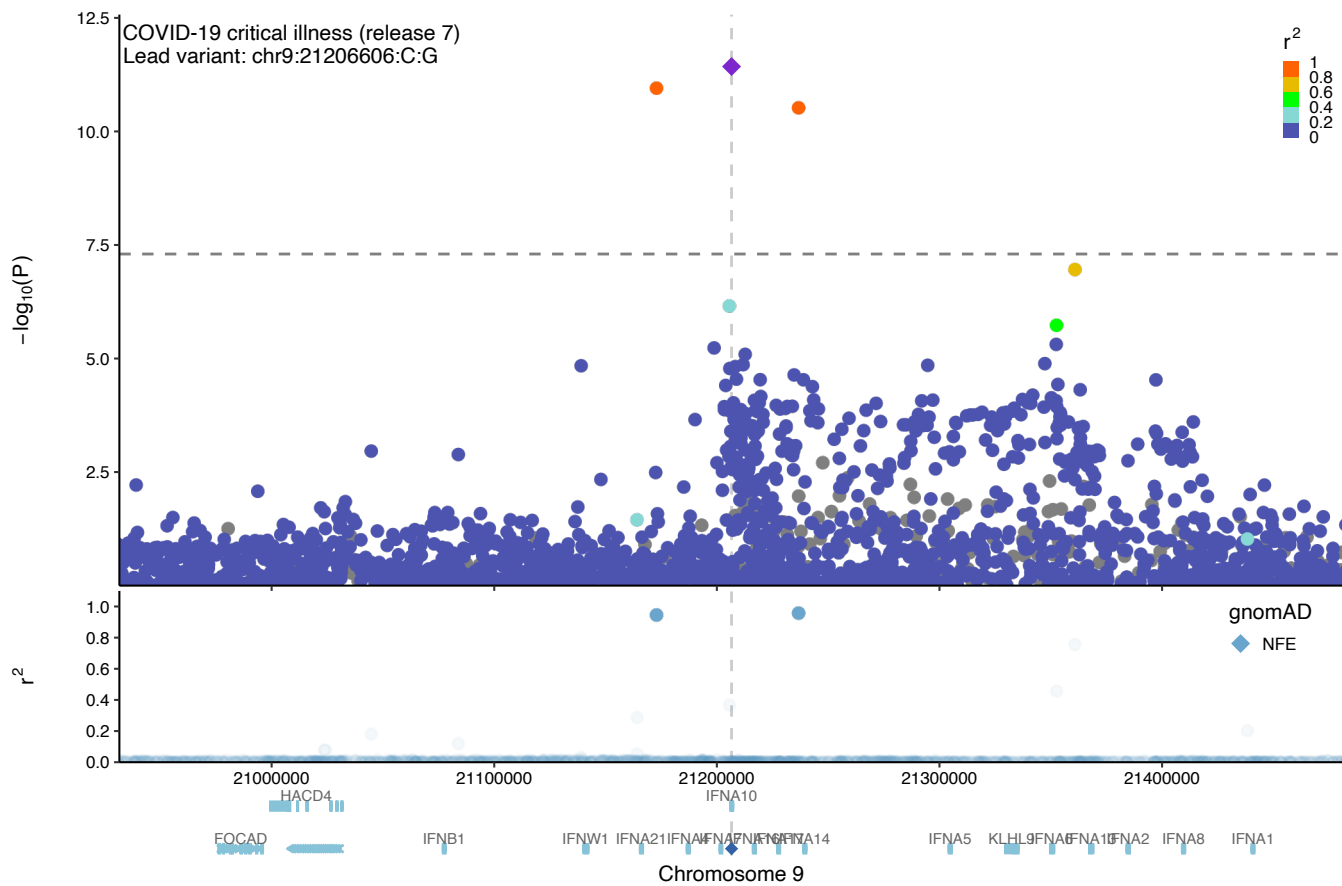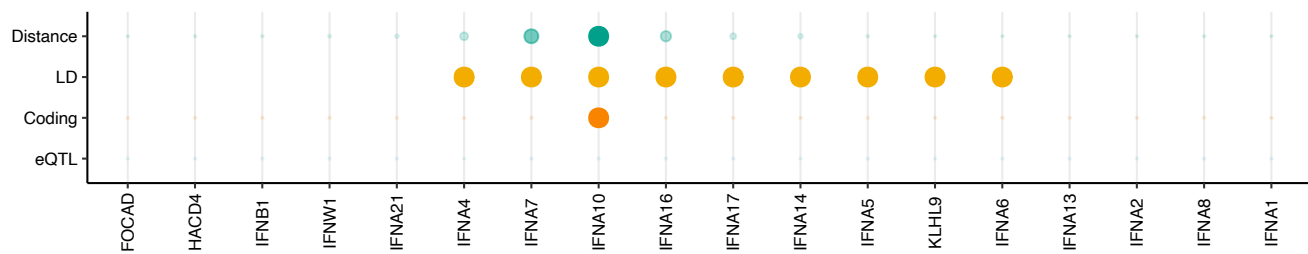

COVID-19 critical illness (release 7)  
Lead variant: chr9:133273813:C:T



$-\log_{10}(P)$

$r^2$

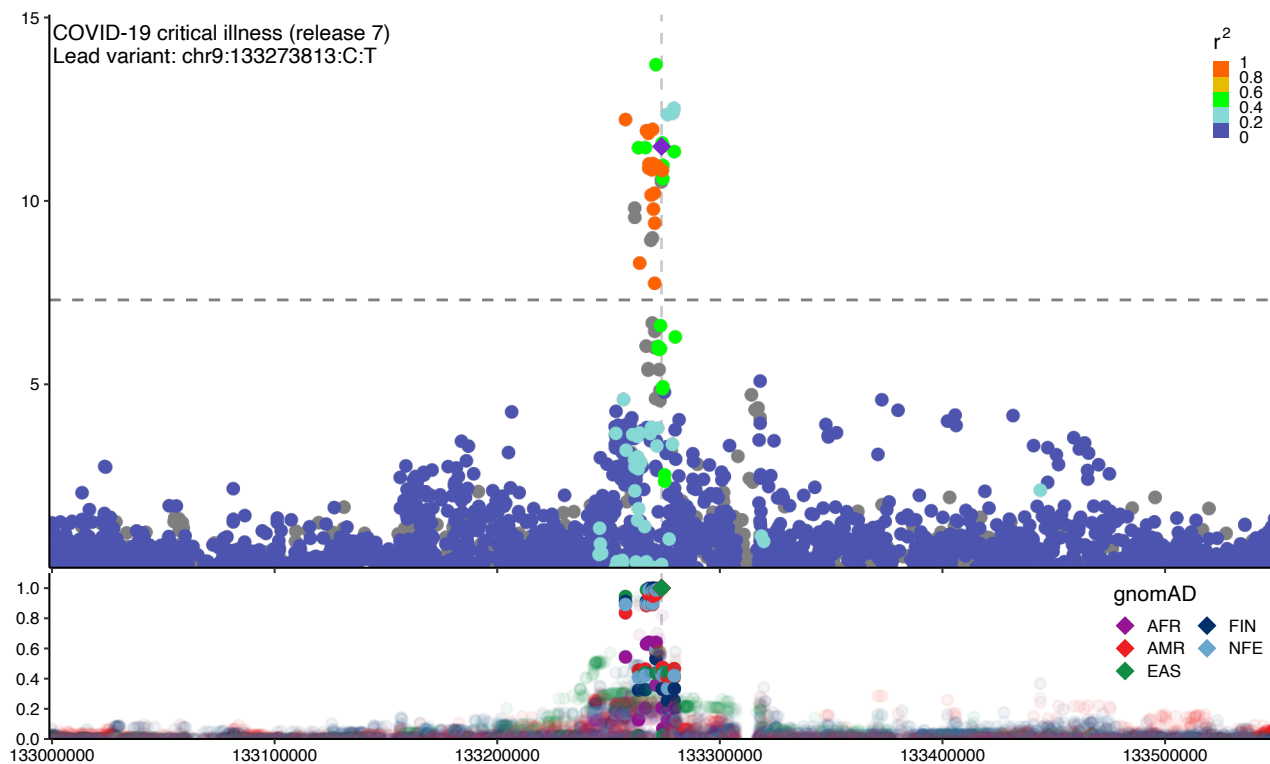

Chromosome 9

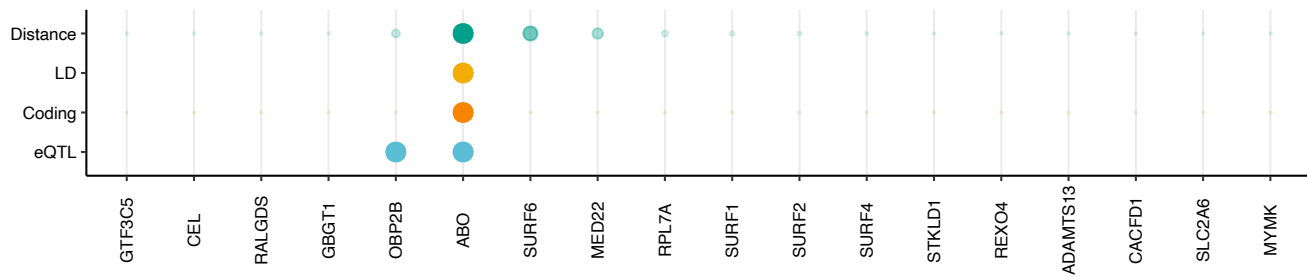

COVID-19 critical illness (release 7)  
Lead variant: chr11:1219991:G:T

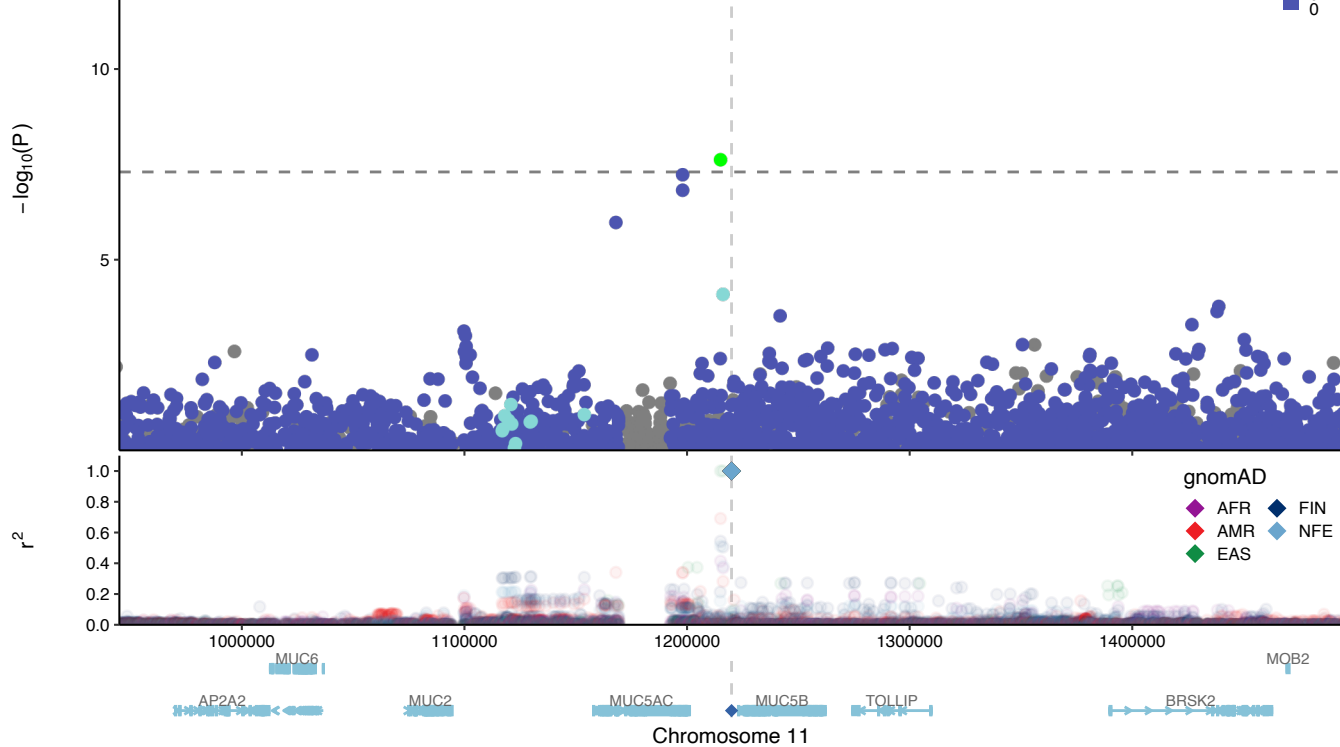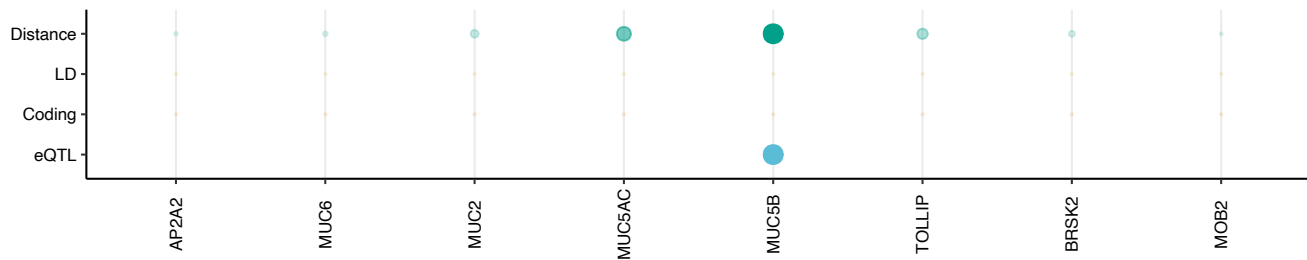

COVID-19 critical illness (release 7)  
Lead variant: chr11:34480495:C:T



$-\log_{10}(P)$

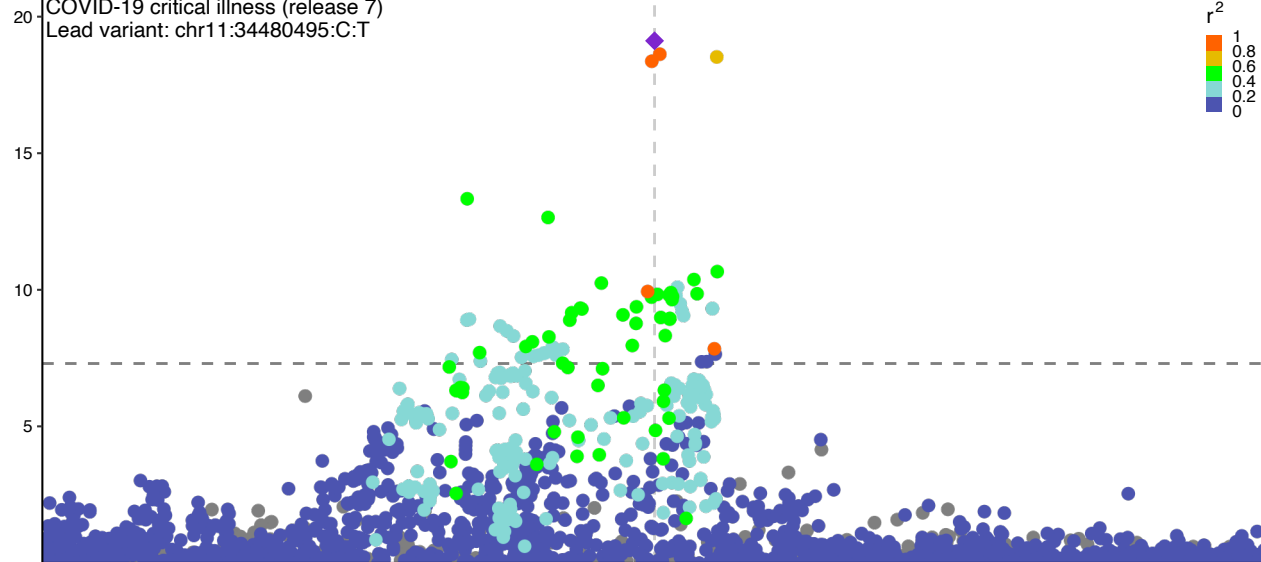

$r^2$

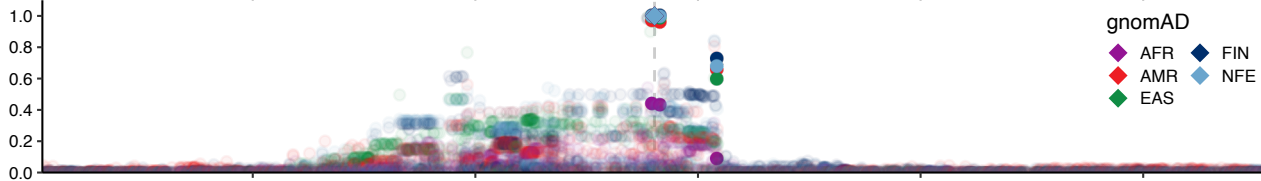

ABTB2

CAT

ELF5

EHF

Chromosome 11

Distance

LD

Coding

eQTL

ABTB2

CAT

ELF5

EHF

COVID-19 critical illness (release 7)  
Lead variant: chr12:112922758:T:C

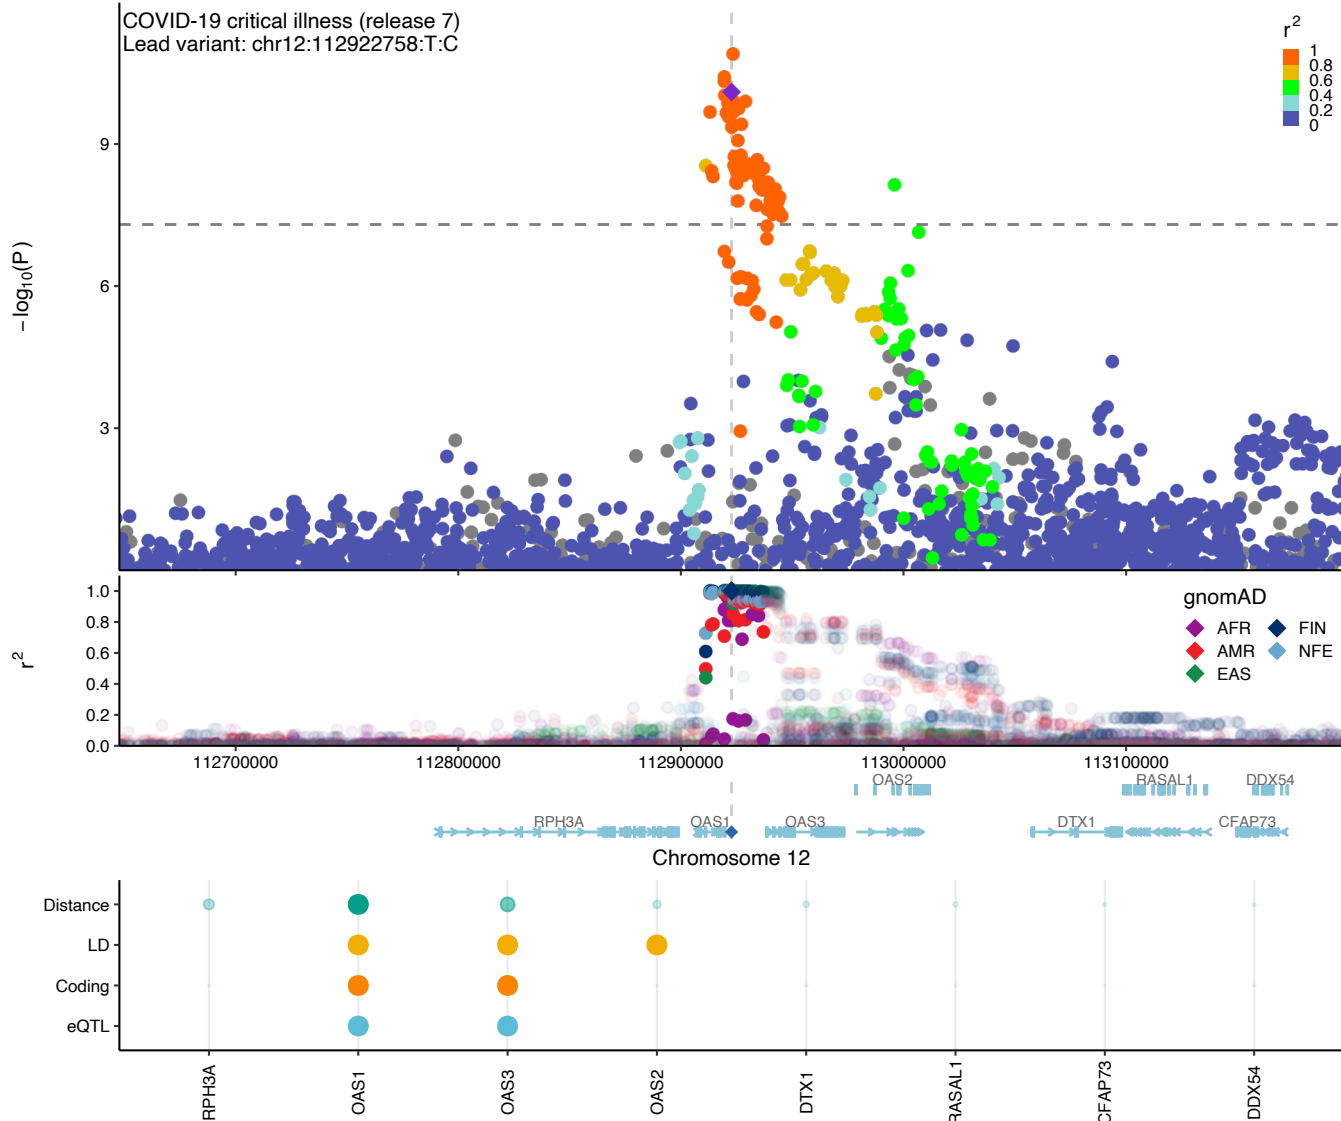

COVID-19 critical illness (release 7)  
Lead variant: chr12:132565387:T:C



$-\log_{10}(P)$

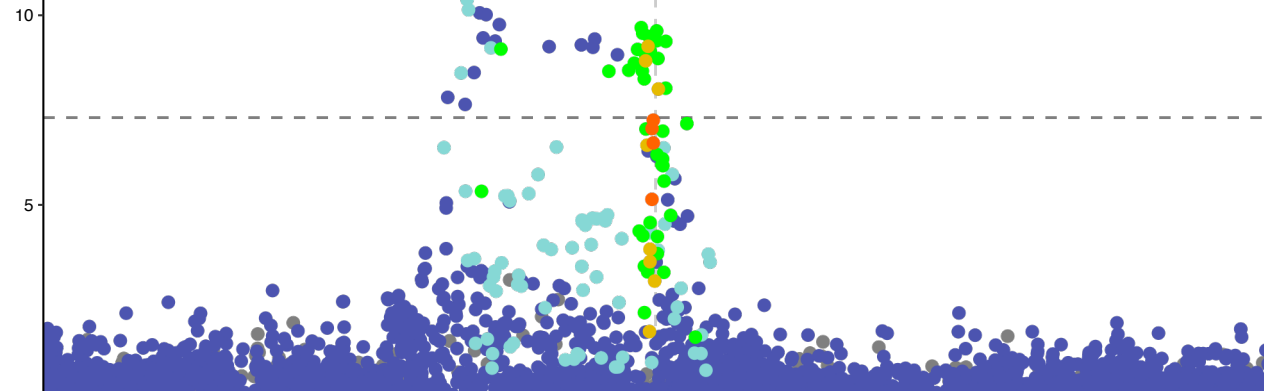

$r^2$

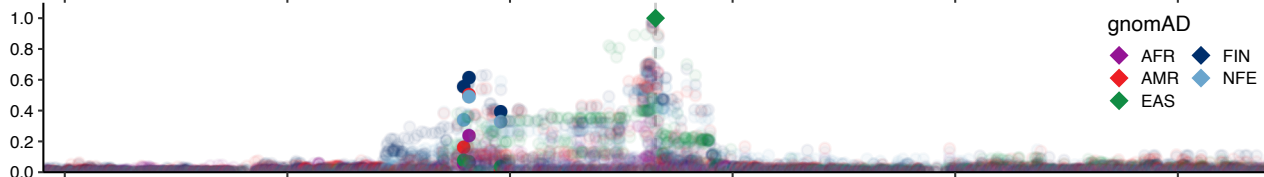

132300000 132400000 132500000 132600000 132700000 132800000

GALNT9

FBRSL1

P2RX2

LRCOL1

POLE

PXMP2

PGAM5

ANKLE2

GOLGA3

Chromosome 12

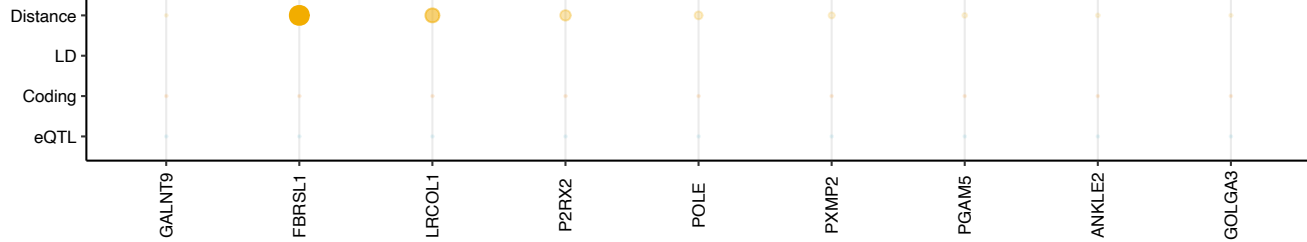

COVID-19 critical illness (release 7)  
Lead variant: chr13:112881427:C:T

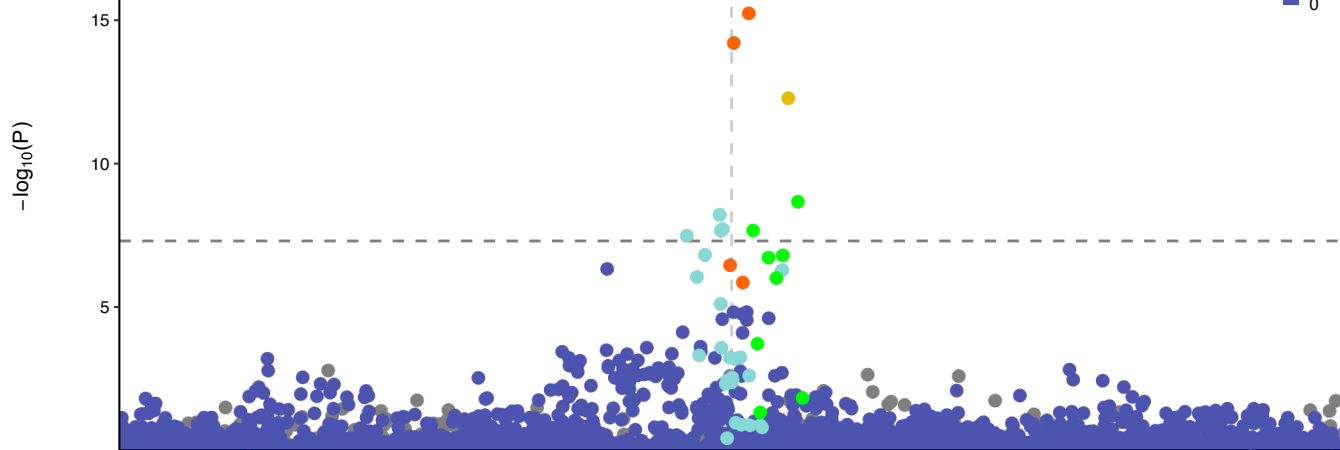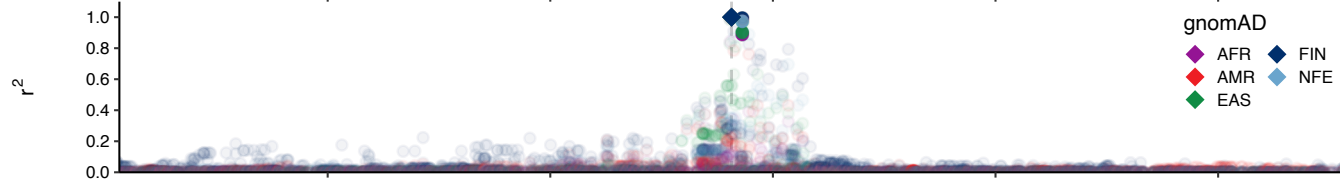

gnomAD

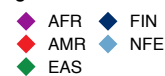

112700000 112800000 112900000 113000000 113100000

ATP11A

MCF2L

F10

Chromosome 13

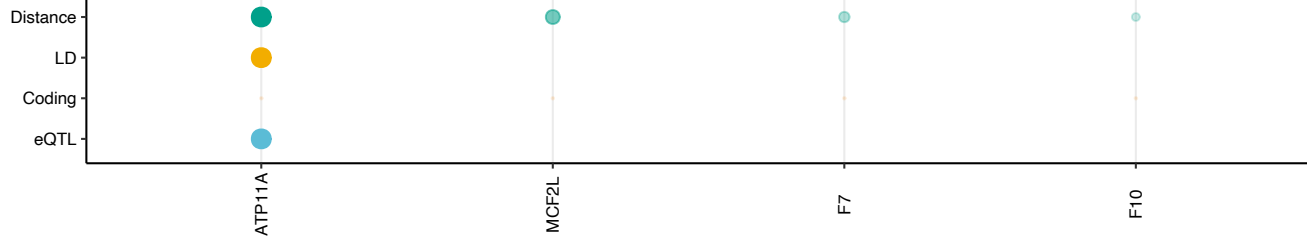

COVID-19 critical illness (release 7)  
Lead variant: chr16:89196249:G:A

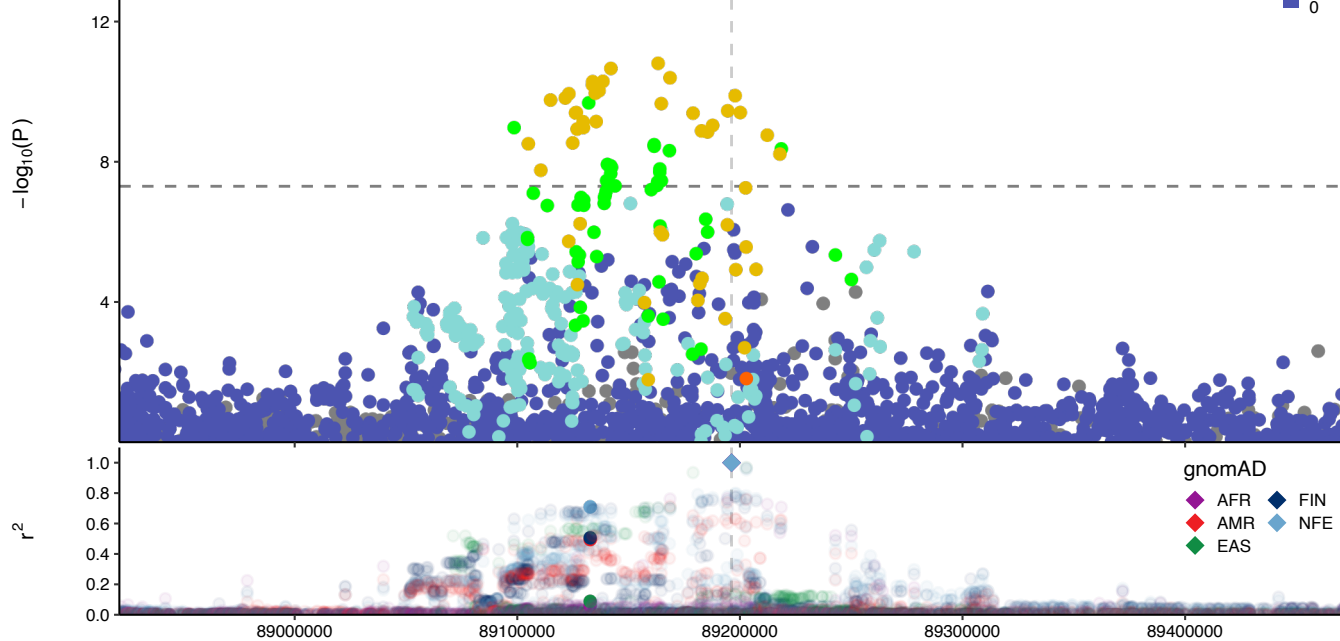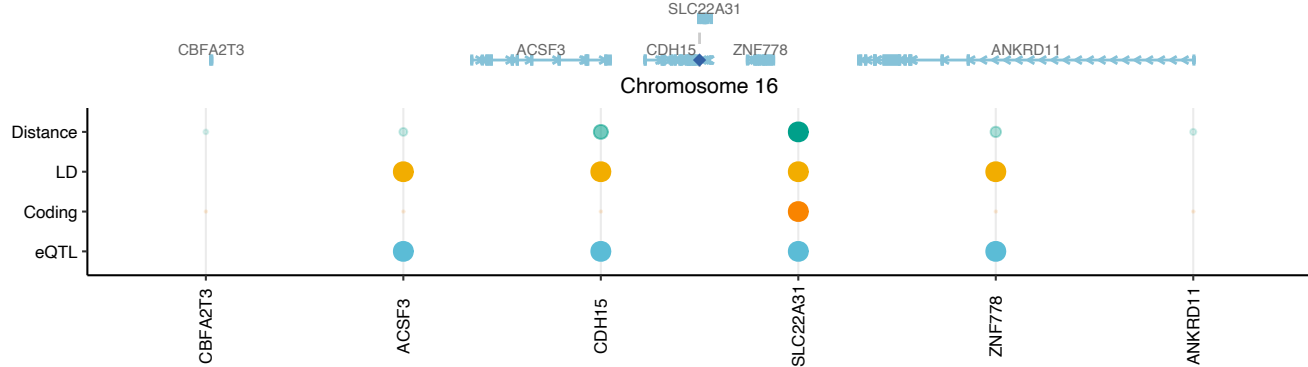



COVID-19 critical illness (release 7)  
Lead variant: chr17:45635098:G:A



$-\log_{10}(P)$

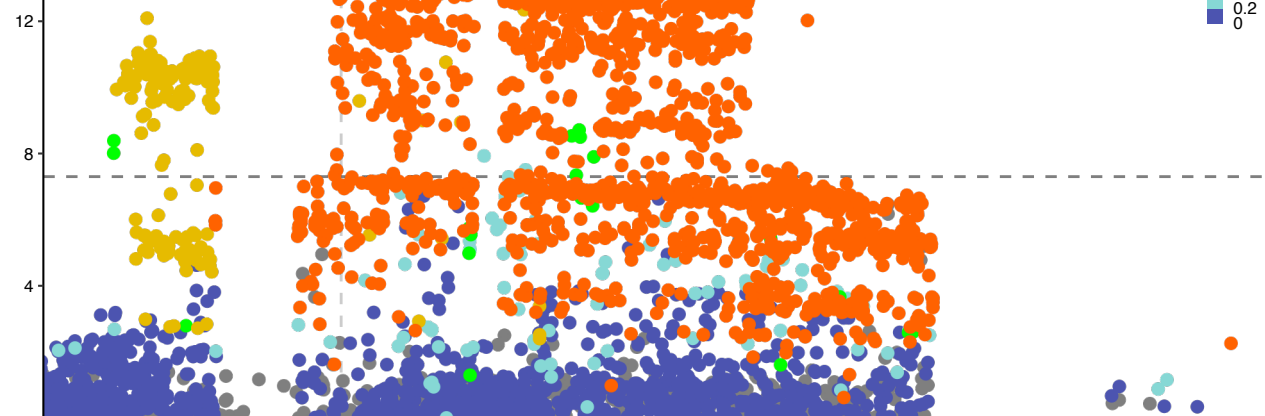

$r^2$

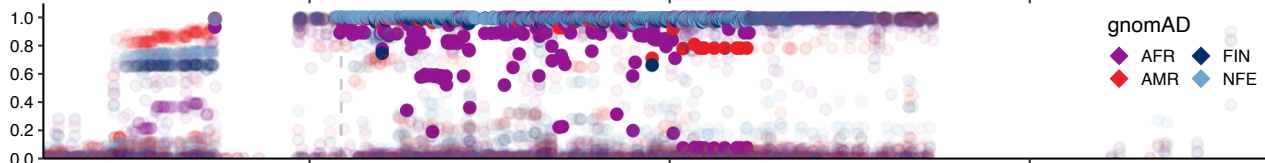

gnomAD

- AFR
- AMR
- FIN
- NFE

45600000 46000000 46400000

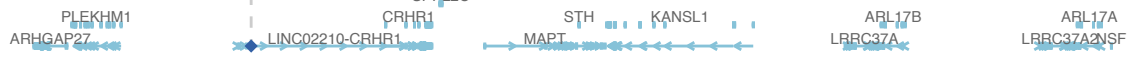

Chromosome 17

Distance  
LD  
Coding  
eQTL

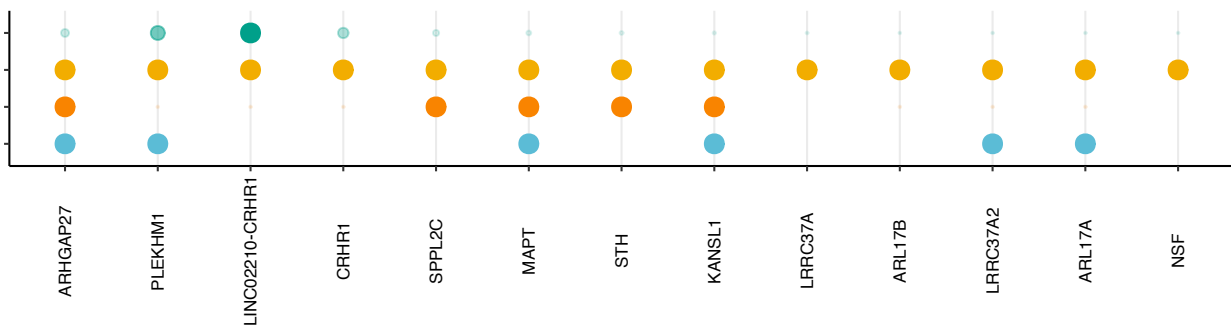

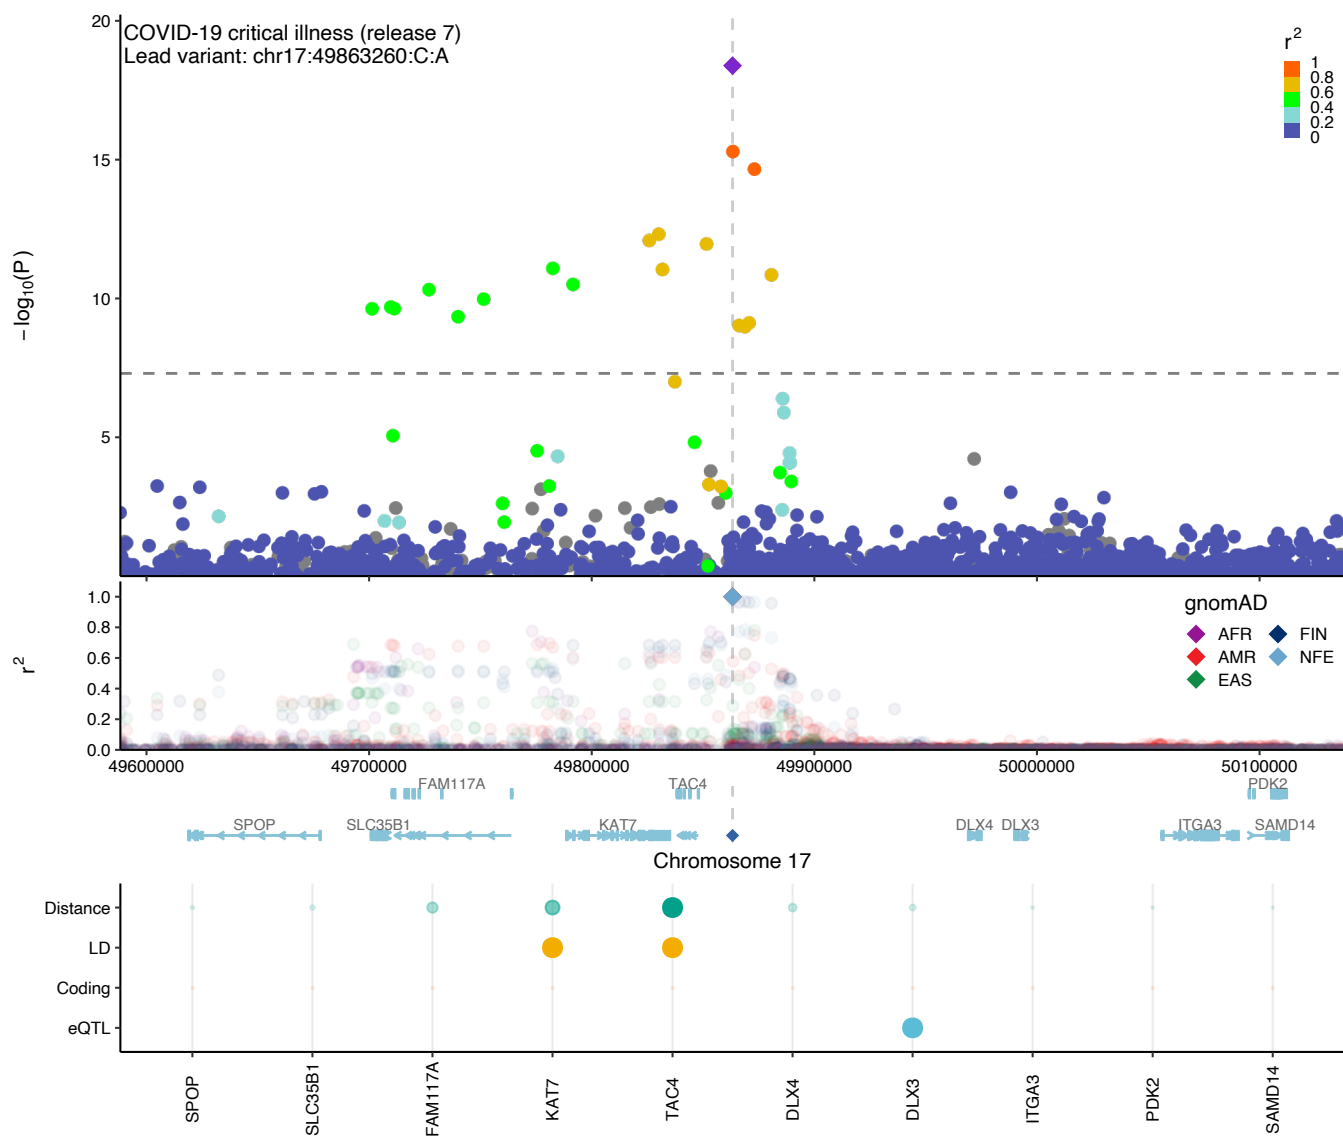

COVID-19 critical illness (release 7)  
Lead variant: chr19:4717660:A:G

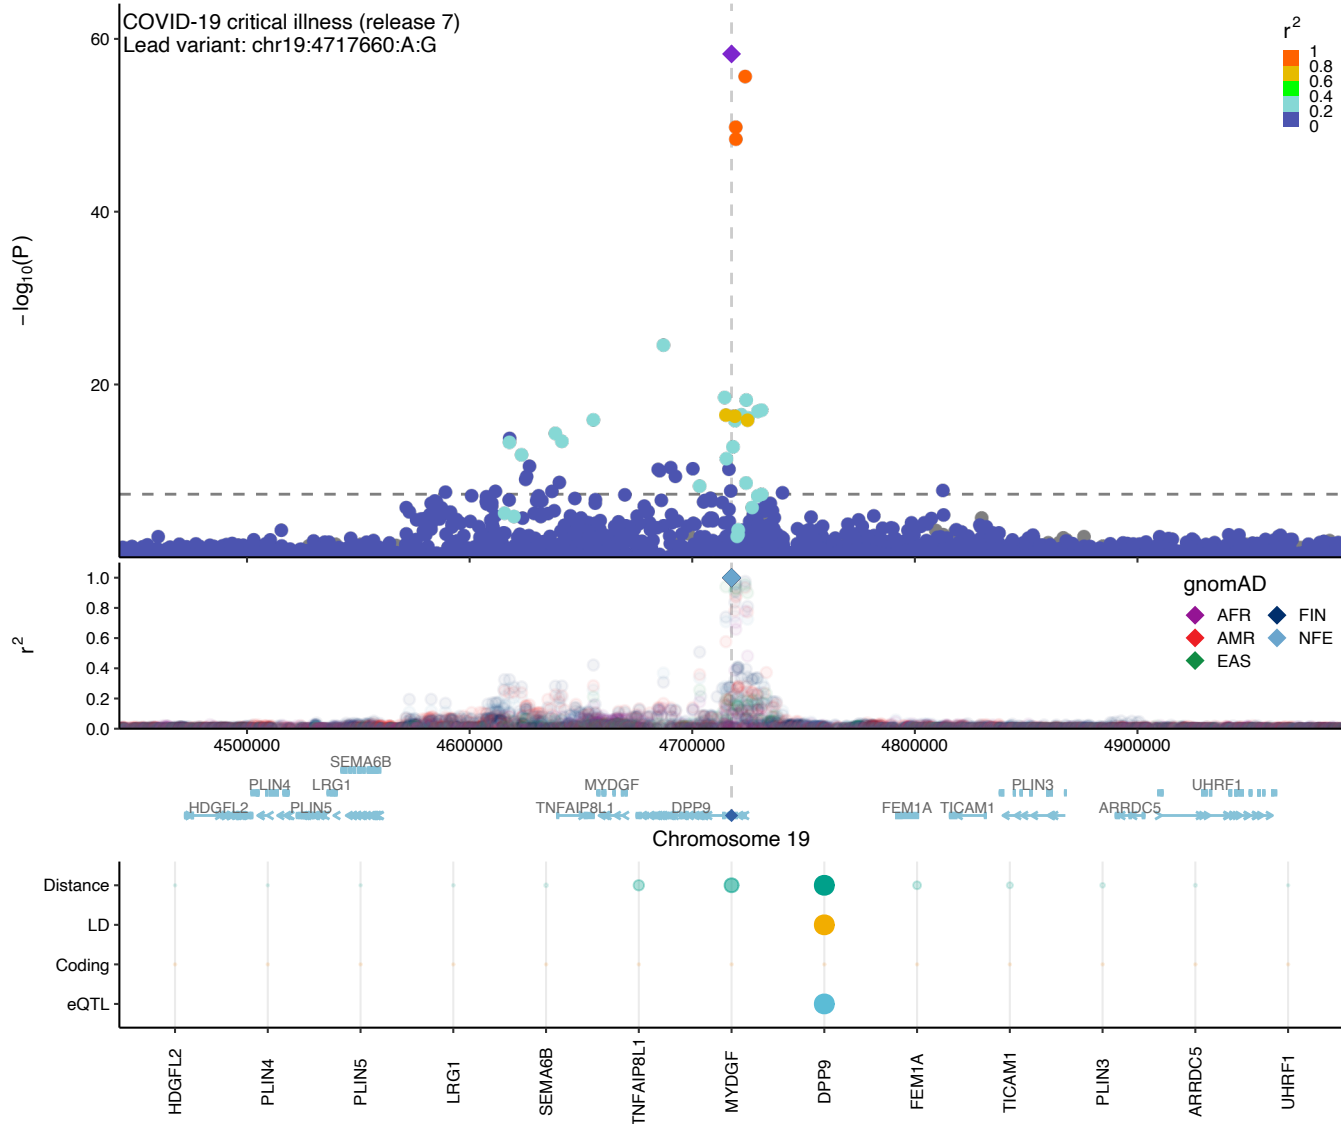

COVID-19 critical illness (release 7)  
Lead variant: chr19:10352442:G:C

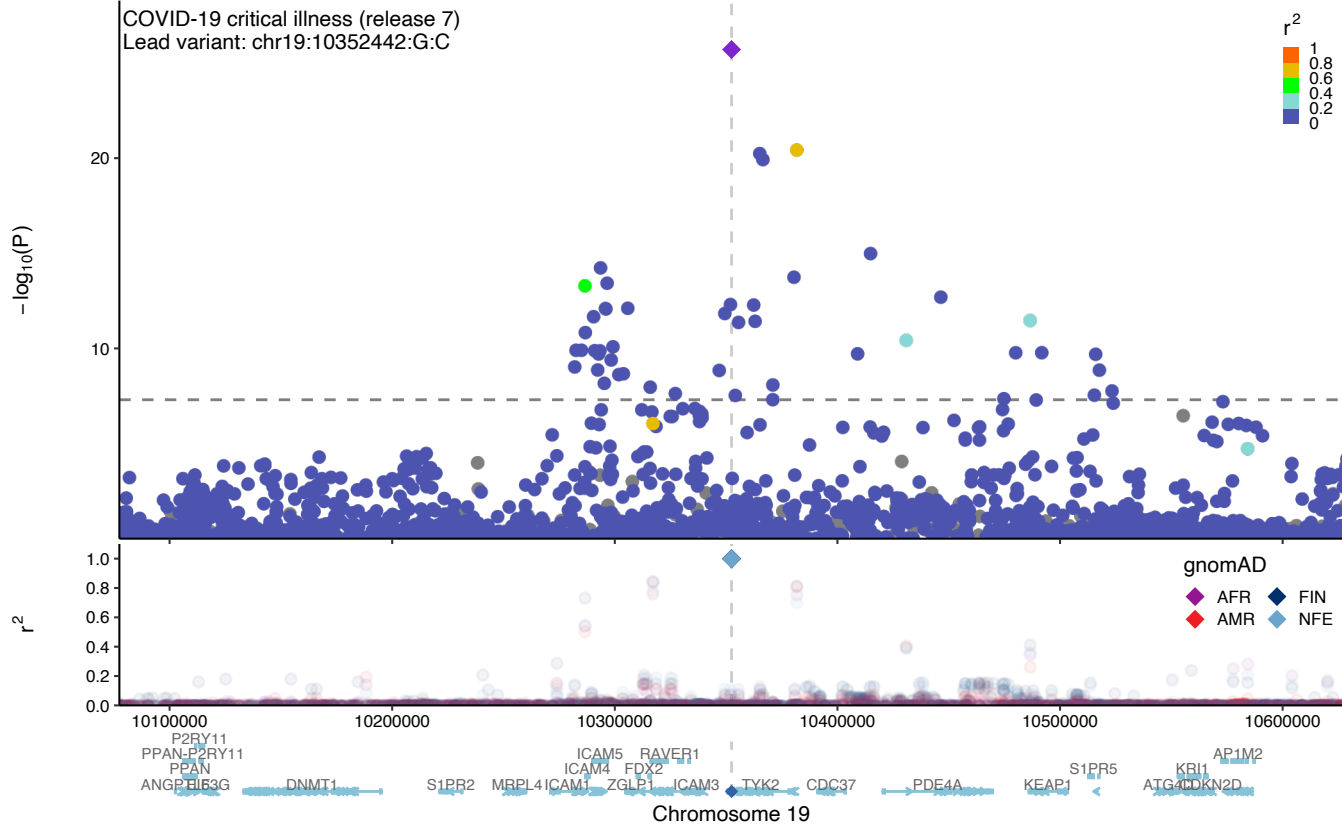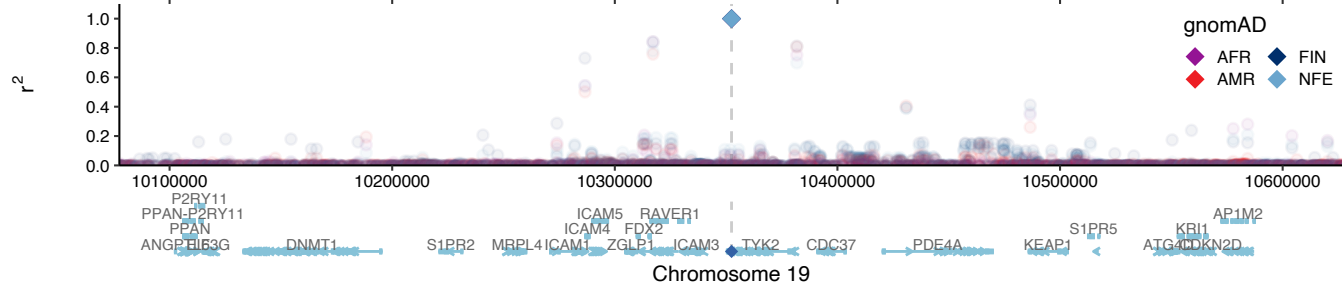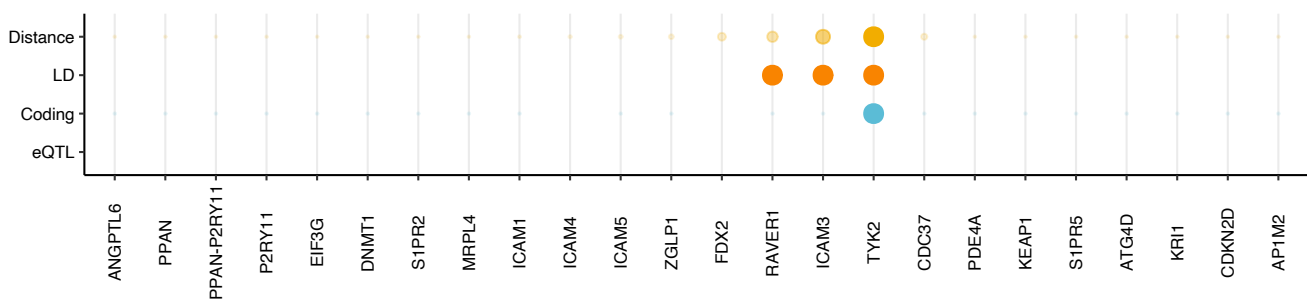

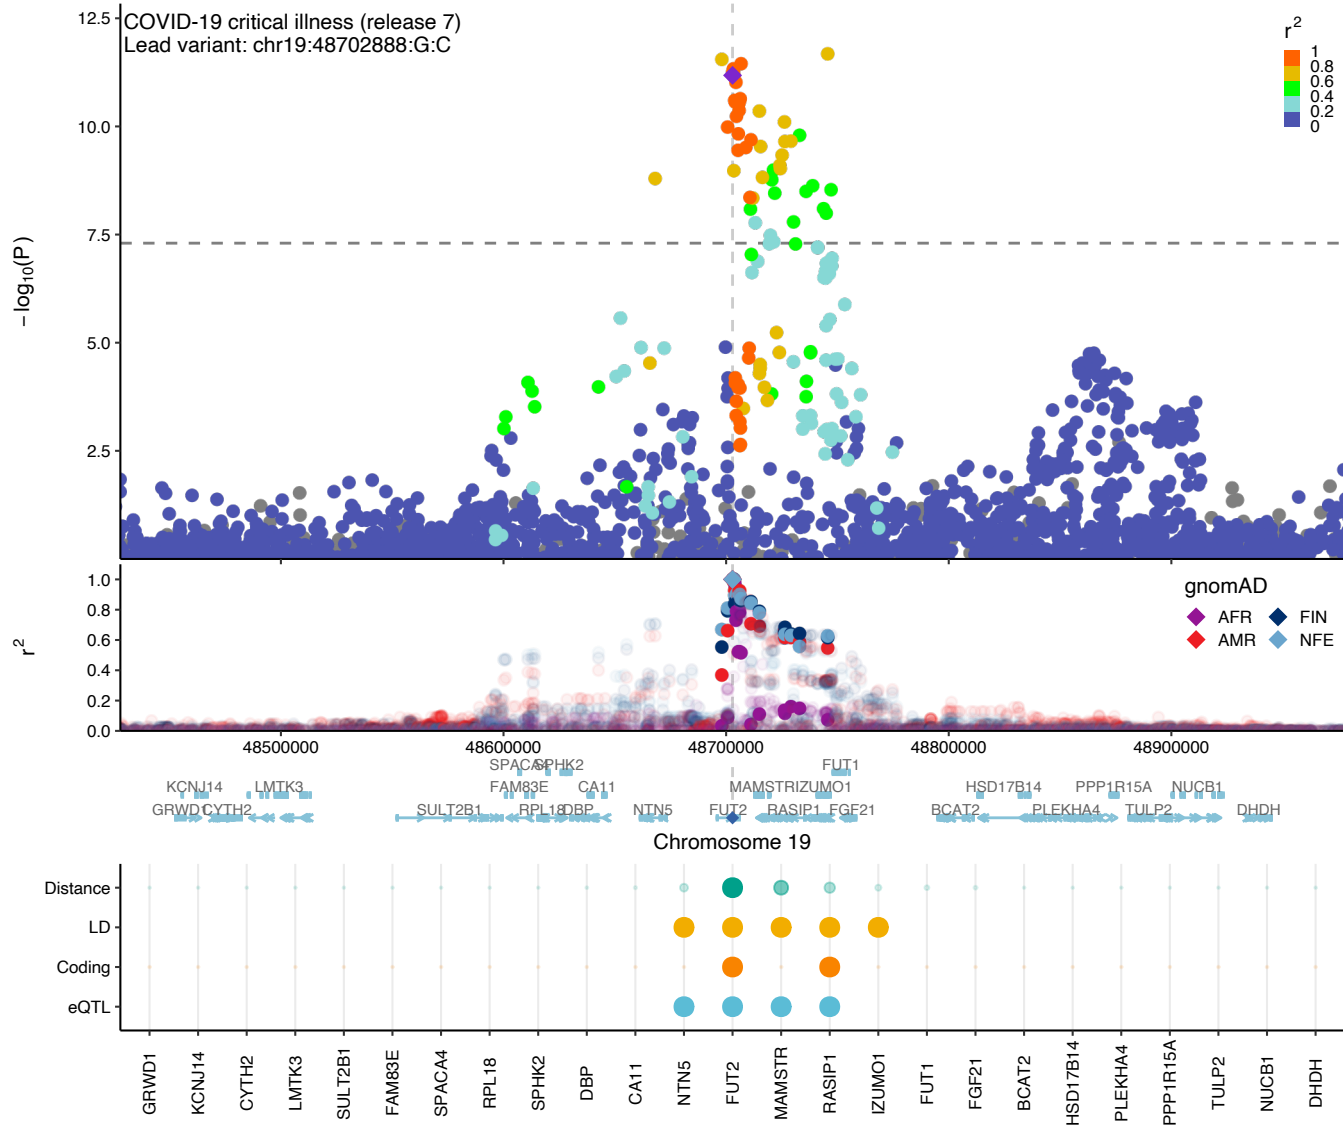

COVID-19 critical illness (release 7)  
Lead variant: chr19:50379362:T:C

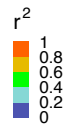

$-\log_{10}(P)$

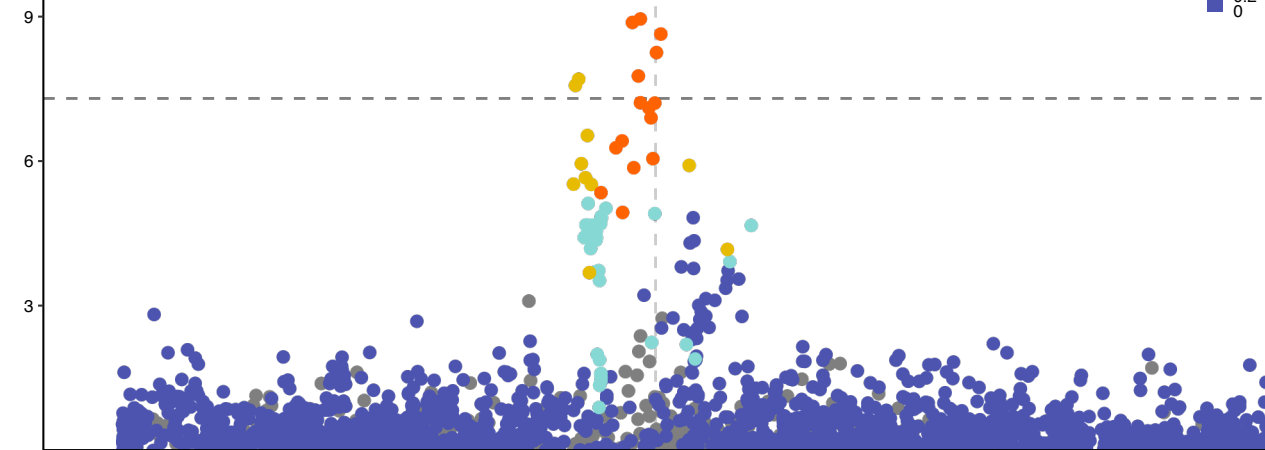

$r^2$

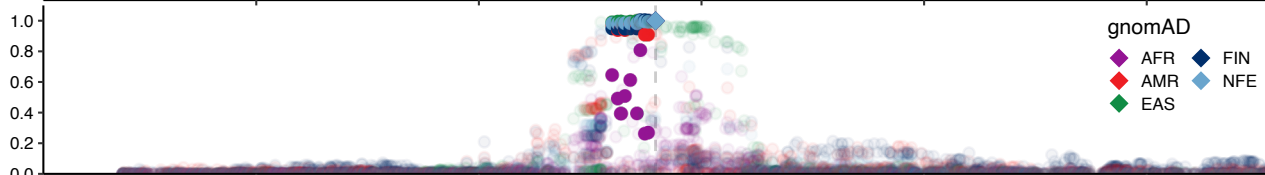

gnomAD

- AFR (purple diamond)
- AMR (red diamond)
- EAS (green diamond)
- FIN (dark blue diamond)
- NFE (light blue diamond)

50200000 50300000 50400000 50500000 50600000

IZUMO2

MYH14

KCNC3

NAPSWB1H2

POLD1

SPIB

MYBPC2

FAM71E1

EMC10

ASPDH

LRRC4B

SYT3

Chromosome 19

Distance  
LD  
Coding  
eQTL

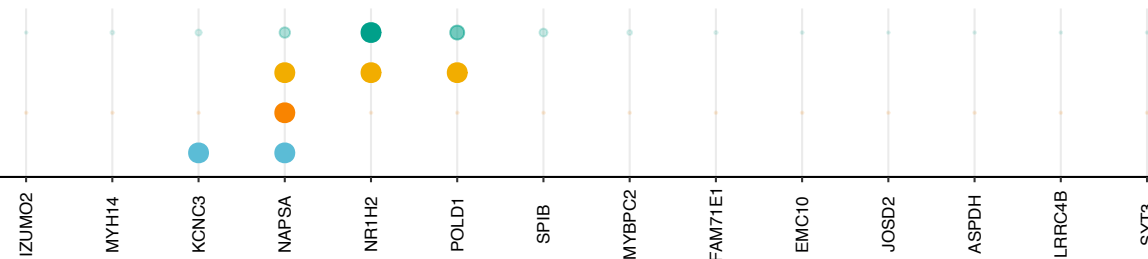

COVID-19 critical illness (release 7)  
Lead variant: chr21:41471061:G:A

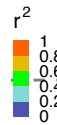

$-\log_{10}(P)$

$r^2$

gnomAD

- AFR (purple diamond)
- AMR (red diamond)
- EAS (green diamond)
- FIN (dark blue diamond)
- NFE (light blue diamond)

Chromosome 21

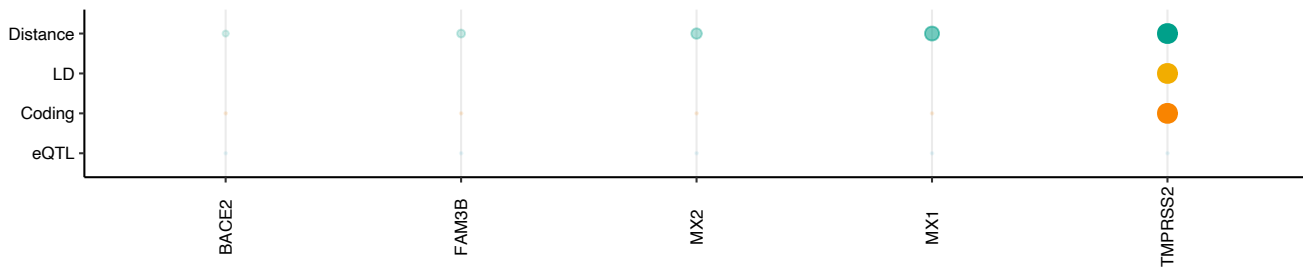

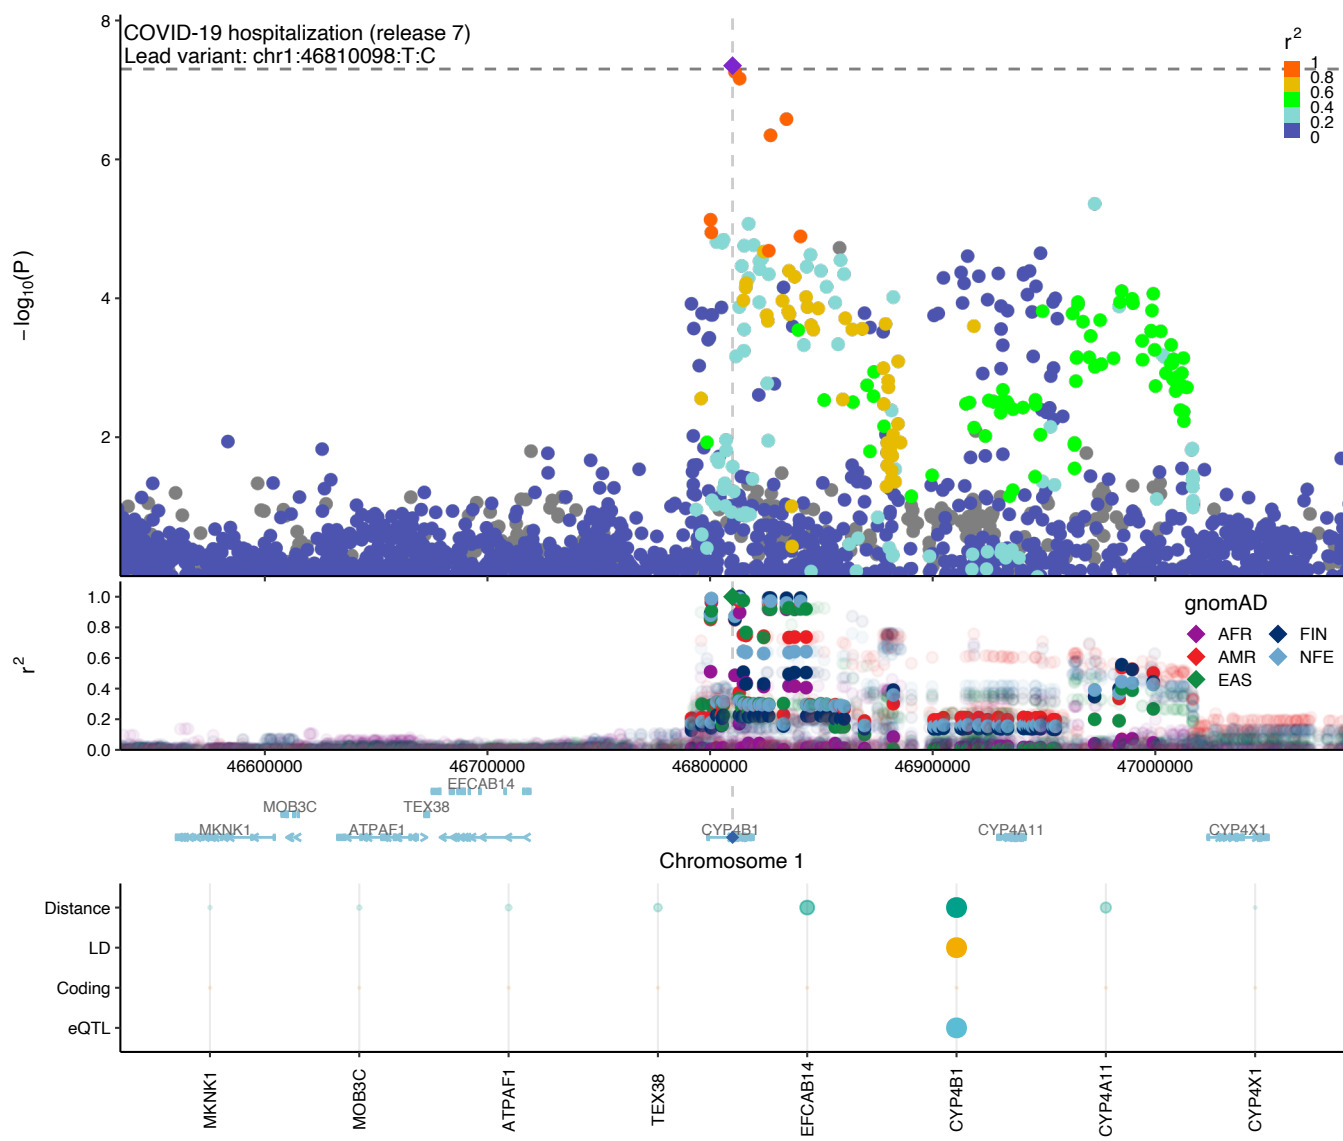



COVID-19 hospitalization (release 7)  
Lead variant: chr1:64947147:G:T



$-\log_{10}(P)$

7.5

5.0

2.5

$r^2$

1.0

0.8

0.6

0.4

0.2

0.0

gnomAD

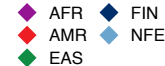

64700000 64800000 64900000 65000000 65100000 65200000

JAK1

RAVER2

AK4

Chromosome 1

Distance  
LD  
Coding  
eQTL

RAVER2

JAK1

AK4

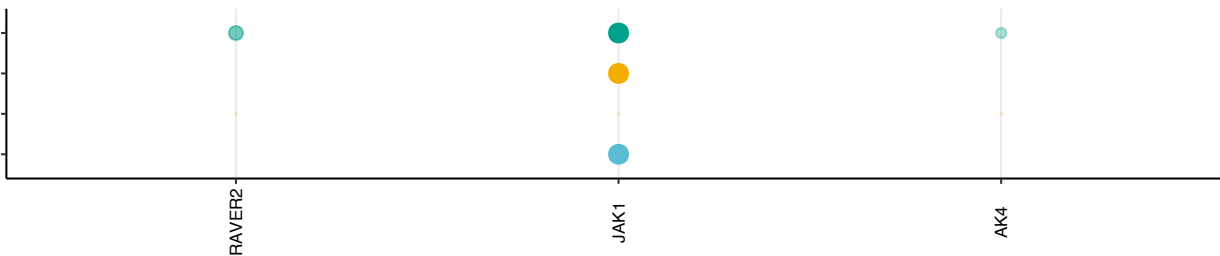

COVID-19 hospitalization (release 7)  
Lead variant: chr1:77483438:G:A

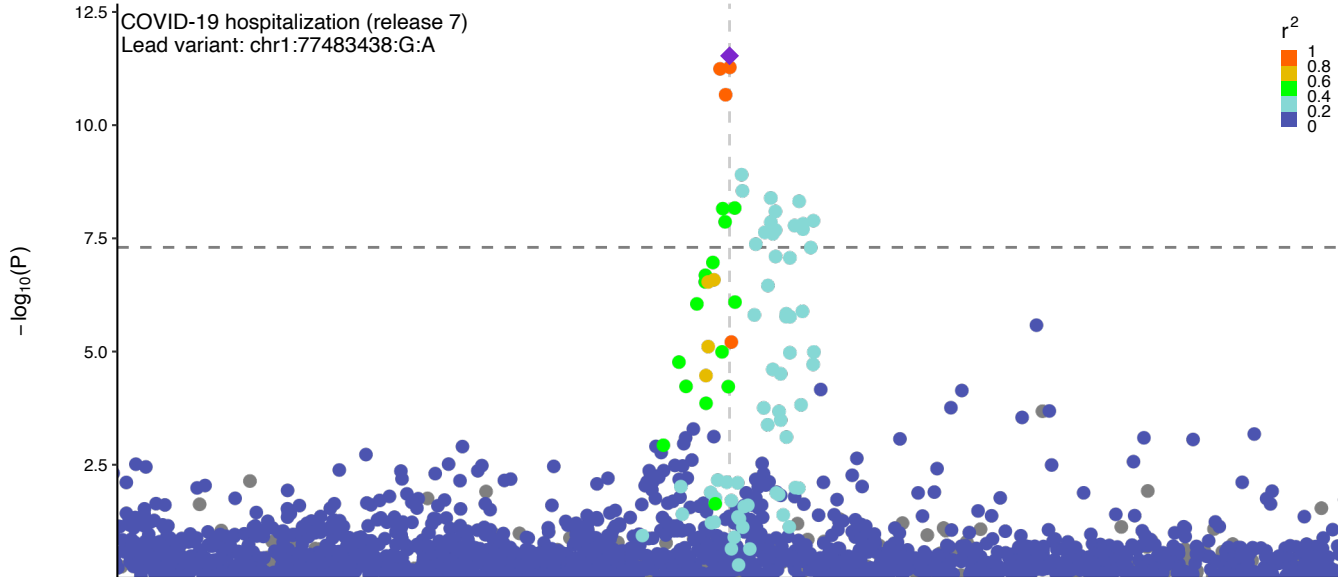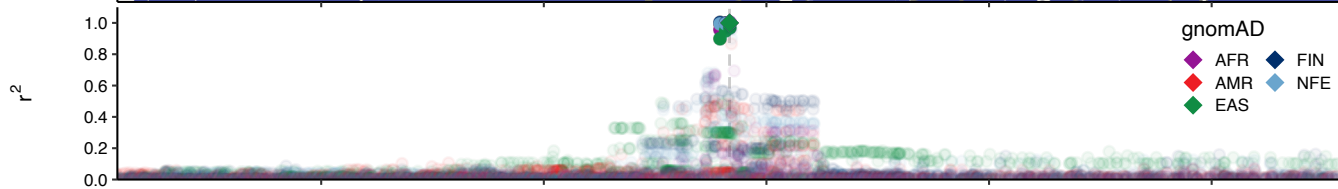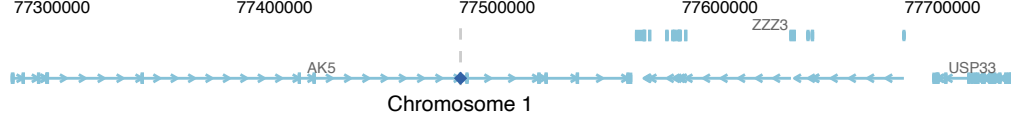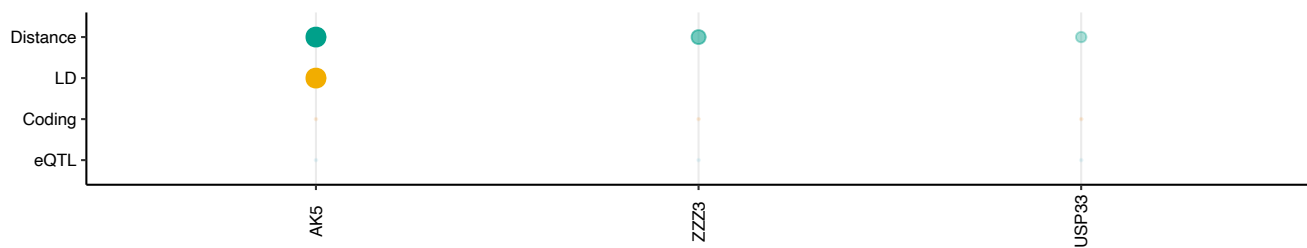

COVID-19 hospitalization (release 7)  
Lead variant: chr2:26616850:G:T

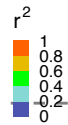

$-\log_{10}(P)$

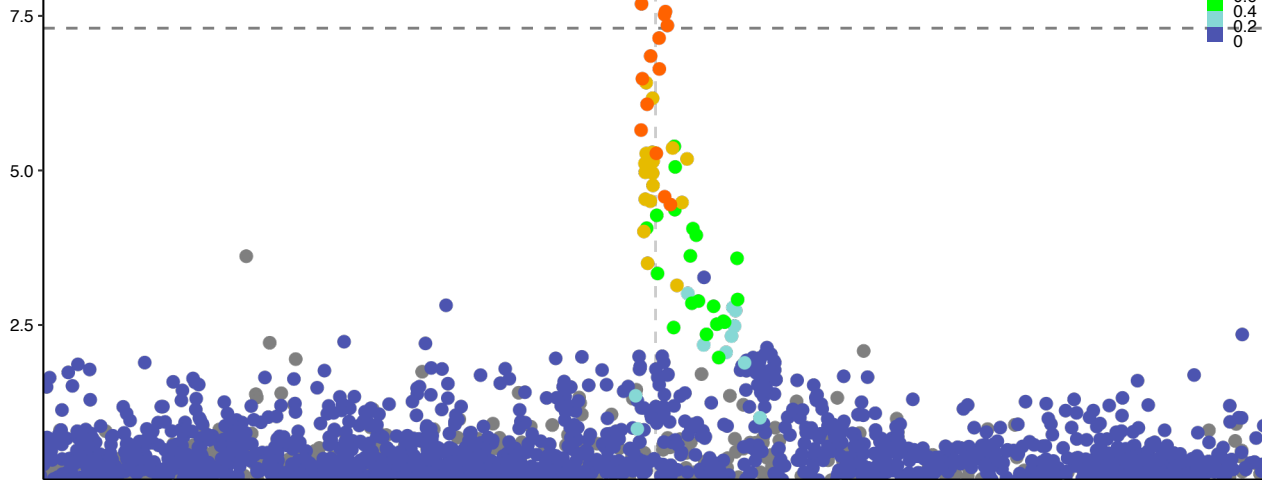

$r^2$

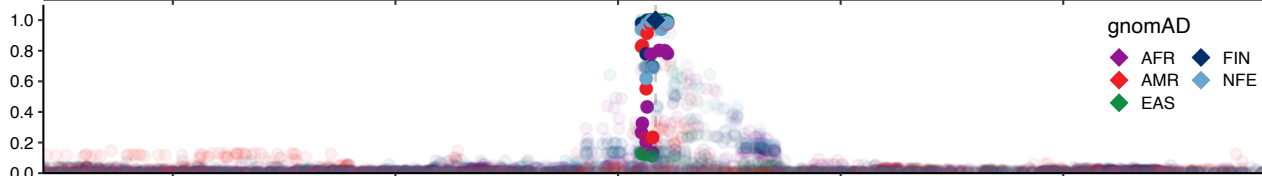

gnomAD

- AFR (Purple diamond)
- AMR (Red diamond)
- EAS (Green diamond)
- FIN (Dark blue diamond)
- NFE (Light blue diamond)

26400000 26500000 26600000 26700000 26800000

SELENOI DRC1 FAM166C CIB4 KCNK3 SLC35F6 CENPA DPYSL5

OTOF

Chromosome 2

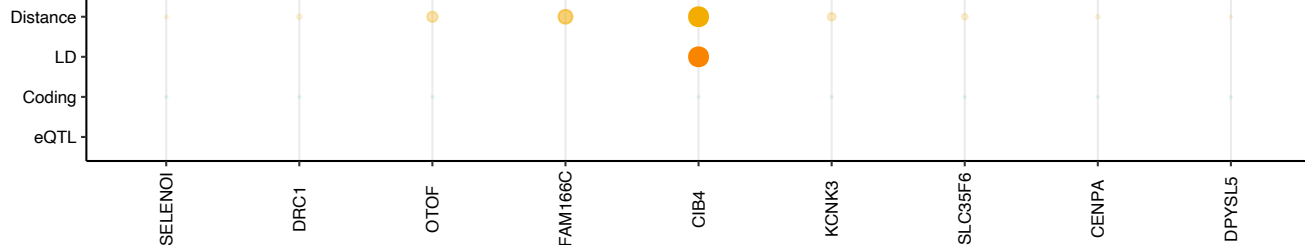

COVID-19 hospitalization (release 7)  
Lead variant: chr2:60480453:A:G

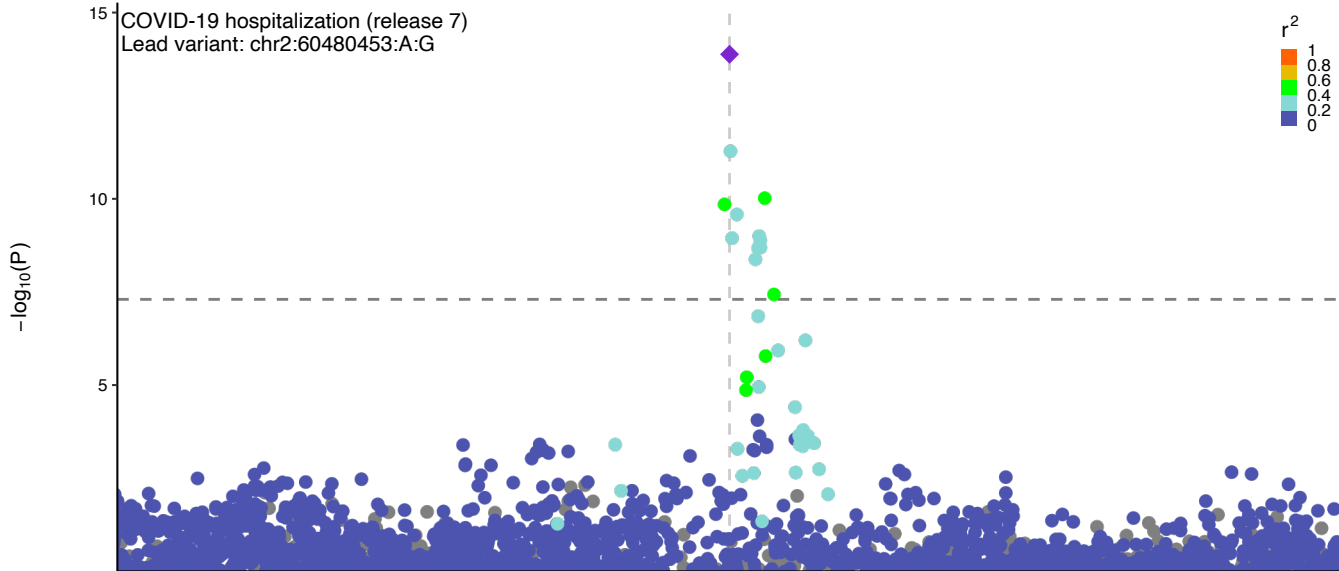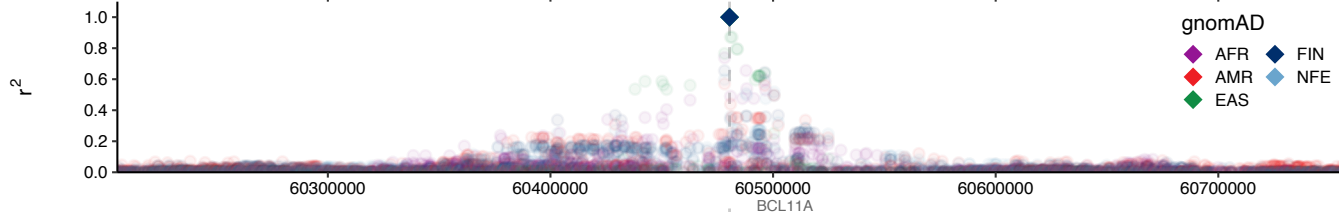

Chromosome 2

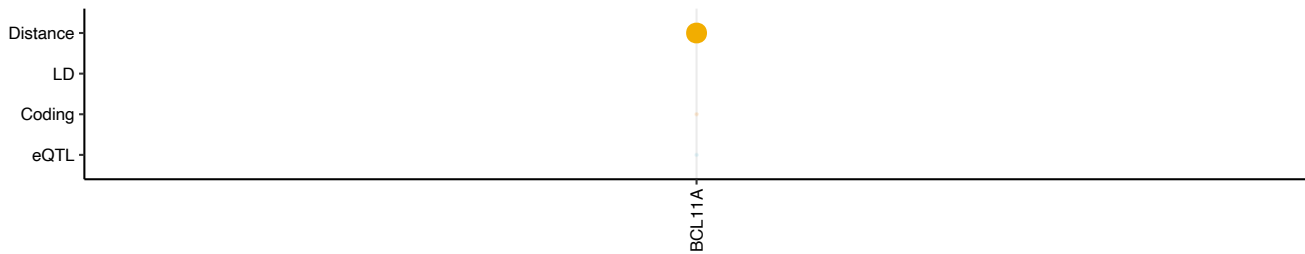

COVID-19 hospitalization (release 7)  
Lead variant: chr3:101647854:G:A



$-\log_{10}(P)$

10

5

$r^2$

1.0

0.8

0.6

0.4

0.2

0.0

gnomAD

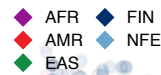

101400000

101500000

101600000

101700000

101800000

101900000

PCNP

RPL24

NXPE3

SEN7

TRMT10C

ZBTB11

CEP97

NFKB1Z

Chromosome 3

Distance

LD

Coding

eQTL

SEN7

TRMT10C

PCNP

ZBTB11

RPL24

CEP97

NXPE3

NFKB1Z

COVID-19 hospitalization (release 7)  
Lead variant: chr4:105897896:G:A

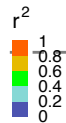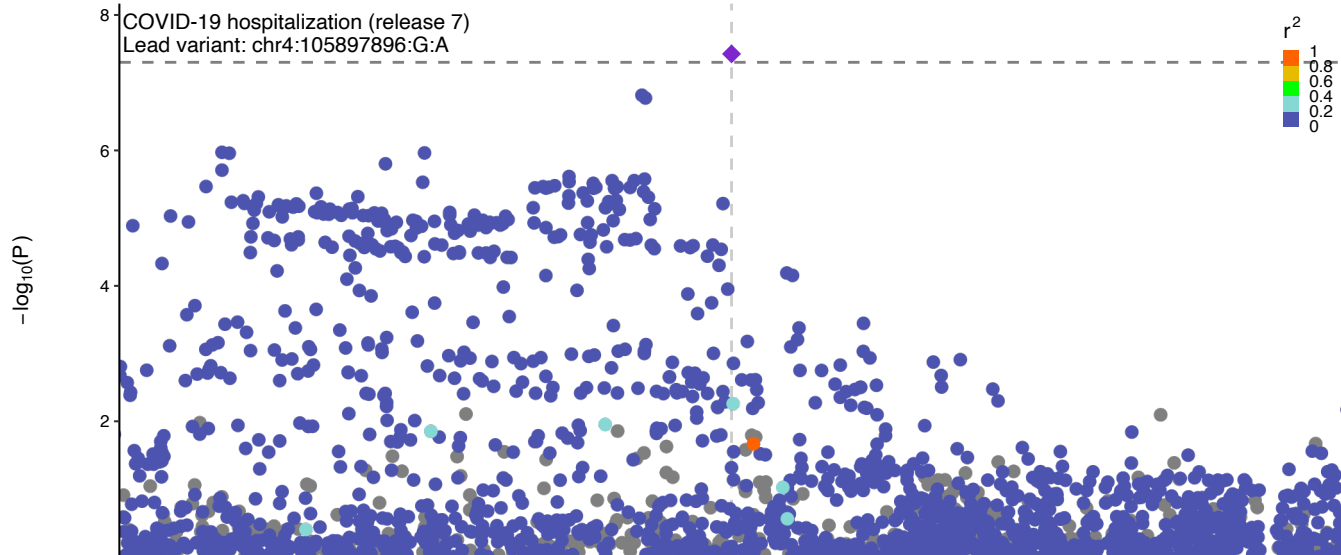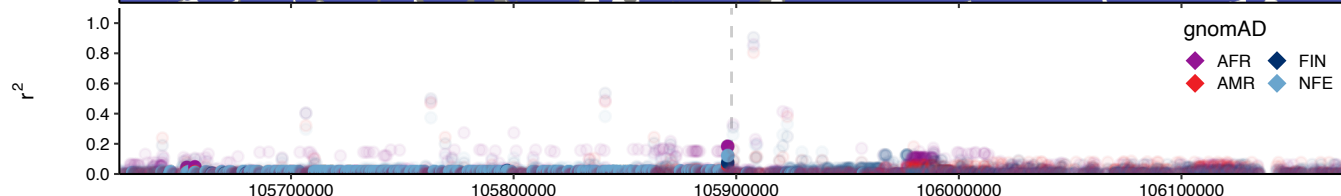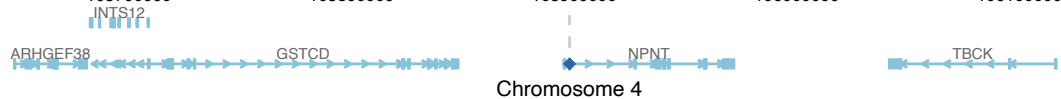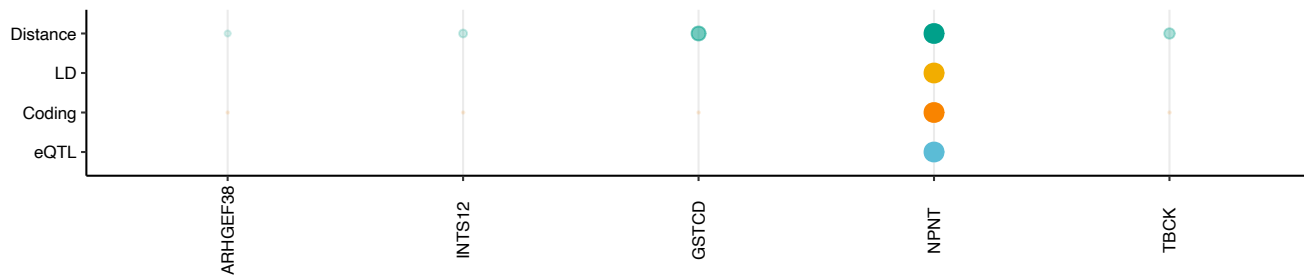

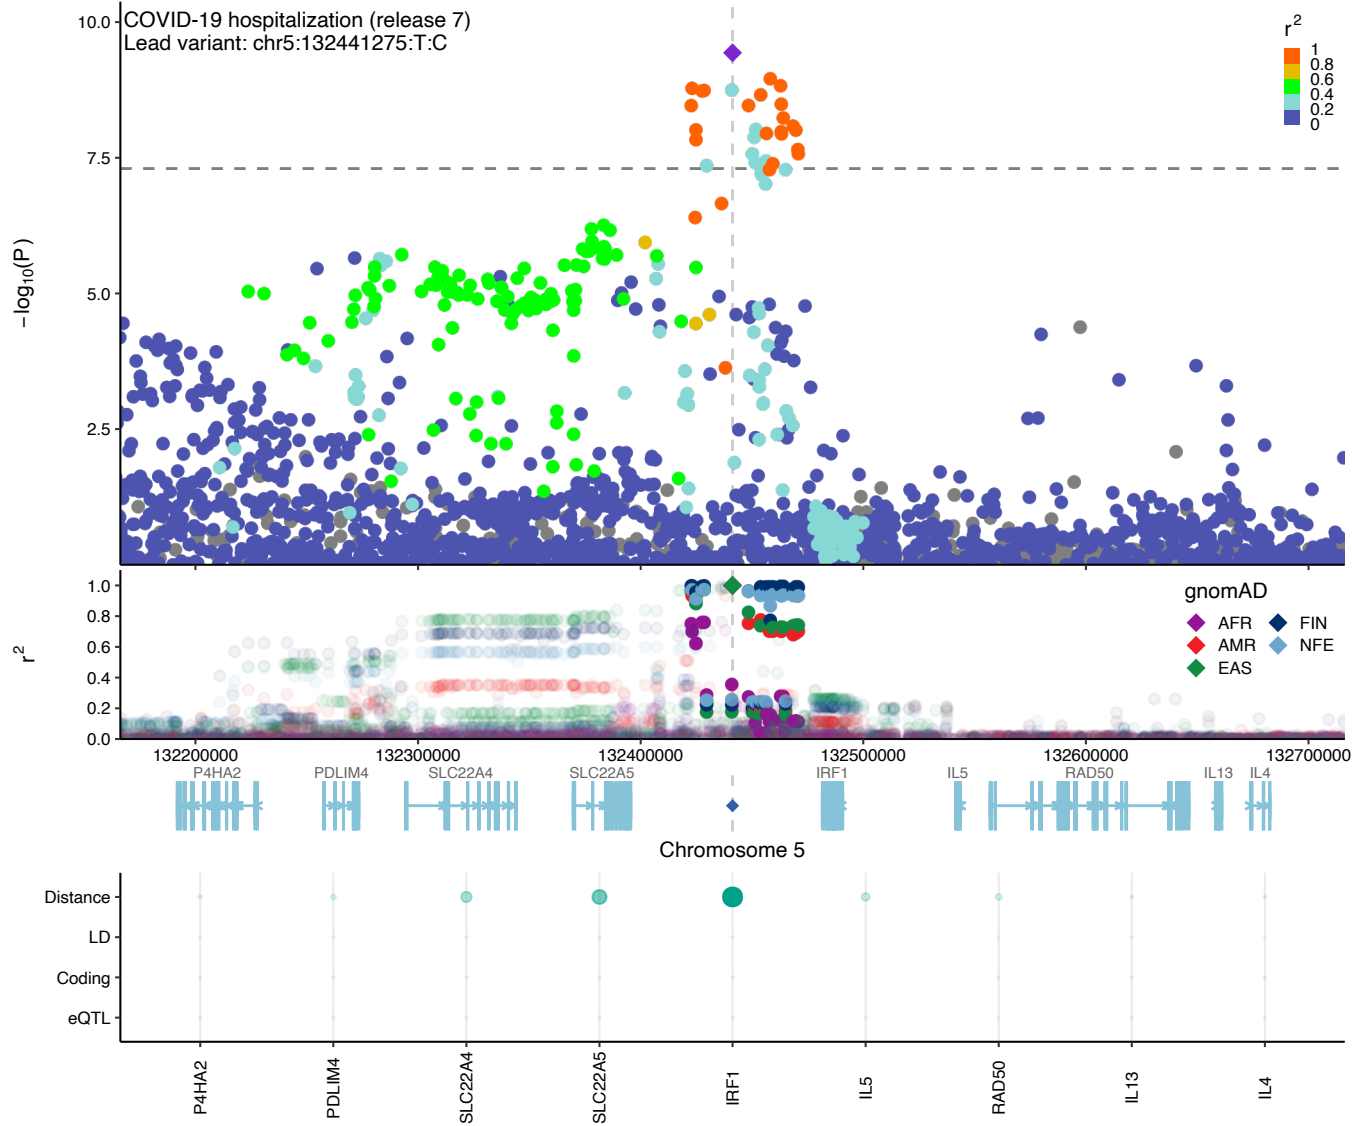

COVID-19 hospitalization (release 7)  
Lead variant: chr6:29947491:C:T

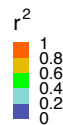

$-\log_{10}(P)$

9  
6  
3

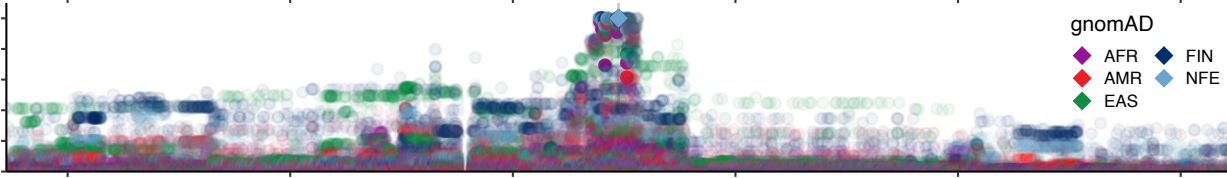

29700000 29800000 29900000 30000000 30100000 30200000

HLA-F

HLA-G

HLA-A

RNF39  
PPP1R11  
ZNRD1

TRIM31

TRIM10  
TRIM40  
TRIM15  
TRIM26

Chromosome 6

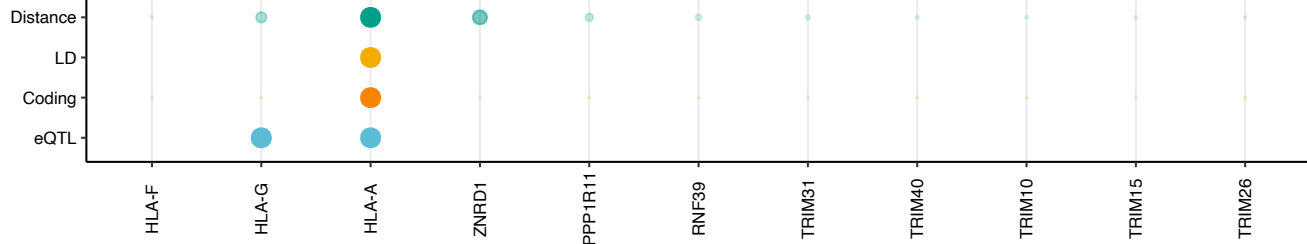



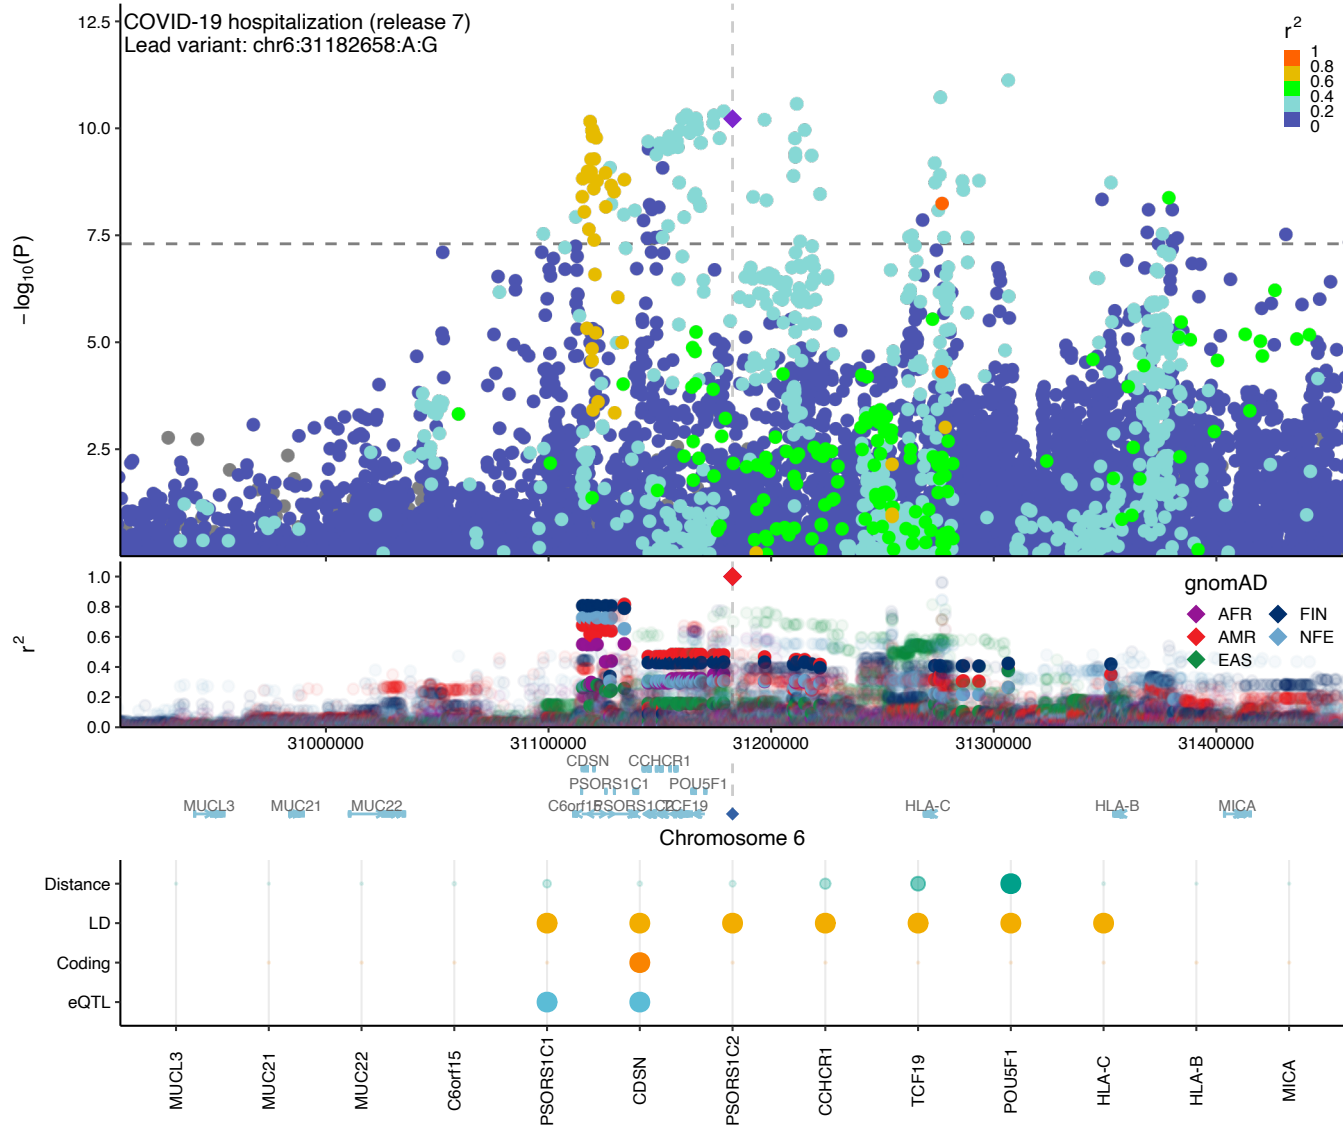

COVID-19 hospitalization (release 7)  
Lead variant: chr6:41520640:G:A

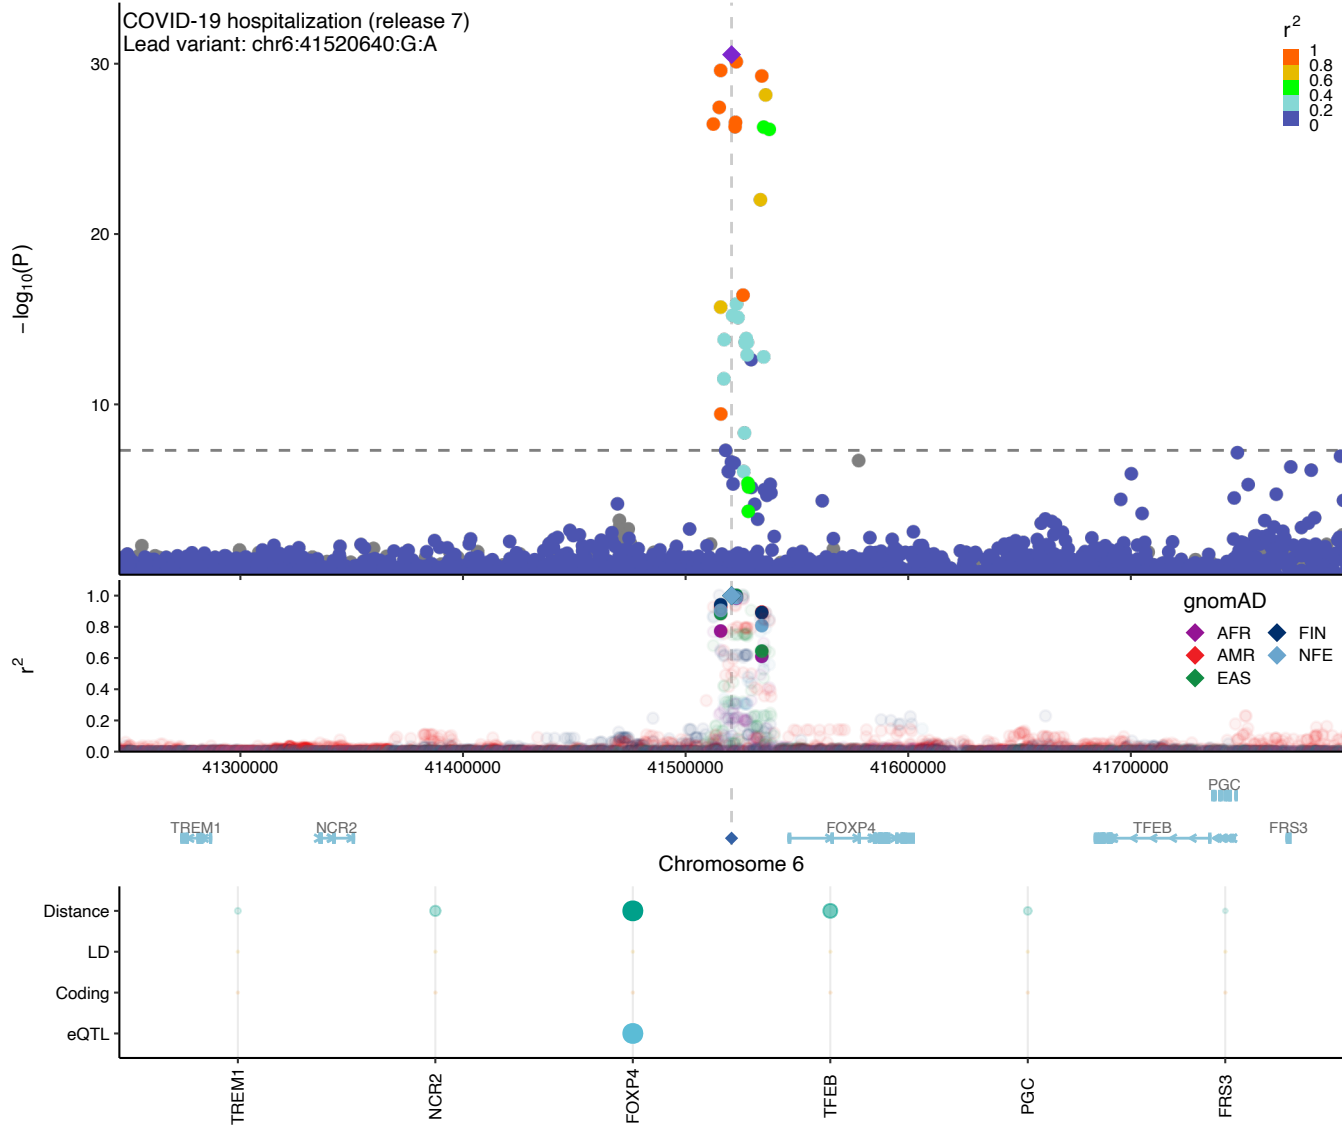

COVID-19 hospitalization (release 7)  
Lead variant: chr7:22854868:T:C

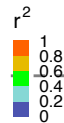

$-\log_{10}(P)$

$r^2$

gnomAD

- AFR
- AMR
- EAS
- FIN
- NFE

Distance

LD

Coding

eQTL

IL6

TOMM7

FAM126A

Chromosome 7

22600000 22700000 22800000 22900000 23000000 23100000

IL6

TOMM7

FAM126A

COVID-19 hospitalization (release 7)

Lead variant: chr7:100032719:C:T

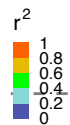

$-\log_{10}(P)$

$r^2$

gnomAD

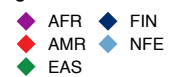

99800000 99900000 100000000 100100000 100200000 100300000

CYP3A4 CYP3A43 OR2AE1 TRIM4 GUC3 AZGP1 ZKSCAN1 ZNF3 ZNF3 MCM7 CNPY4 MBLAC1 MAP11 GAL3ST4 STAG3 PVRIG

Chromosome 7

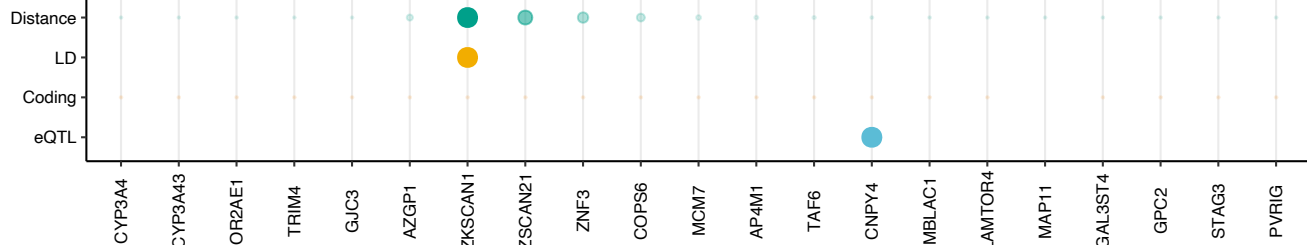

COVID-19 hospitalization (release 7)  
Lead variant: chr8:60513412:G:A

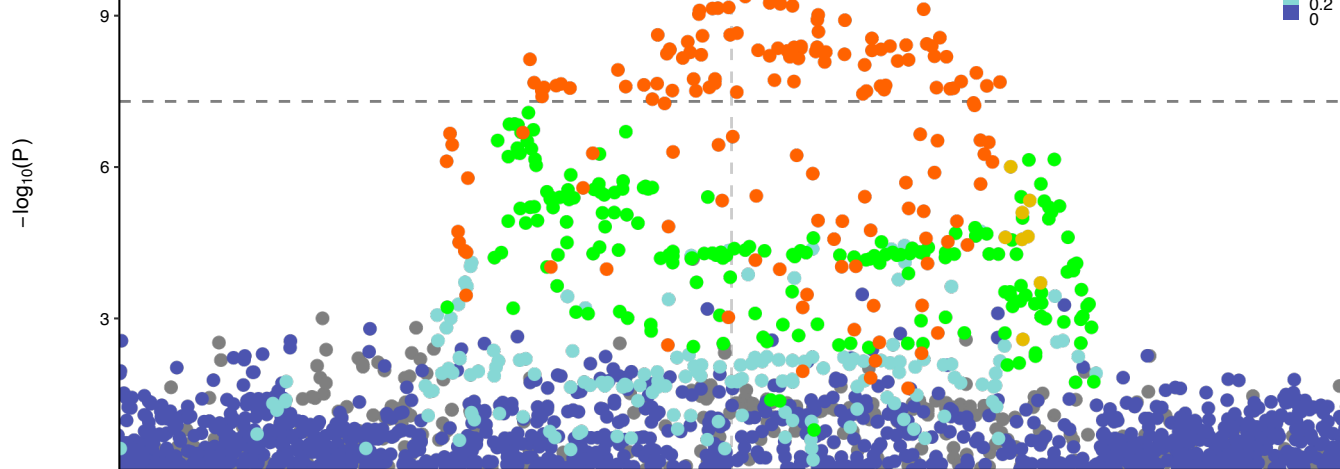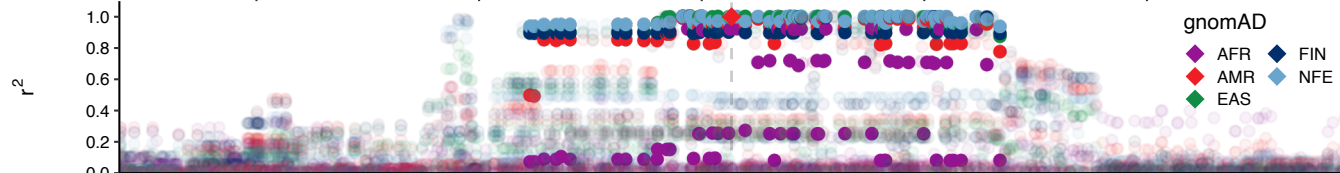

gnomAD

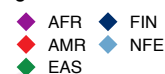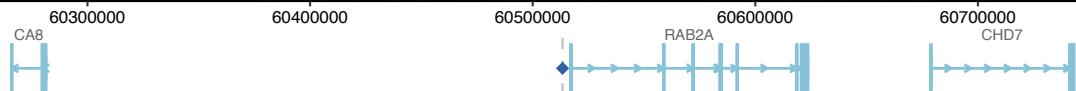

Chromosome 8

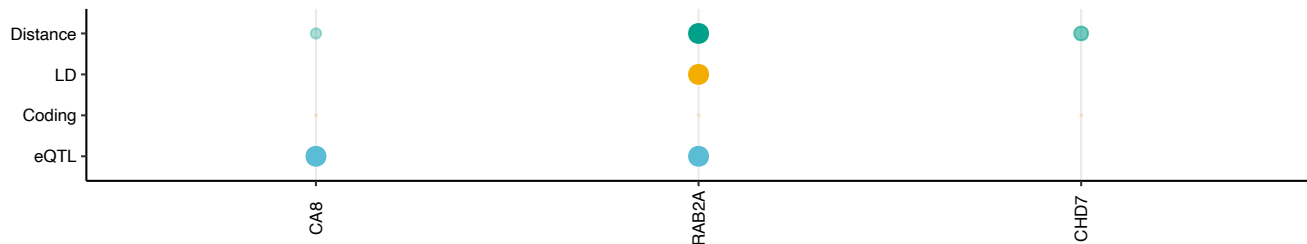

COVID-19 hospitalization (release 7)  
Lead variant: chr9:15795835:G:T

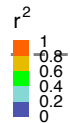

$-\log_{10}(P)$

$r^2$

gnomAD

- AFR
- AMR
- FIN
- NFE

15400000 15600000 15800000 16000000

SNAPC3

PSIP1

CCDC171

Chromosome 9

Distance

LD

Coding

eQTL

SNAPC3

PSIP1

CCDC171

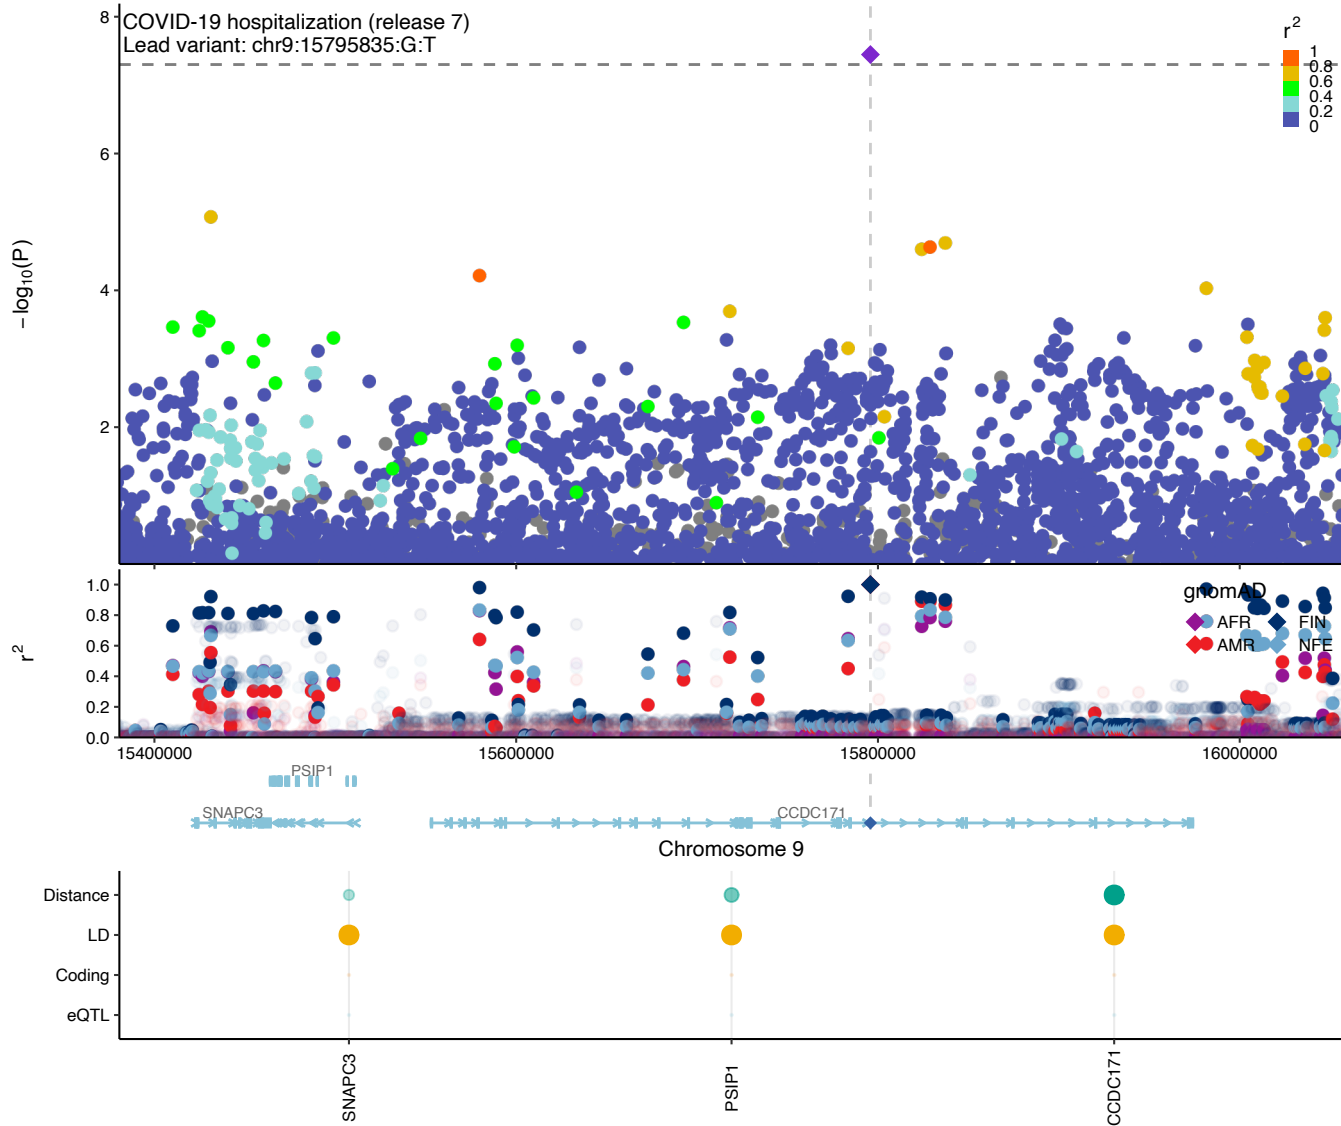

COVID-19 hospitalization (release 7)  
Lead variant: chr9:33425186:GTAAC:G

$r^2$   
1  
0.8  
0.6  
0.4  
0.2  
0

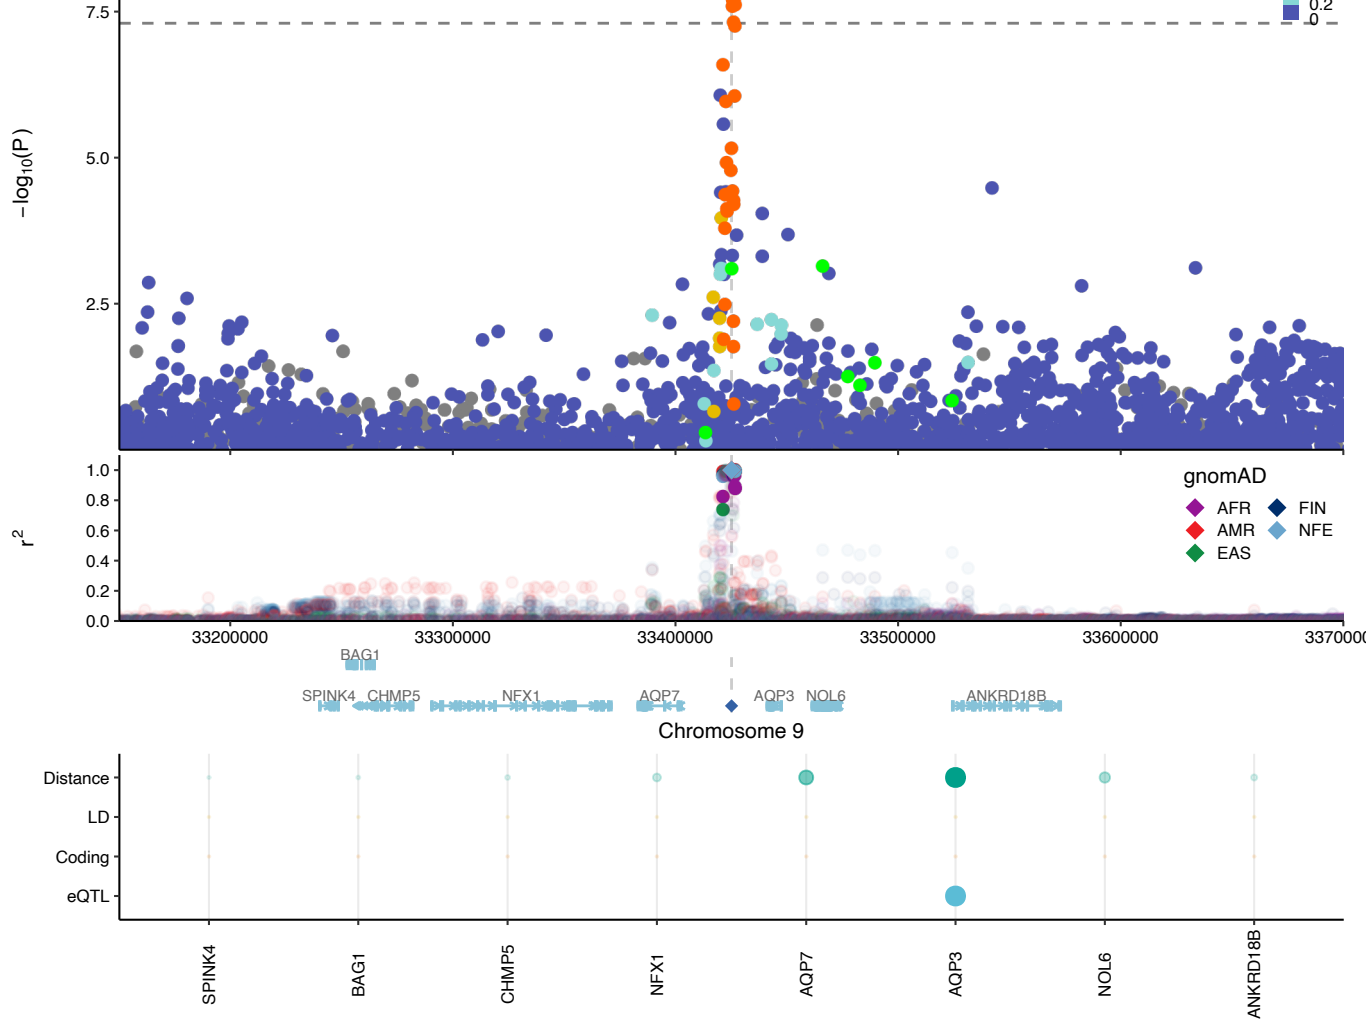

COVID-19 hospitalization (release 7)  
Lead variant: chr9:133273813:C:T



$-\log_{10}(P)$

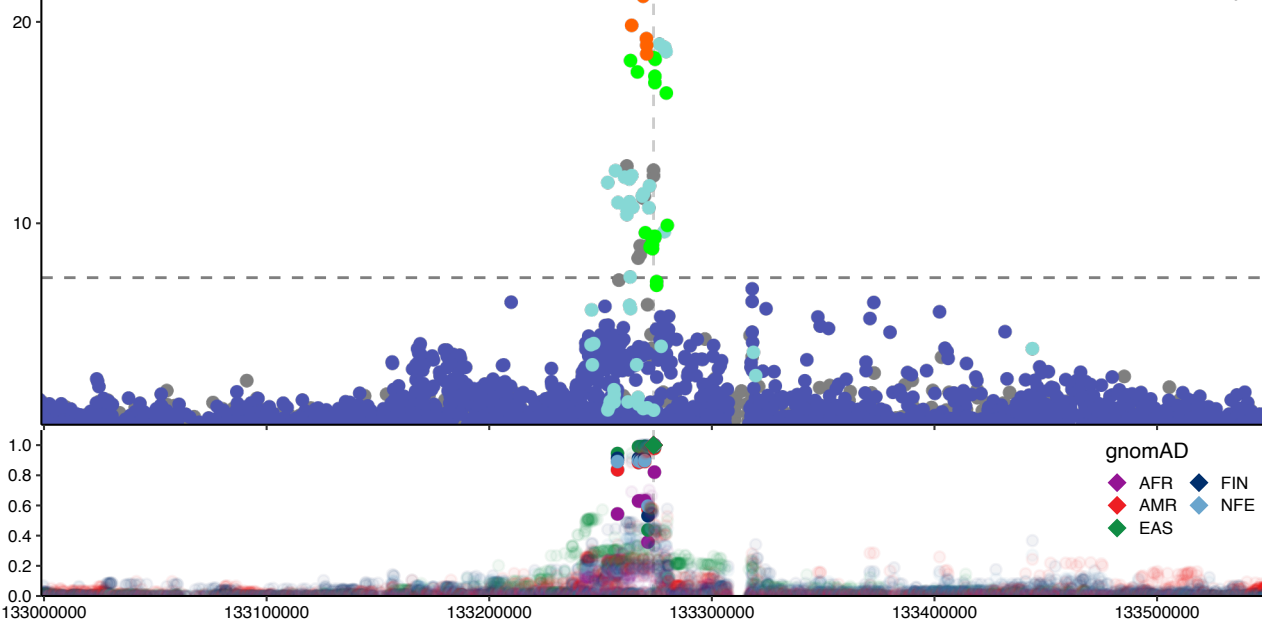

gnomAD

- AFR (purple diamond)
- AMR (red diamond)
- EAS (green diamond)
- FIN (dark blue diamond)
- NFE (light blue diamond)

$r^2$

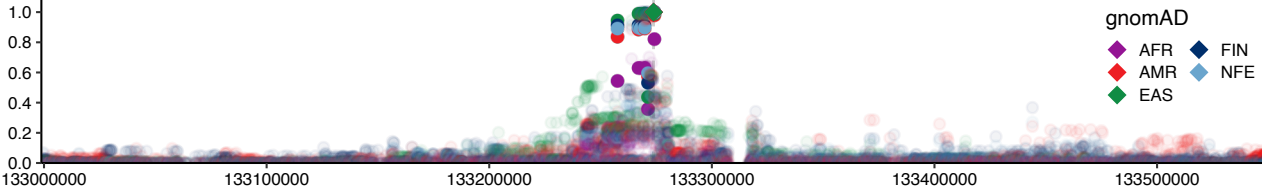

Chromosome 9

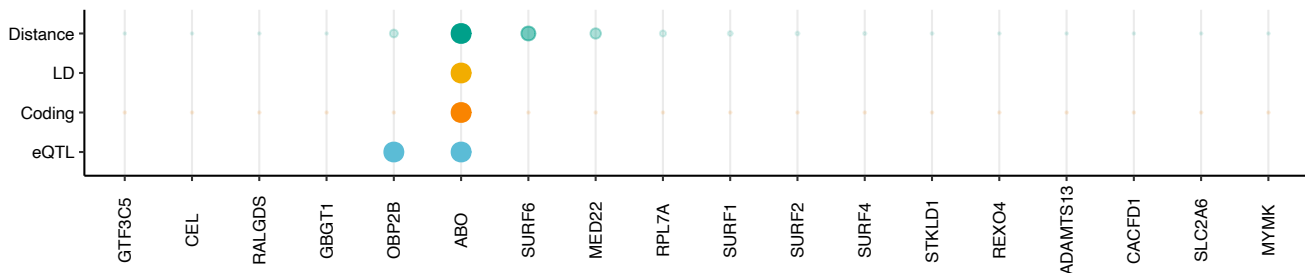



COVID-19 hospitalization (release 7)  
Lead variant: chr10:79977061:G:A

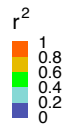

$-\log_{10}(P)$

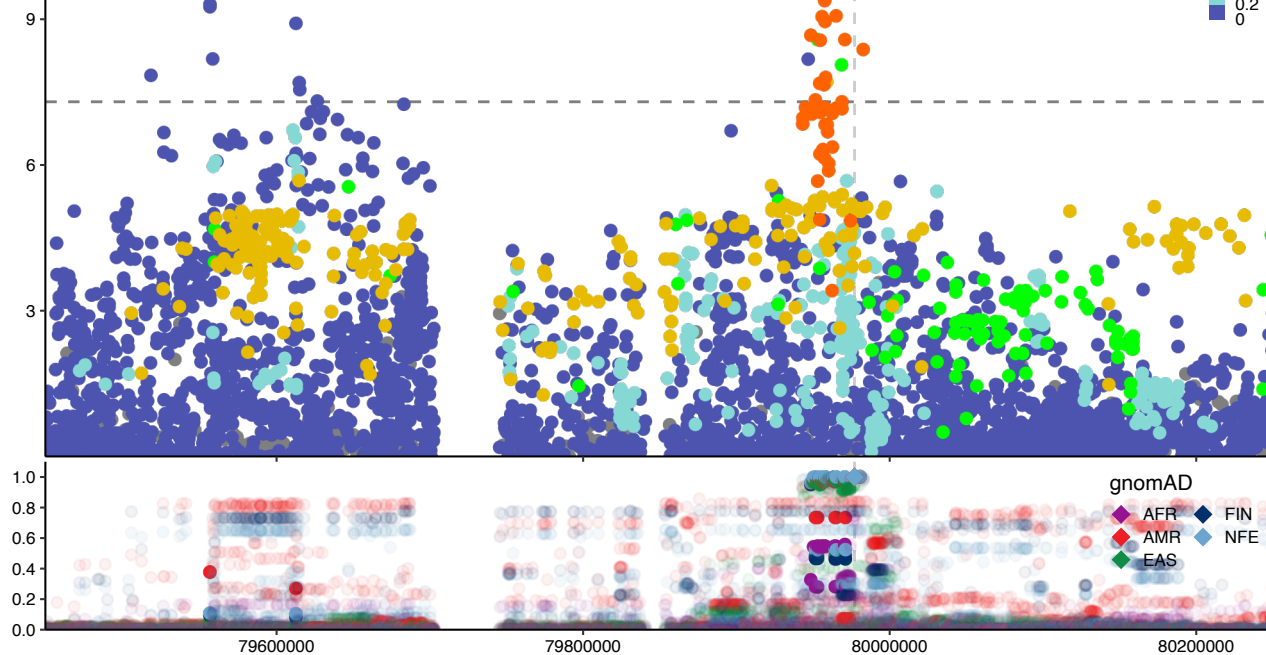

EIF5AL1 SFTPA2 SFTPA1 NUTM2B NUTM2E SFTPD TMEM254 PLAC9 ANXA11

Chromosome 10

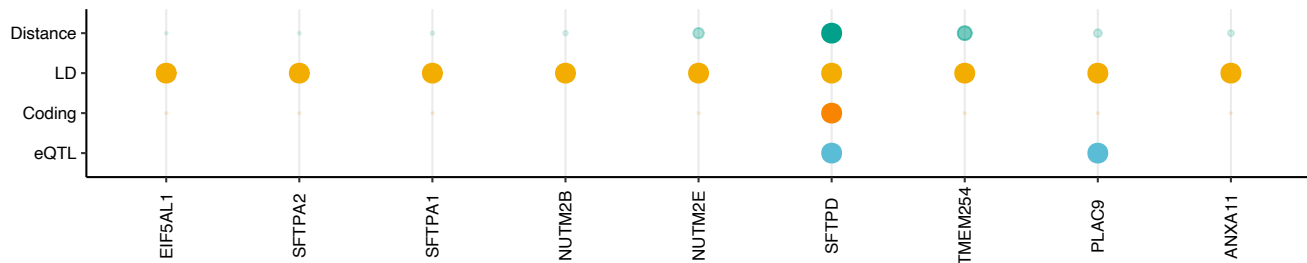

# COVID-19 hospitalization (release 7)

Lead variant: chr10:112972548:C:A

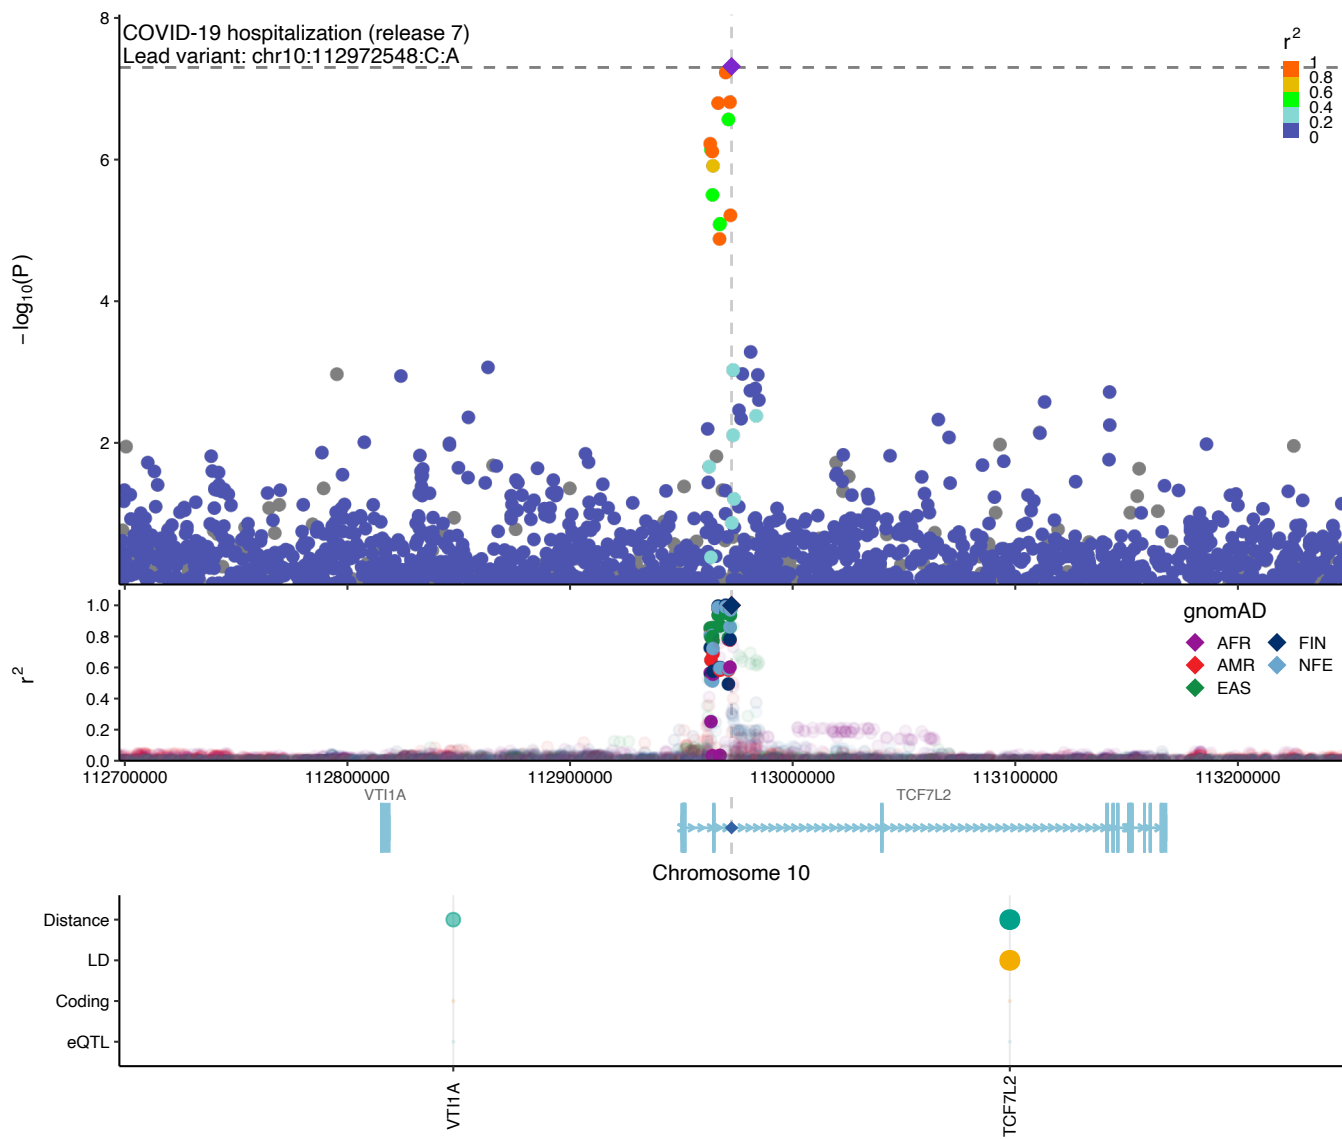

COVID-19 hospitalization (release 7)  
Lead variant: chr11:1219991:G:T



$-\log_{10}(P)$

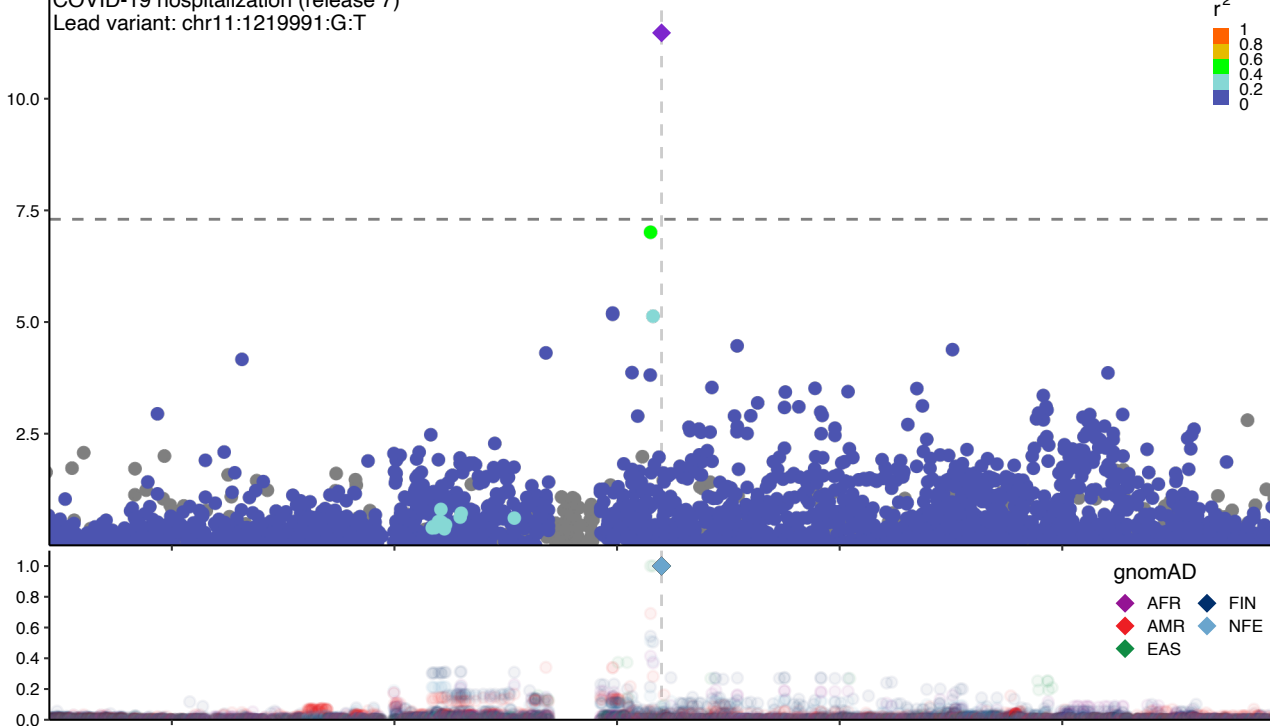

gnomAD

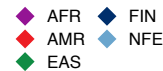

$r^2$

1000000 1100000 1200000 1300000 1400000

MUC6

AP2A2

MUC2

MUC5AC

MUC5B

TOLLIP

BRSK2

MOB2

Chromosome 11

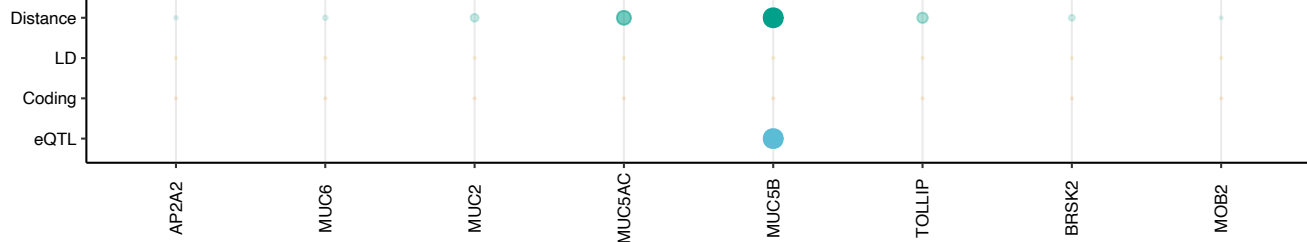

COVID-19 hospitalization (release 7)  
Lead variant: chr11:34480495:C:T

$r^2$   
1  
0.8  
0.6  
0.4  
0.2  
0

$-\log_{10}(P)$

$r^2$

gnomAD

AFR  
AMR  
EAS  
FIN  
NFE

ABTB2

CAT

ELF5

EHF

Chromosome 11

Distance  
LD  
Coding  
eQTL

ABTB2

CAT

ELF5

EHF

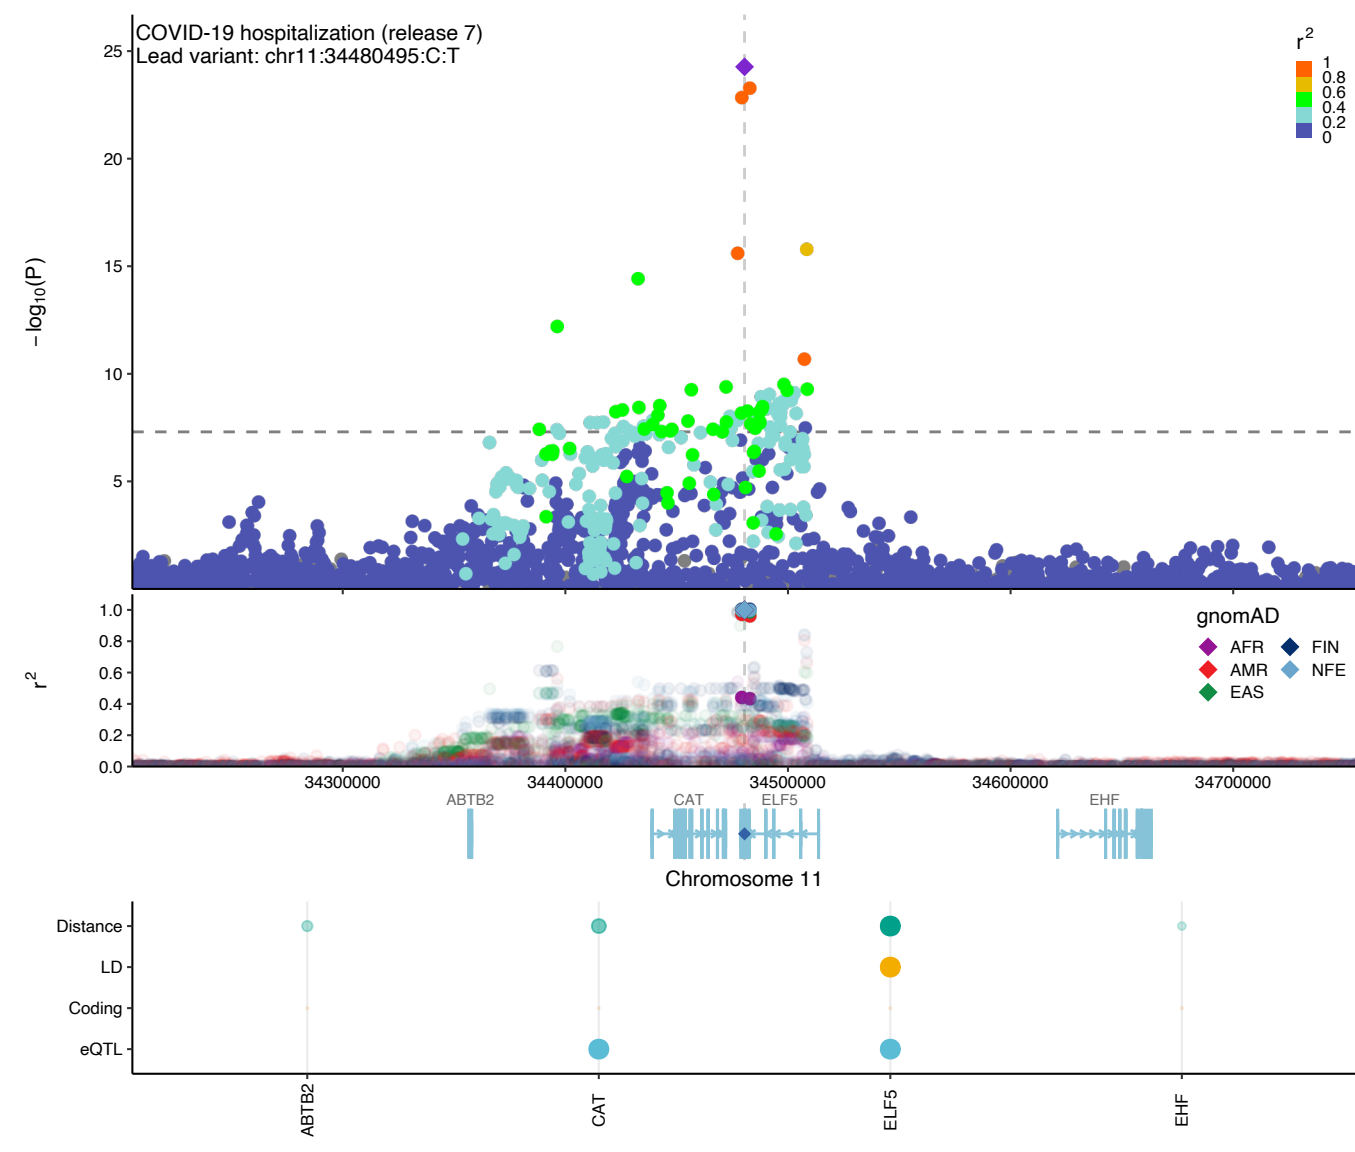

COVID-19 hospitalization (release 7)  
Lead variant: chr12:112922758:T:C

$r^2$

1  
0.8  
0.6  
0.4  
0.2  
0

$-\log_{10}(P)$

$r^2$

gnomAD

AFR ◆ FIN  
AMR ◆ NFE  
EAS ◆

112700000

112800000

112900000

113000000

113100000

BASAL1

DDX54

RPH3A

OAS1

OAS3

DTX1

CFAP73

Chromosome 12

Distance

LD

Coding

eQTL

RPH3A

OAS1

OAS3

OAS2

DTX1

RASAL1

CFAP73

DDX54

COVID-19 hospitalization (release 7)  
Lead variant: chr12:132565387:T:C

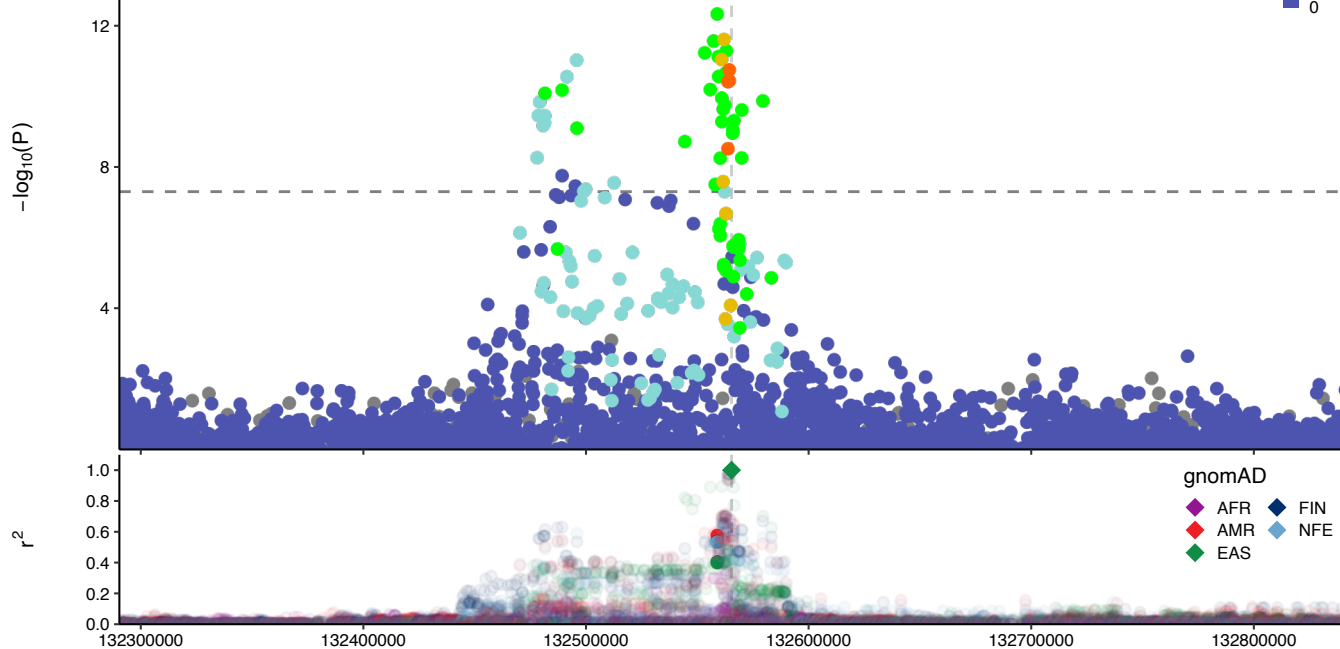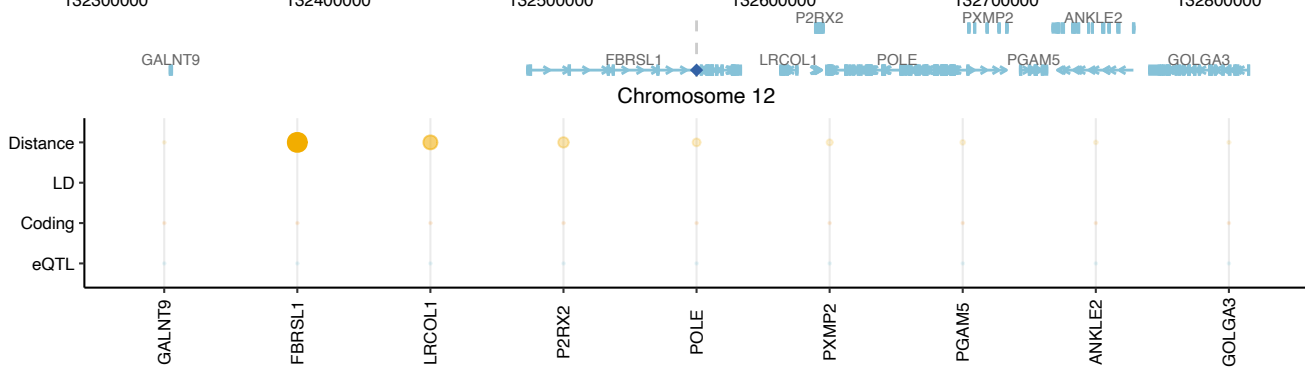

COVID-19 hospitalization (release 7)  
Lead variant: chr13:112881427:C:T

$r^2$

1  
0.8  
0.6  
0.4  
0.2  
0

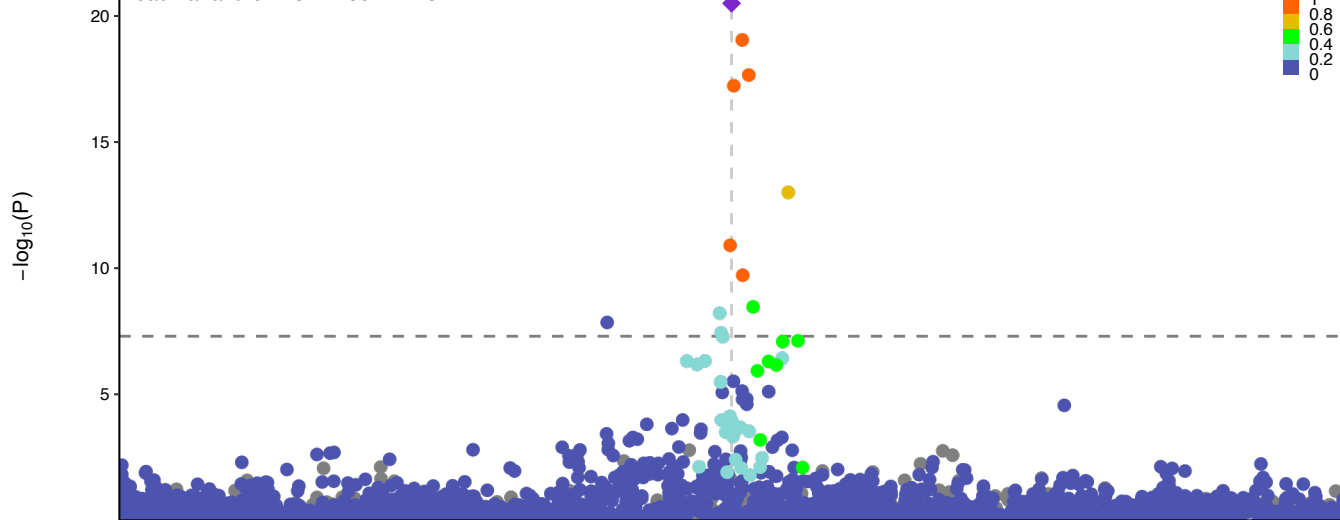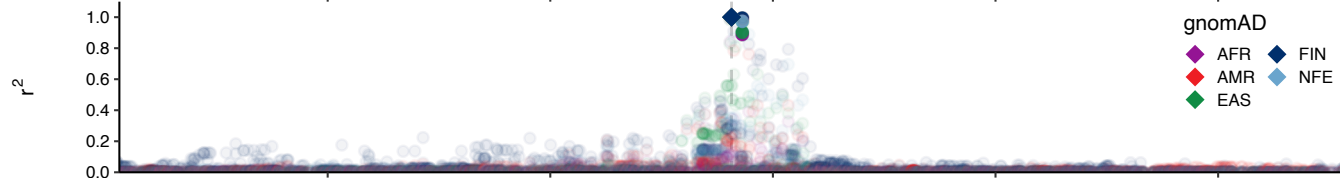

gnomAD

AFR FIN  
AMR NFE  
EAS

112700000 112800000 112900000 113000000 113100000

ATP11A

MCF2L

F7

F10

Chromosome 13

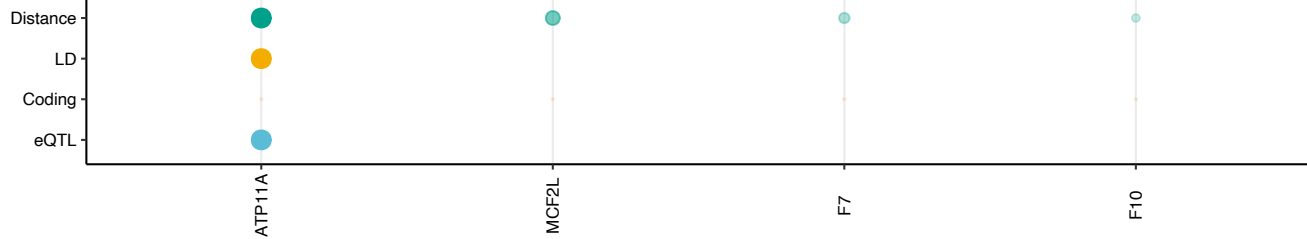

COVID-19 hospitalization (release 7)  
Lead variant: chr16:89196249:G:A

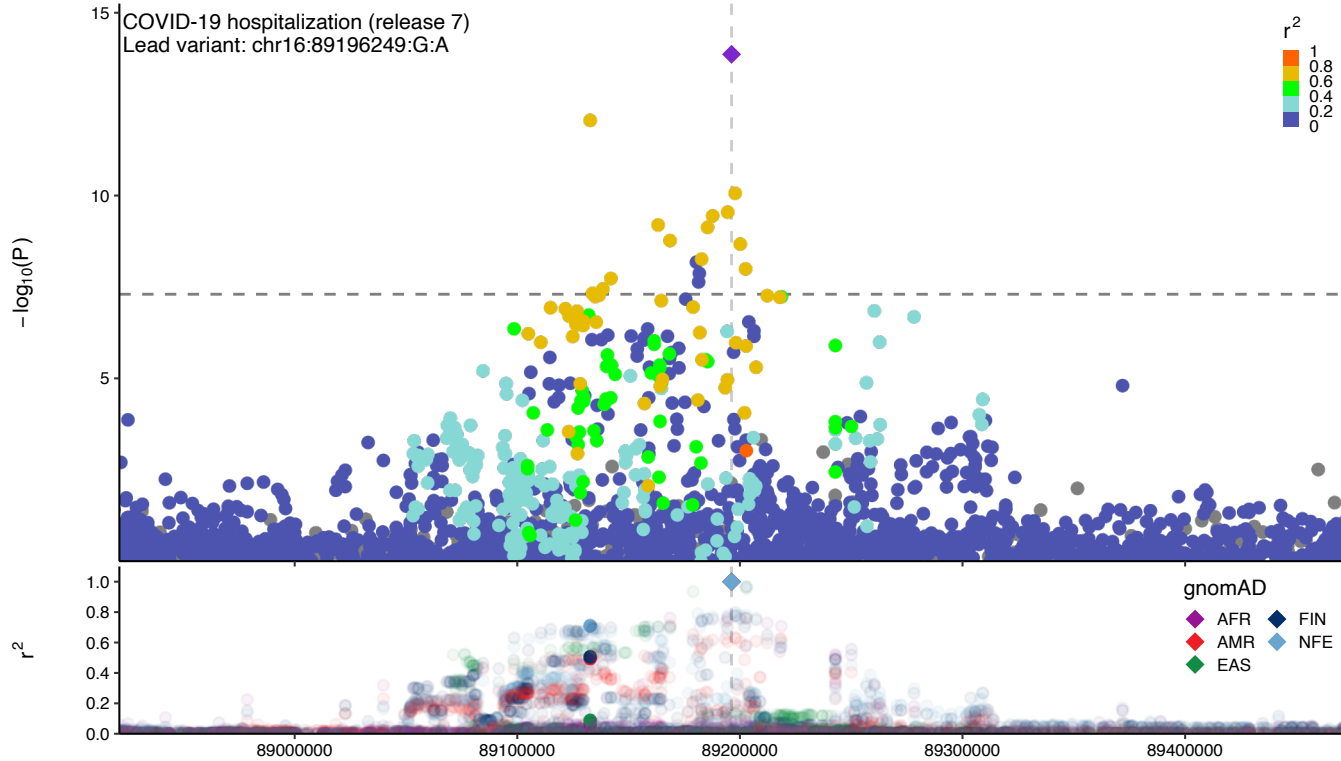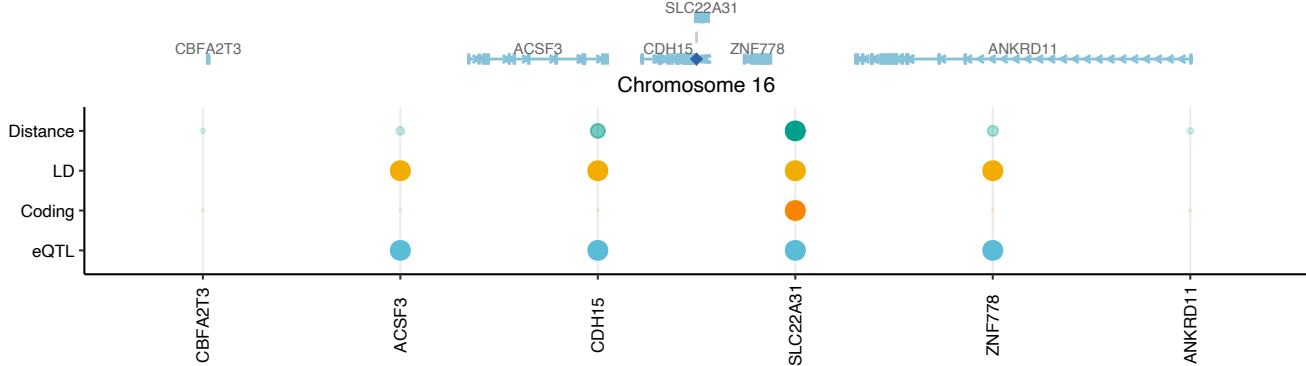



COVID-19 hospitalization (release 7)

Lead variant: chr17:45635098:G:A



$-\log_{10}(P)$

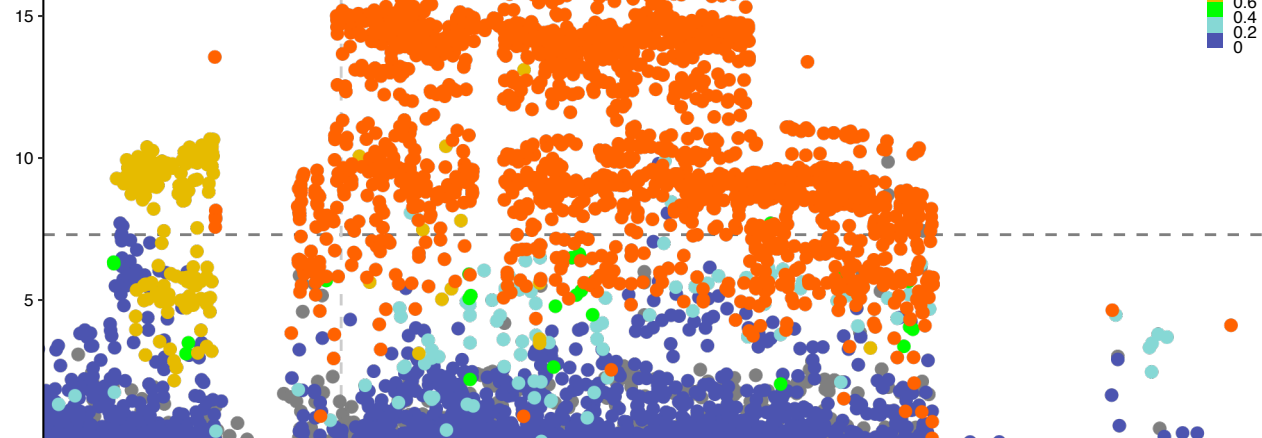

$r^2$

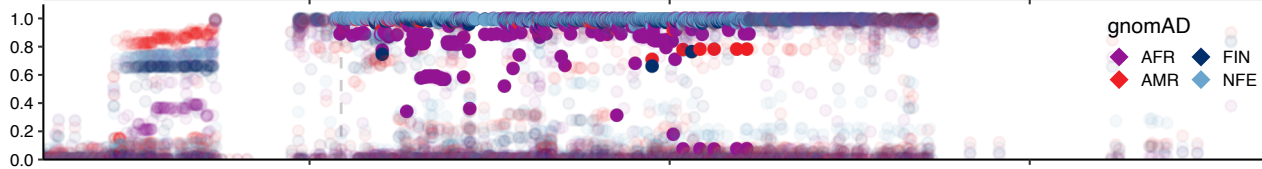

gnomAD

AFR  
AMR  
FIN  
NFE

45600000

46000000

46400000

PLEKHM1  
ARHGAP27

SPPL2C  
CRHR1  
LINC02210-CRHR1

STH  
MAPT  
KANSL1

ARL17B  
LRRC37A

ARL17A  
LRRC37A2NSF

Chromosome 17

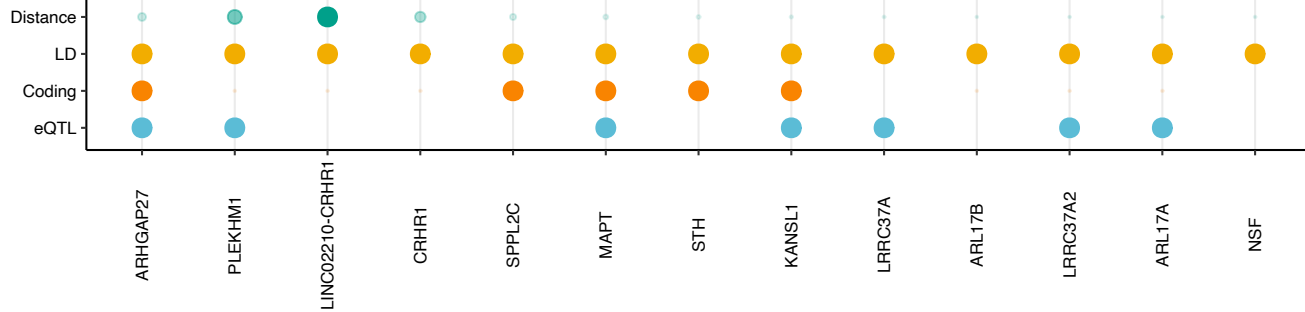

COVID-19 hospitalization (release 7)  
Lead variant: chr17:49863260:C:A



$-\log_{10}(P)$

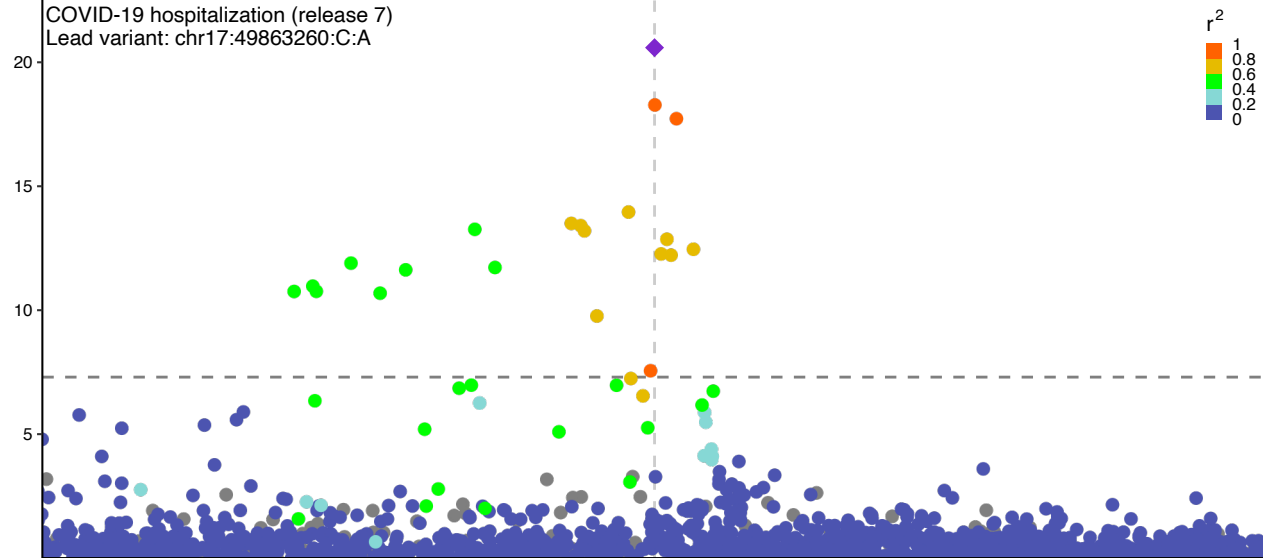

$r^2$

gnomAD

AFR FIN  
AMR NFE  
EAS

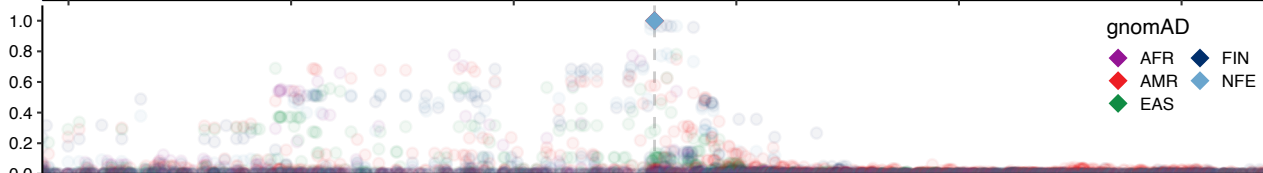

SPOP SLC35B1 FAM117A KAT7 TAC4 DLX4 DLX3 ITGA3 PDK2 SAMD14

Chromosome 17

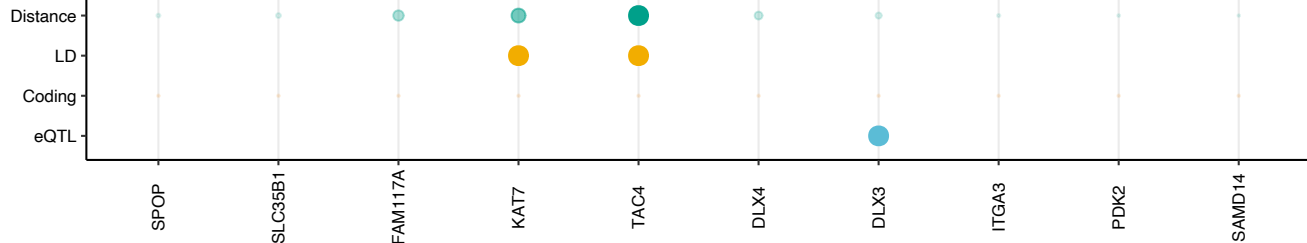

COVID-19 hospitalization (release 7)  
Lead variant: chr19:4717660:A:G



$-\log_{10}(P)$

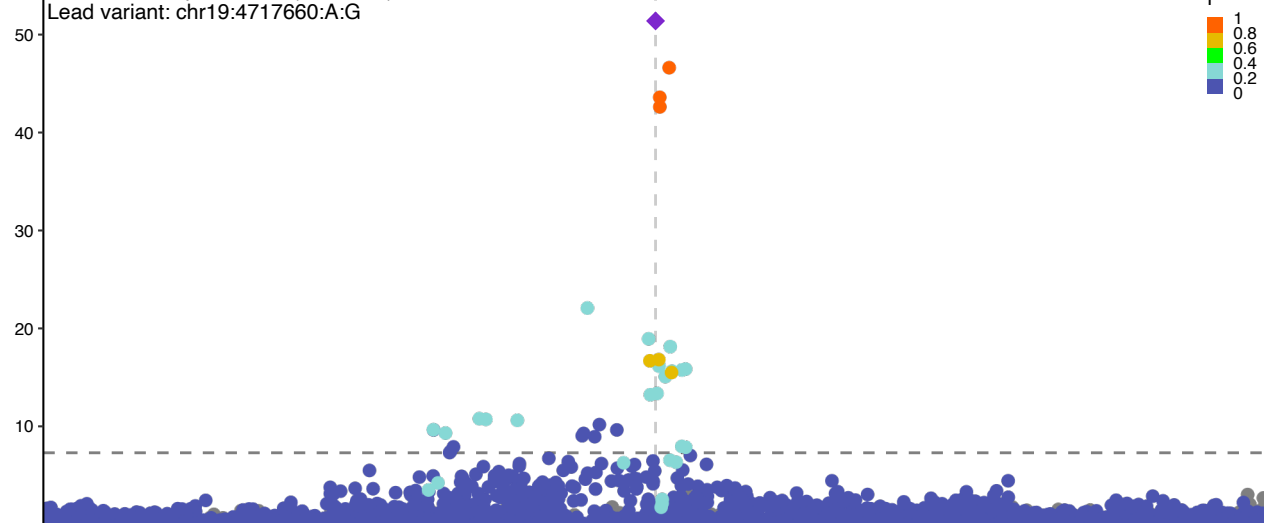

$r^2$

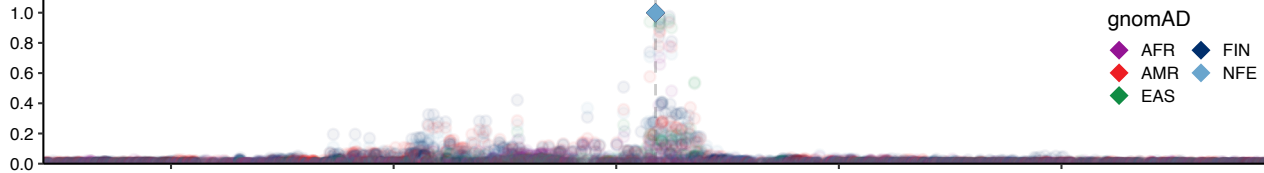

gnomAD

- AFR
- AMR
- EAS
- FIN
- NFE

4500000 4600000 4700000 4800000 4900000

HDGFL2 PLIN4 LRG1 SEMA6B  
PLIN5  
TNFAIP8L1 MYDGF  
DPP9  
FEM1A TICAM1 PLIN3  
ARRDC5 UHRF1

Chromosome 19

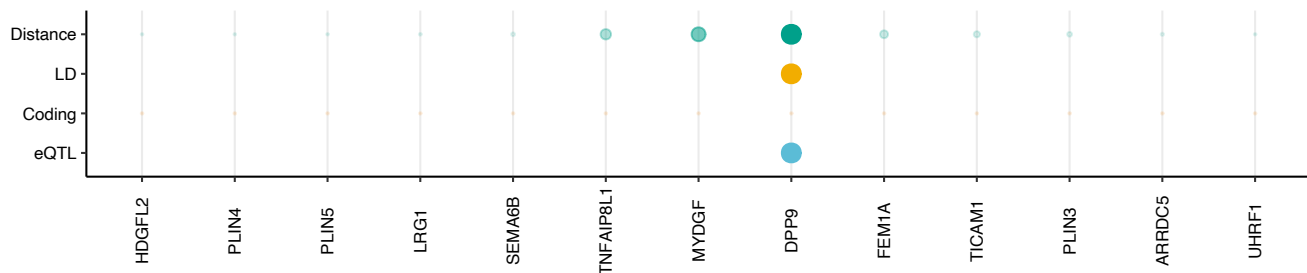

COVID-19 hospitalization (release 7)  
Lead variant: chr19:10352442:G:C

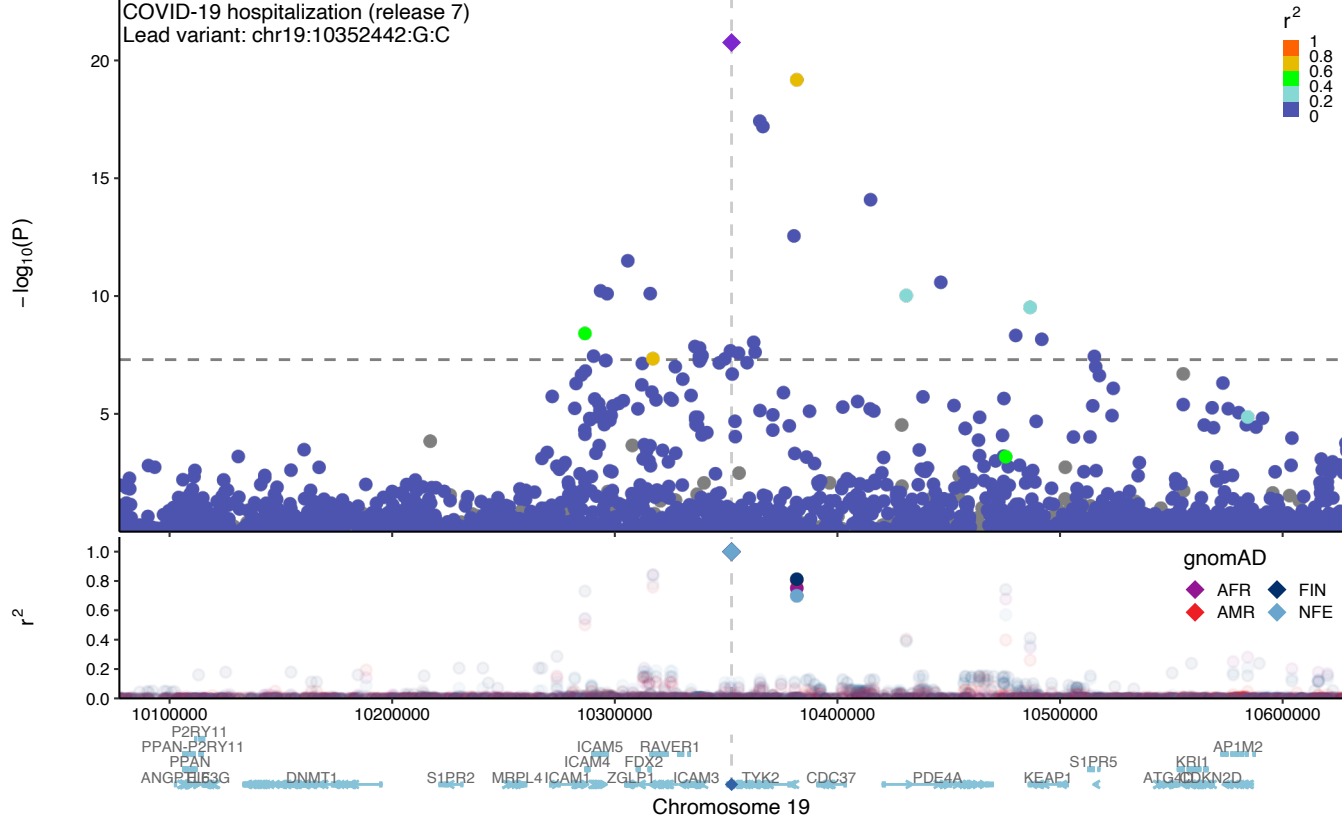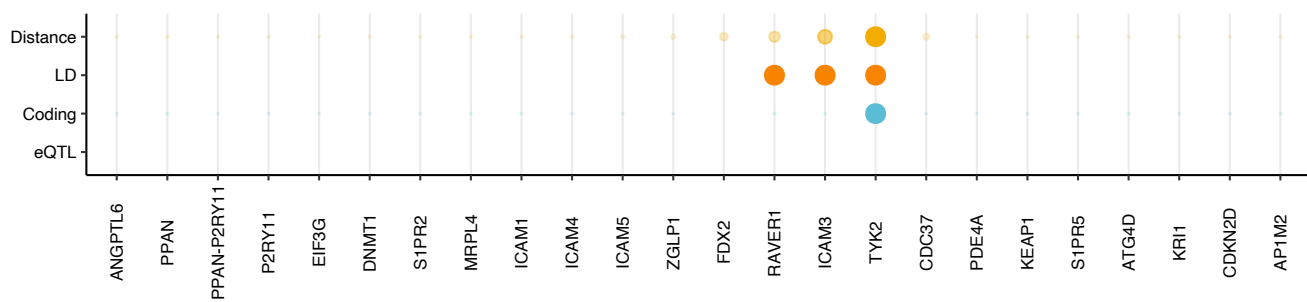

COVID-19 hospitalization (release 7)  
Lead variant: chr19:45869791:ATT:A

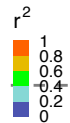

$-\log_{10}(P)$

$r^2$

gnomAD

- AFR (purple diamond)
- AMR (red diamond)
- EAS (green diamond)
- FIN (dark blue diamond)
- NFE (light blue diamond)

Chromosome 19

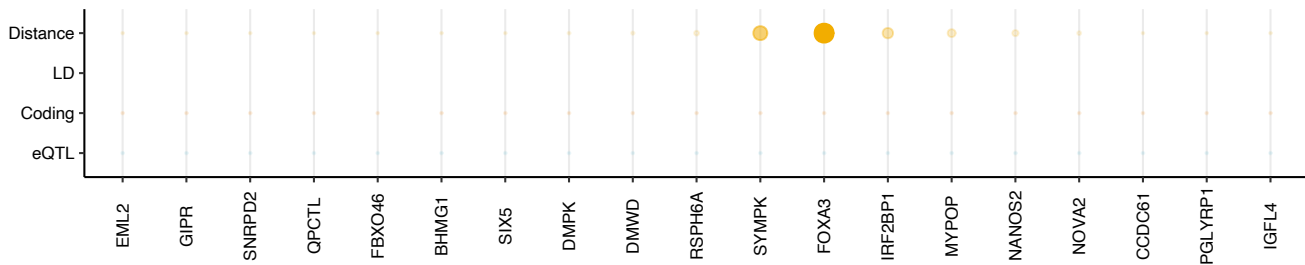

COVID-19 hospitalization (release 7)  
Lead variant: chr19:48702888:G:C



$-\log_{10}(P)$

$r^2$

gnomAD

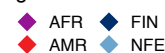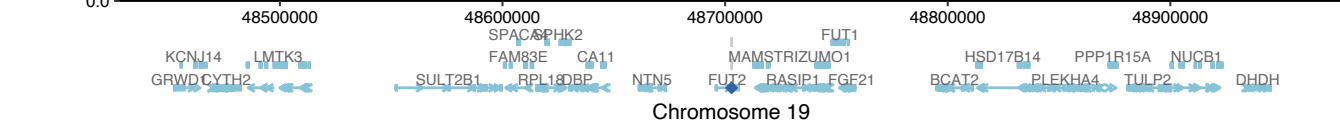

Chromosome 19

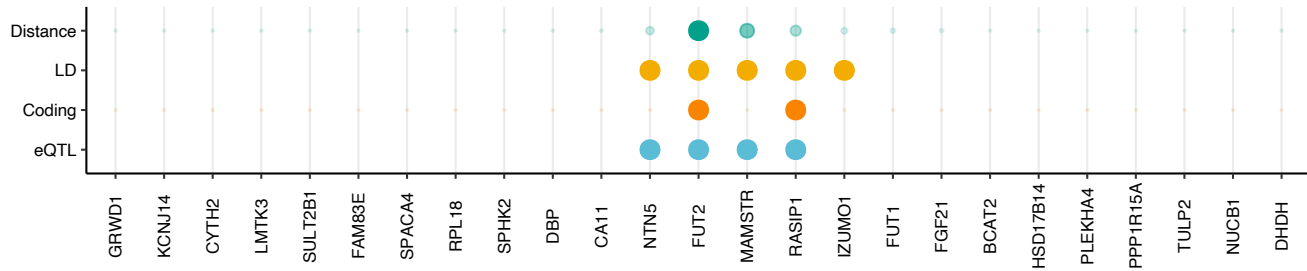

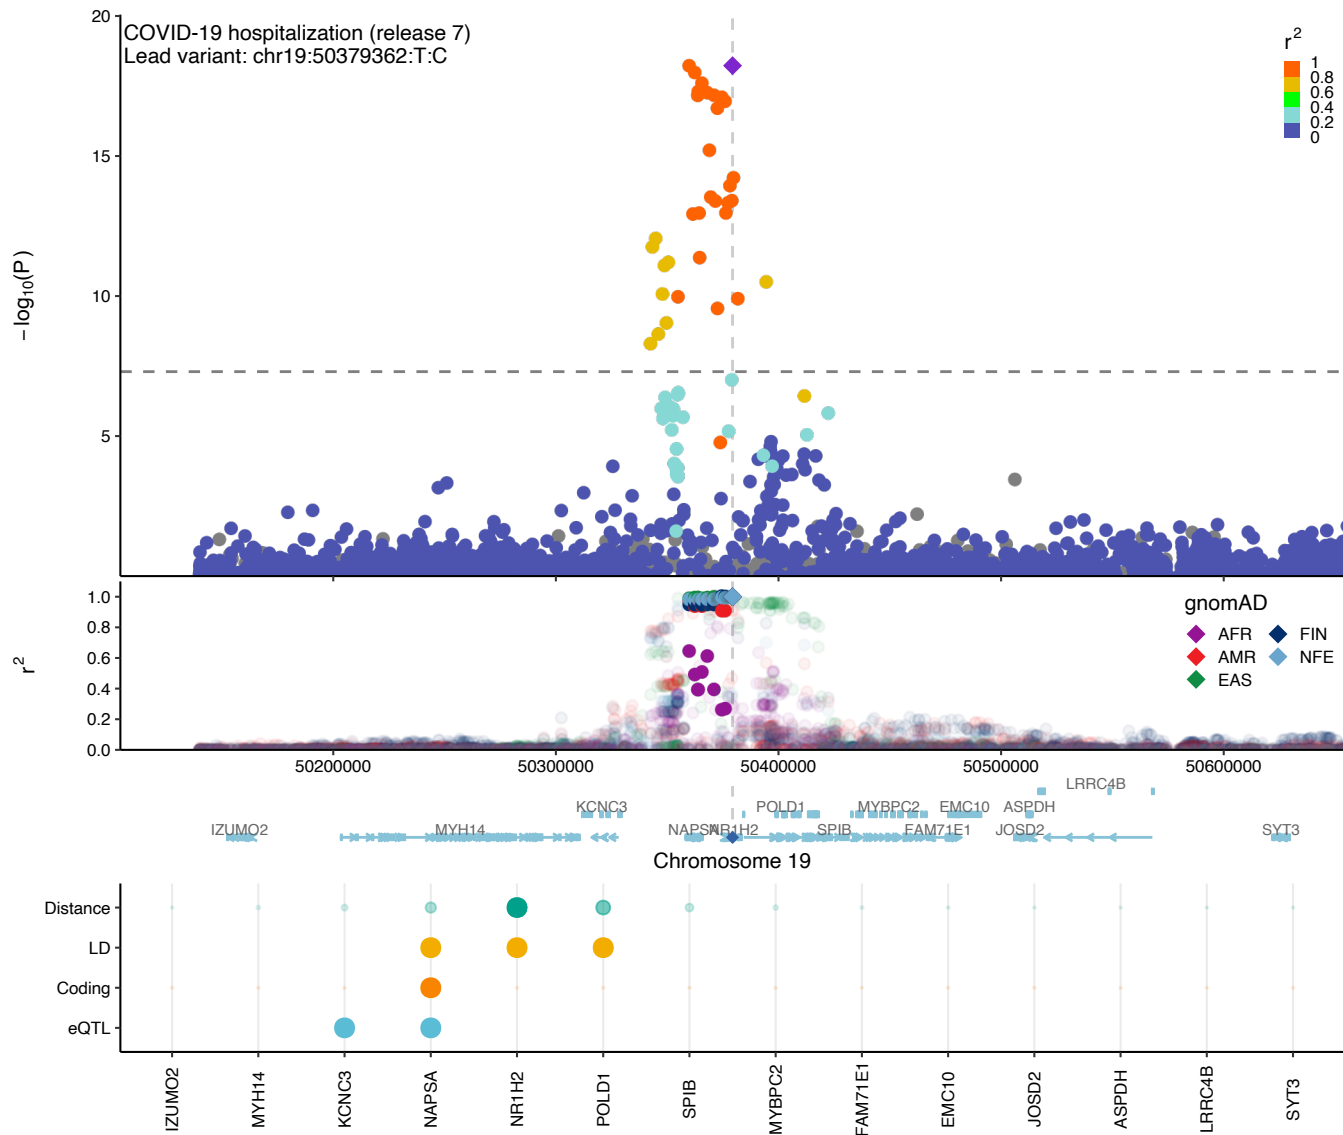

COVID-19 reported infection (release 7)  
Lead variant: chr2:60480453:A:G

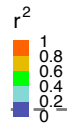

$-\log_{10}(P)$

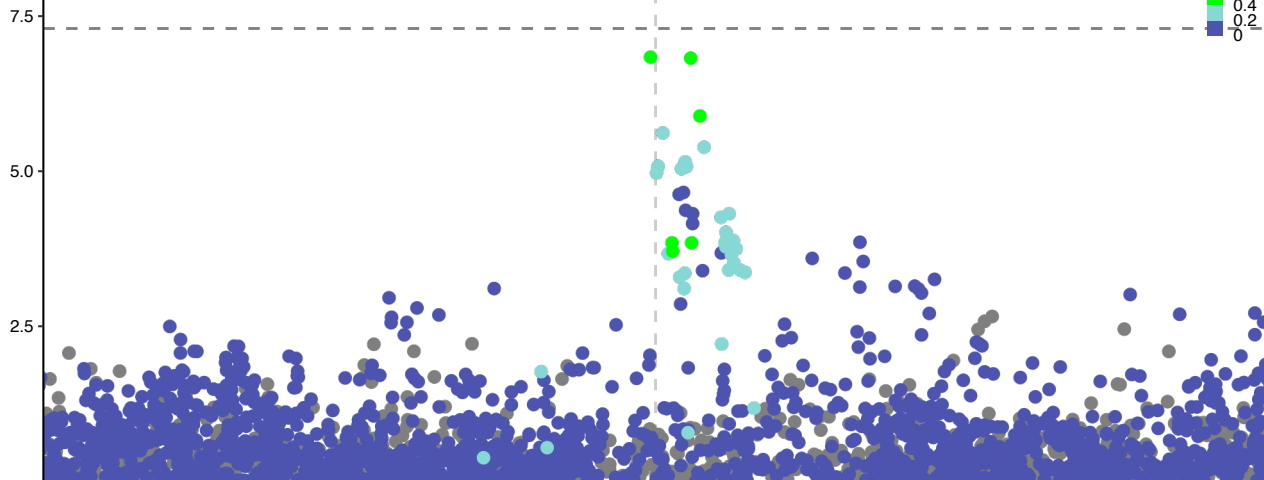

$r^2$

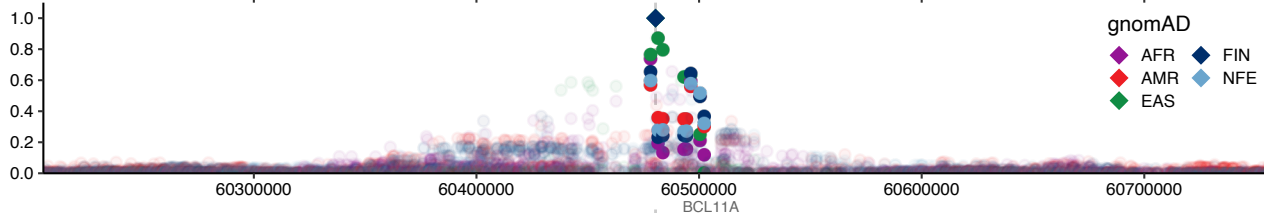

gnomAD

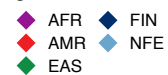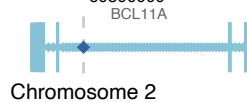

Distance  
LD  
Coding  
eQTL

BCL11A



COVID-19 reported infection (release 7)  
Lead variant: chr3:101647854:G:A



$-\log_{10}(P)$

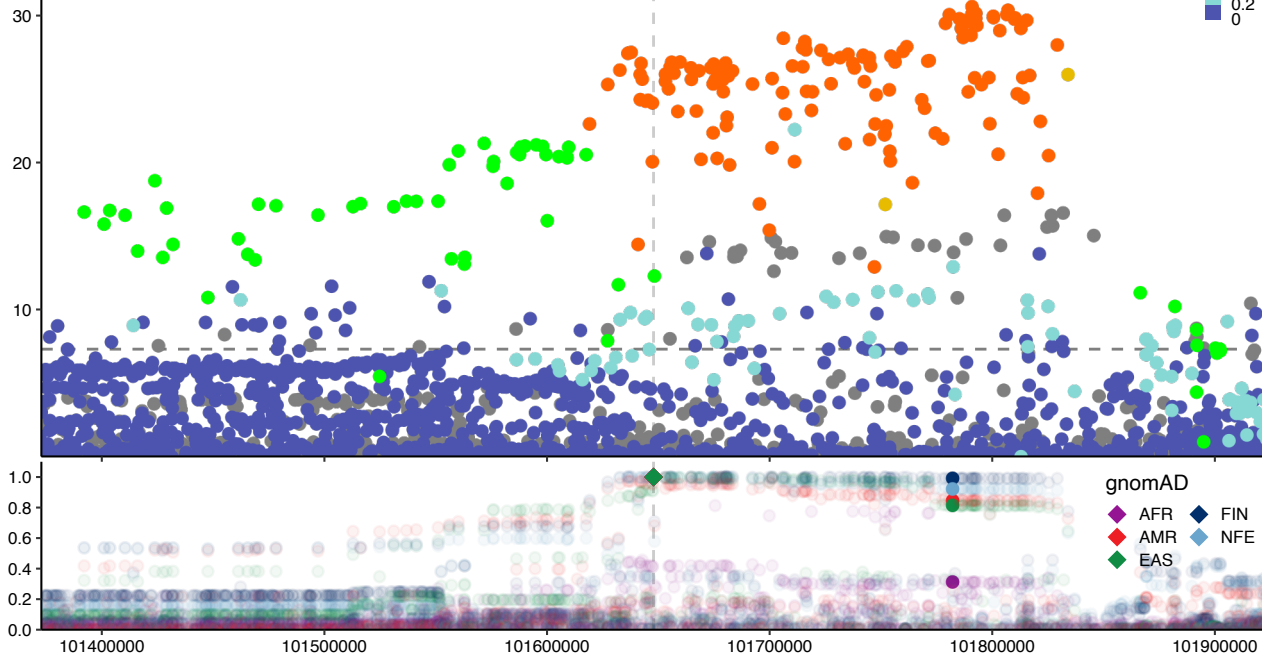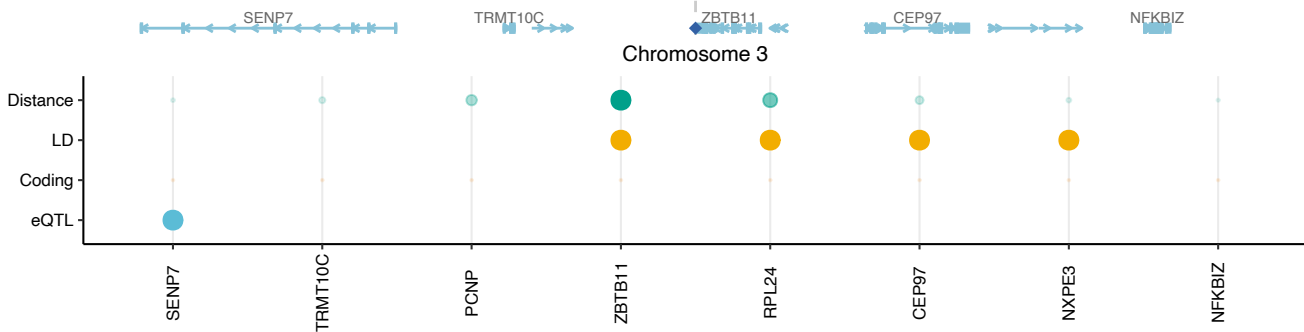

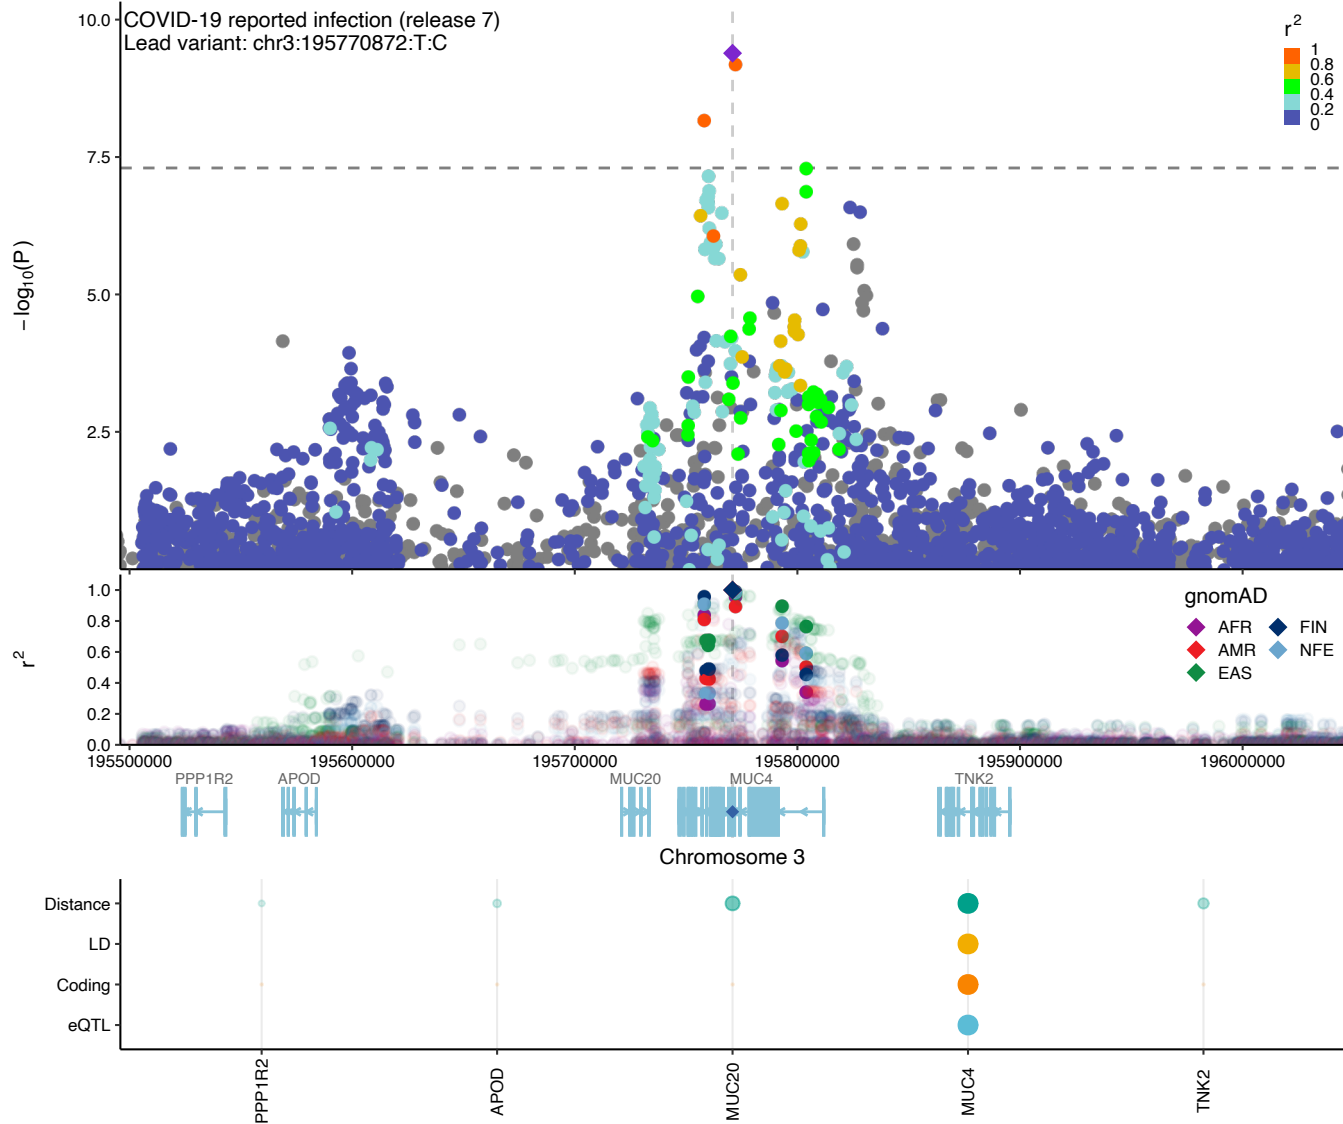

COVID-19 reported infection (release 7)  
Lead variant: chr4:102267552:C:T

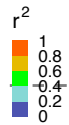

$-\log_{10}(P)$

$r^2$

gnomAD

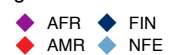

Distance  
LD  
Coding  
eQTL

BANK1

SLC39A8

NFKB1

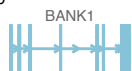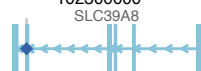

NFKB1

Chromosome 4

COVID-19 reported infection (release 7)  
Lead variant: chr6:41520640:G:A



$-\log_{10}(P)$

15  
10  
5

$r^2$

1.0  
0.8  
0.6  
0.4  
0.2  
0.0

gnomAD

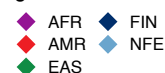

41300000 41400000 41500000 41600000 41700000

TREM1

NCR2

FOXP4

TFEB

FRS3

PGC

Chromosome 6

Distance  
LD  
Coding  
eQTL

TREM1

NCR2

FOXP4

TFEB

PGC

FRS3

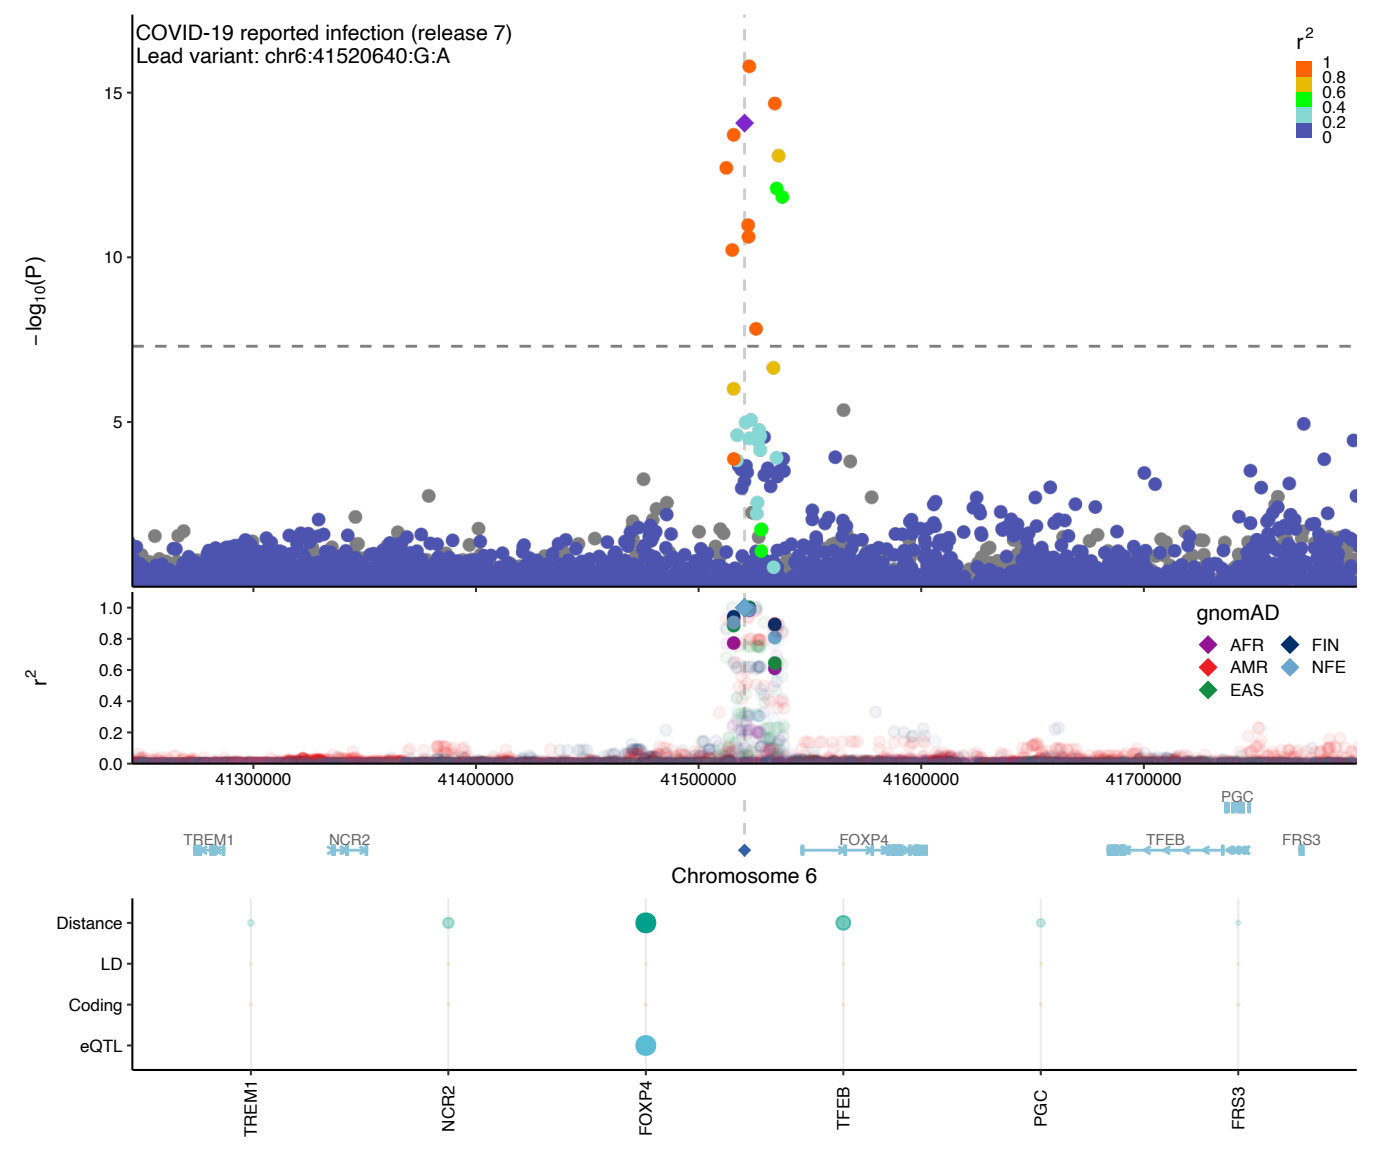

COVID-19 reported infection (release 7)  
Lead variant: chr9:133273813:C:T

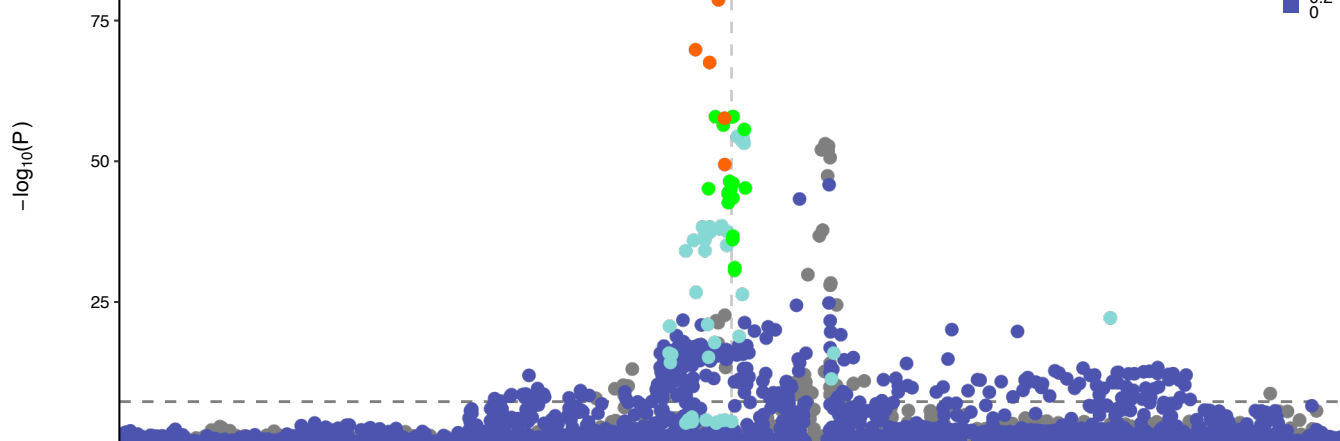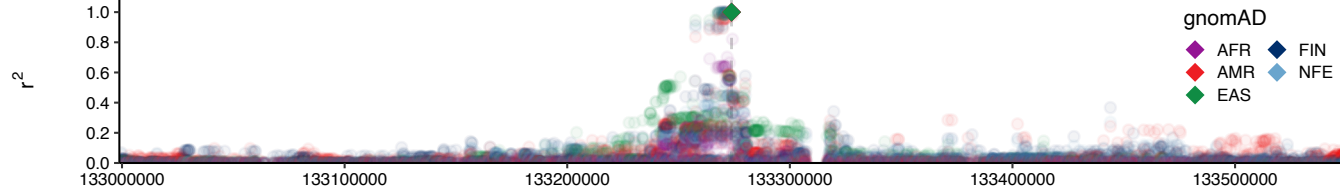

gnomAD

- AFR
- AMR
- EAS
- FIN
- NFE

Chromosome 9

Genes: GTF3C5, CEL, RALGDS, GBGT1, OBP2B, ABO, SURF1, MED22, SURF2, SURF4, STKLD1, REXO4, ADAMTS13, SLC2A6, CACFD1, MYMK.

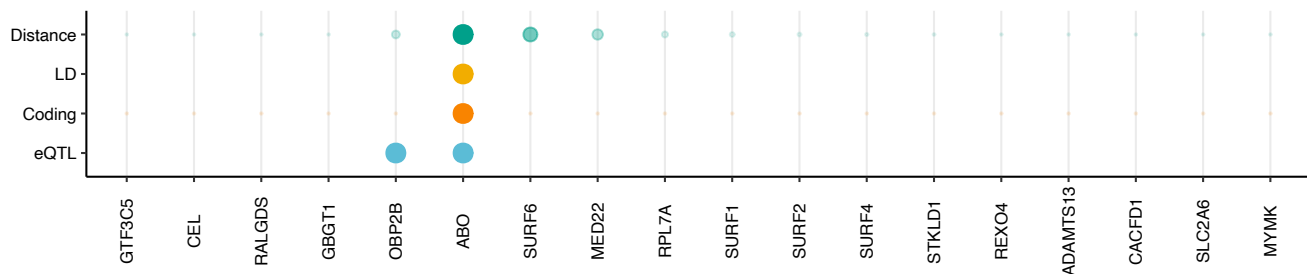

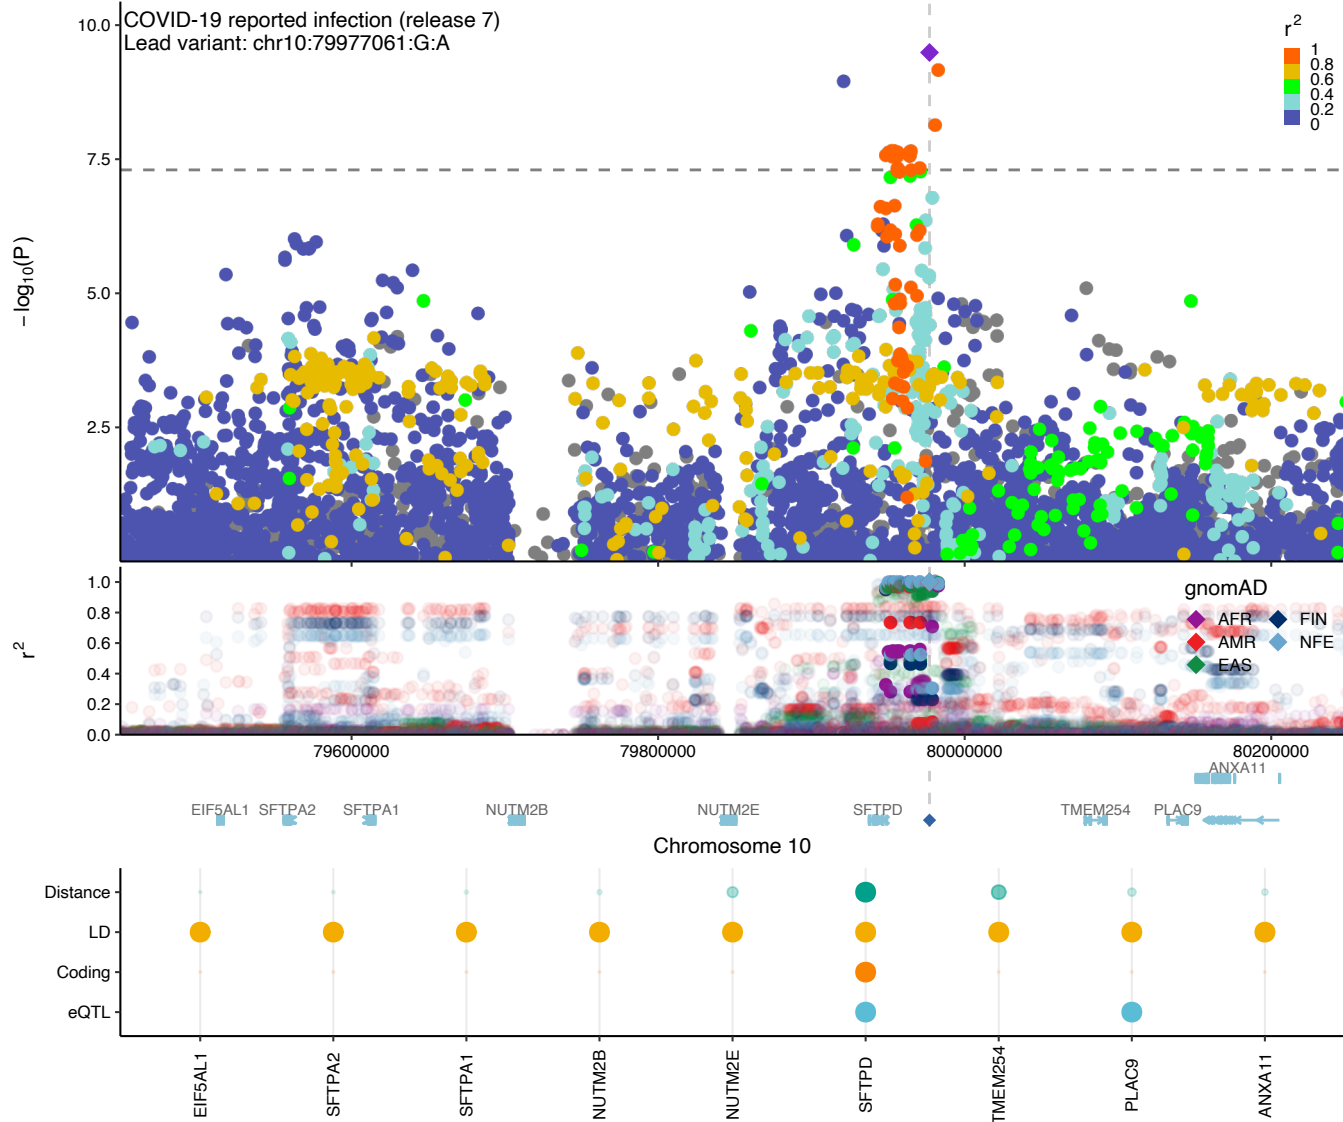

COVID-19 reported infection (release 7)  
Lead variant: chr11:34480495:C:T

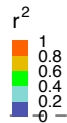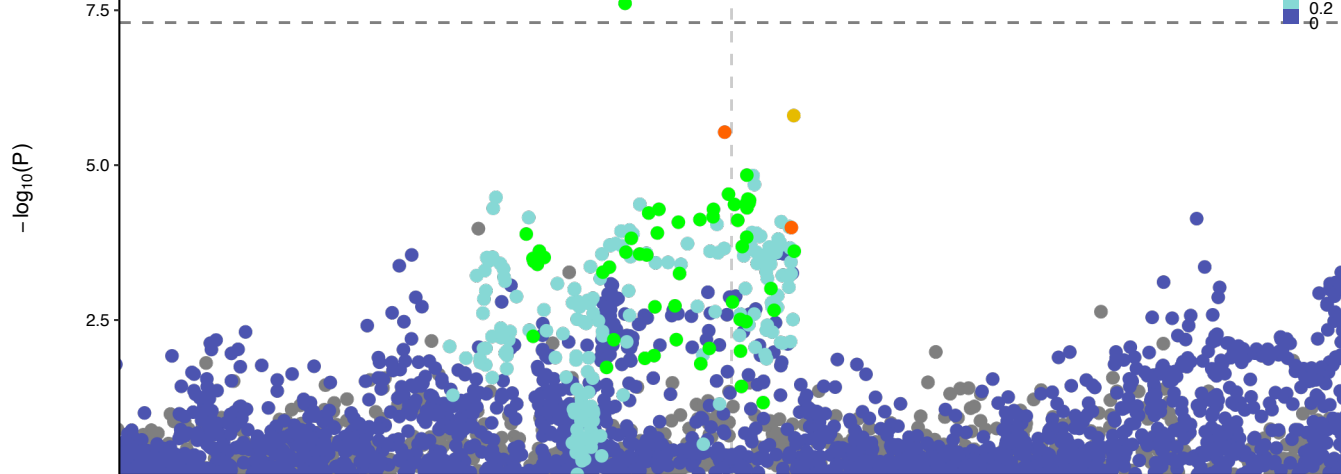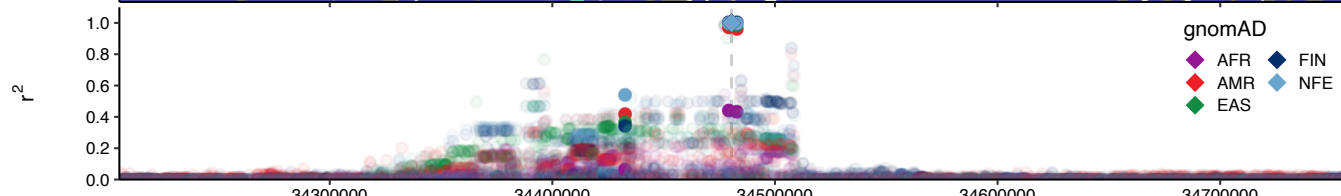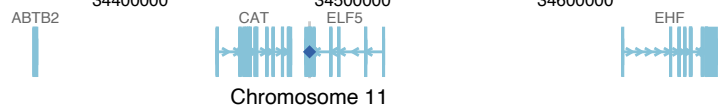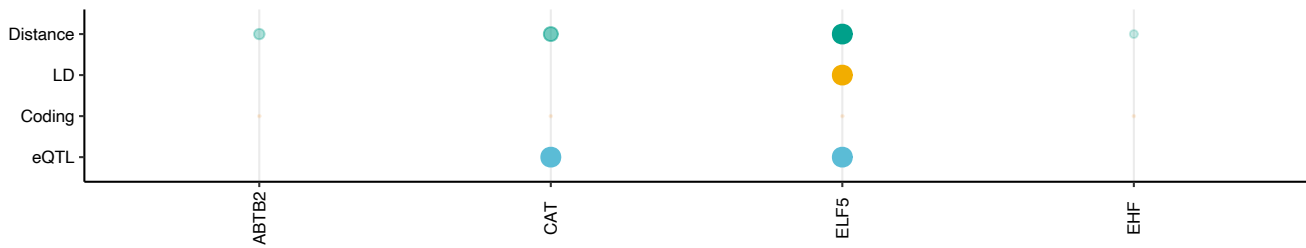

COVID-19 reported infection (release 7)  
Lead variant: chr12:112922758:T:C



$-\log_{10}(P)$

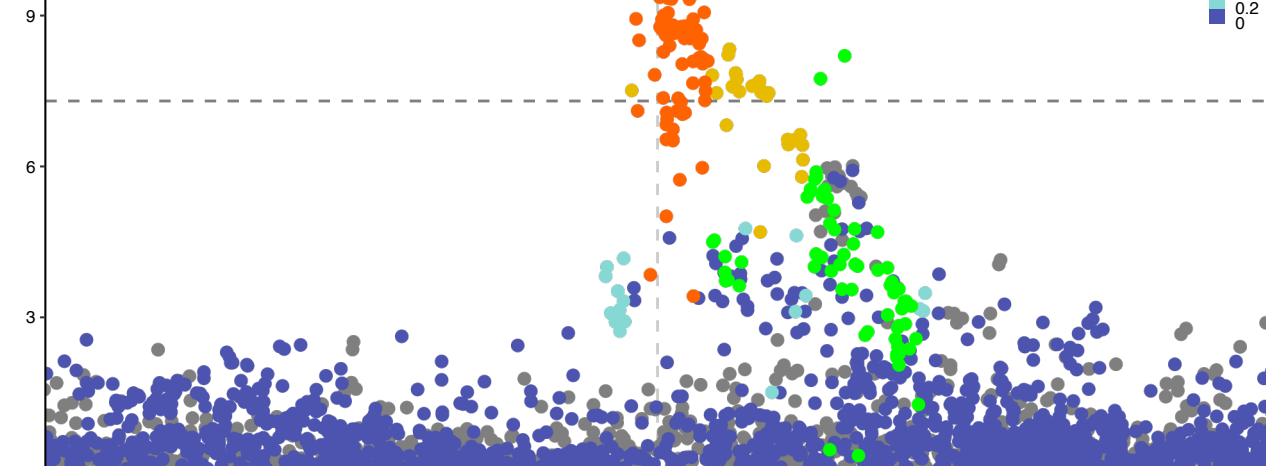

$r^2$

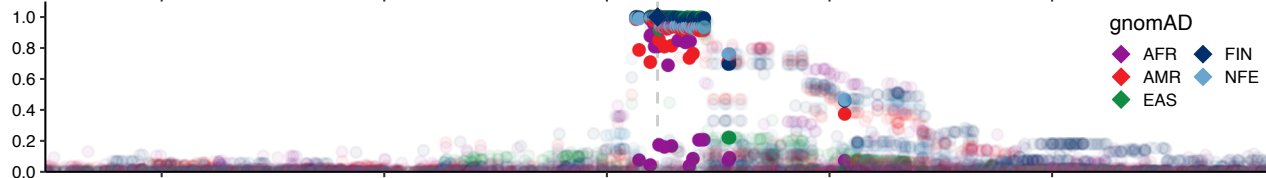

gnomAD

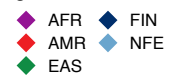

112700000

112800000

112900000

113000000

113100000

RASAL1

DDX54

RPH3A

OAS1

OAS3

DTX1

CFAP73

Chromosome 12

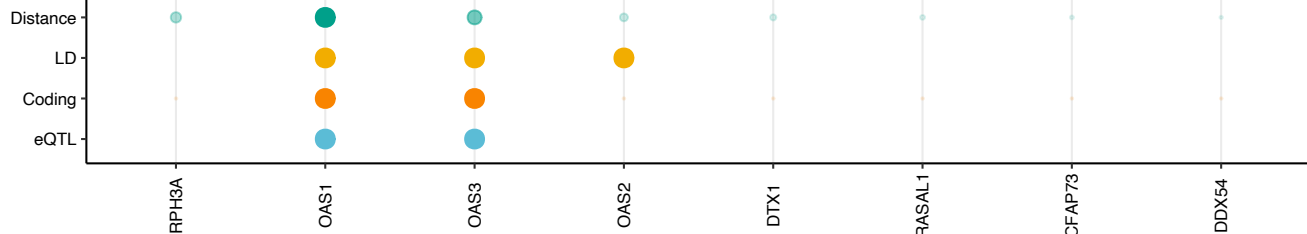



COVID-19 reported infection (release 7)  
Lead variant: chr14:28990028:A:G



$-\log_{10}(P)$

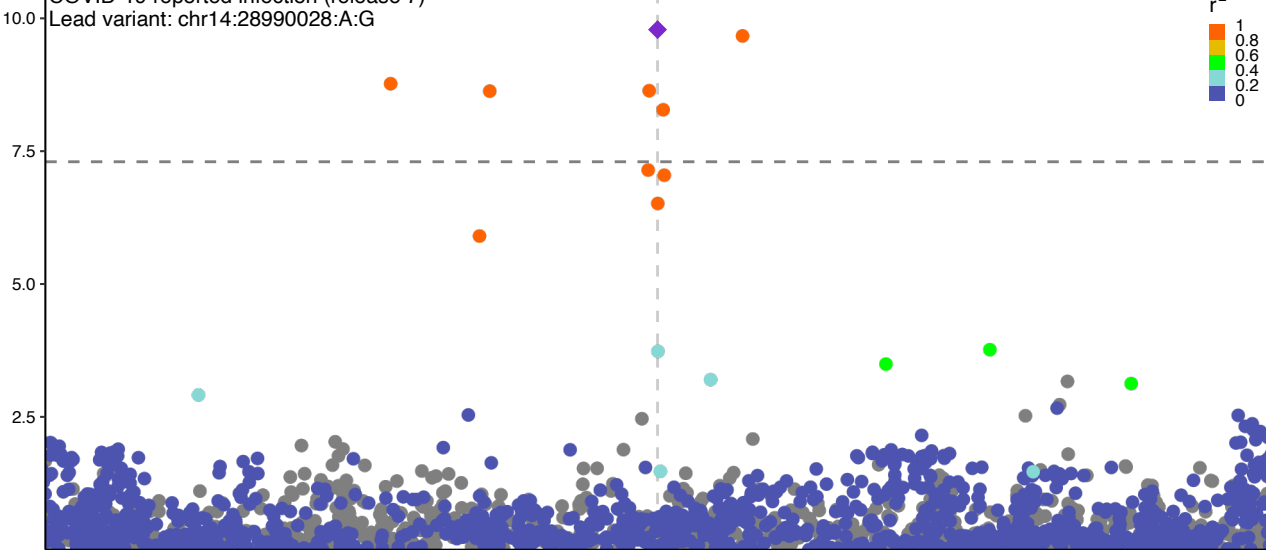

$r^2$

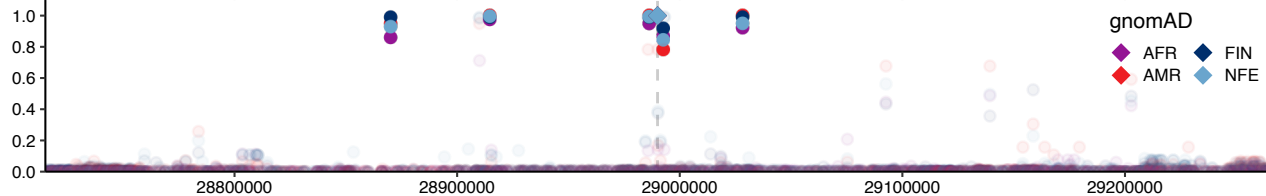

FOXG1

Chromosome 14

Distance  
LD  
Coding  
eQTL

FOXG1

COVID-19 reported infection (release 7)  
Lead variant: chr17:39990289:C:G

$r^2$

1  
0.8  
0.6  
0.4  
0.2  
0

$-\log_{10}(P)$

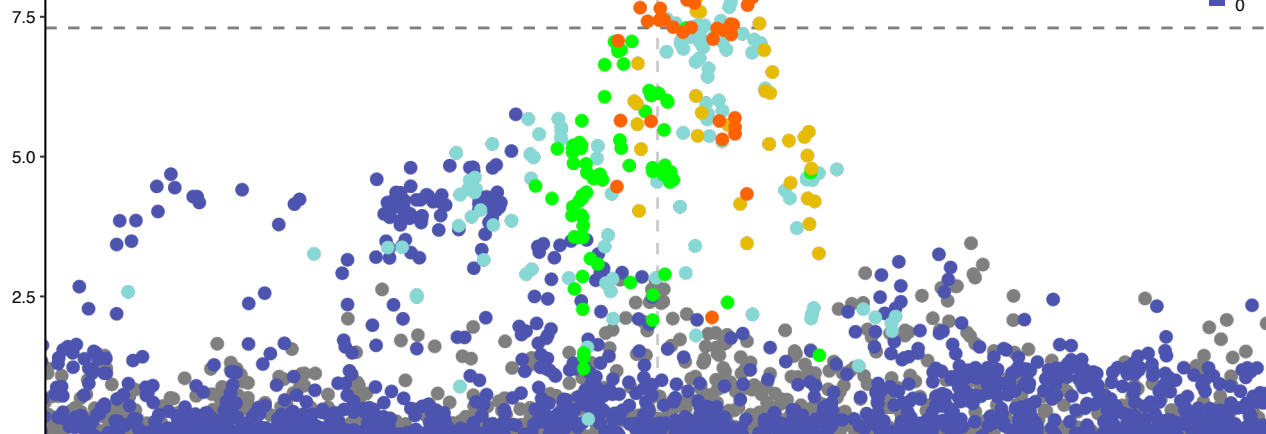

$r^2$

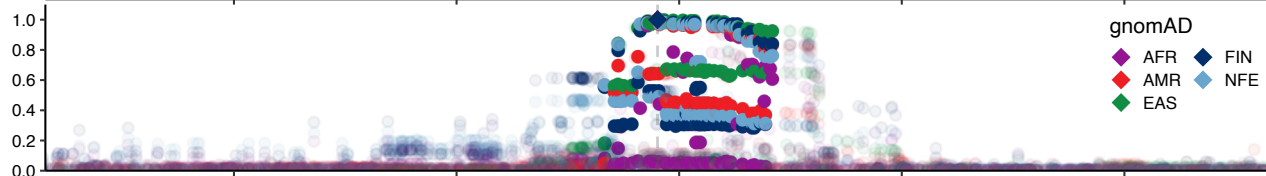

gnomAD

AFR  
AMR  
EAS  
FIN  
NFE

398000000 399000000 399900000 400000000 401000000 402000000

ZBPB2 ORMDL3 PSMD3 MED24 NR1D1 CASC3

GRB7 IKZF3 ZBPB2 GSDMB LRRC3C GSDMA CSF3 THRA MSL1 RAPGEFL1 WIPF2

Chromosome 17

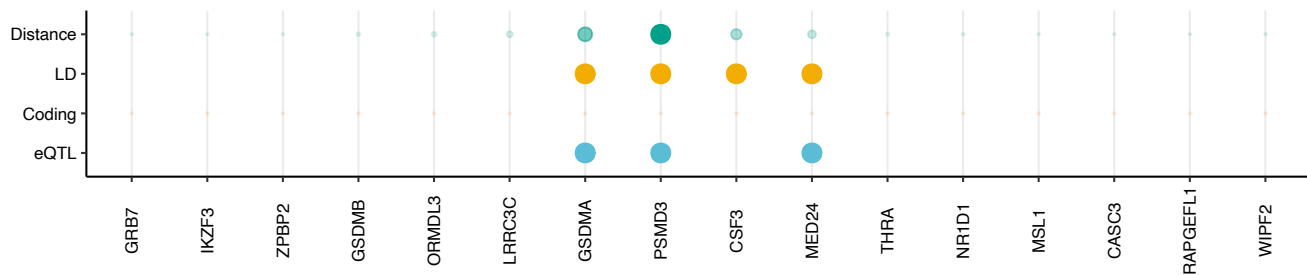

COVID-19 reported infection (release 7)  
Lead variant: chr19:4717660:A:G

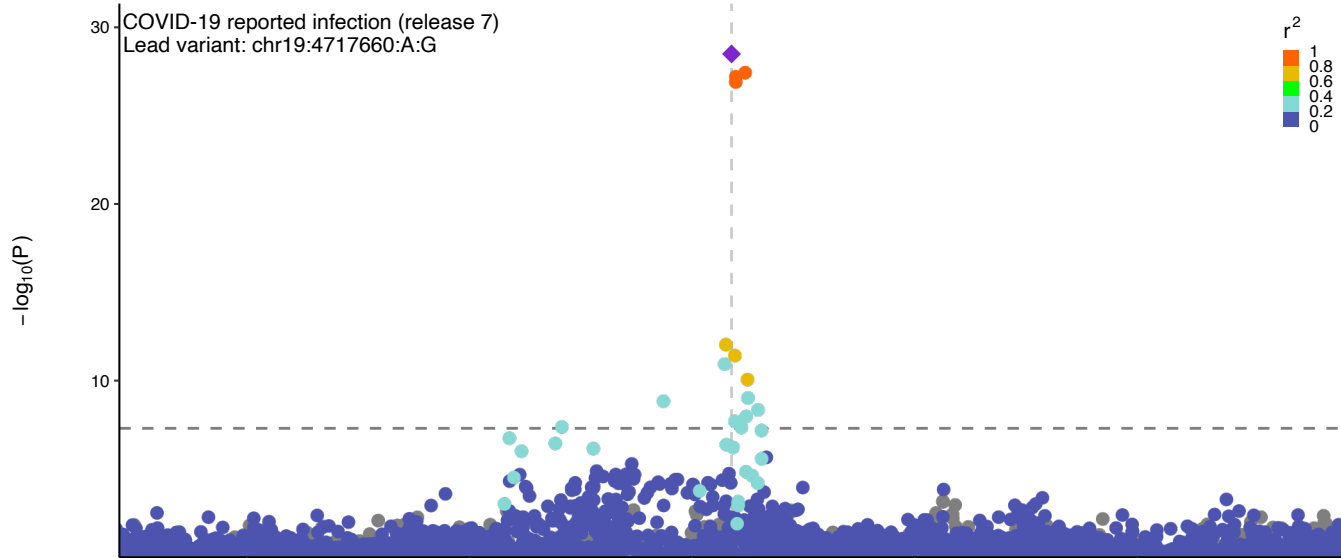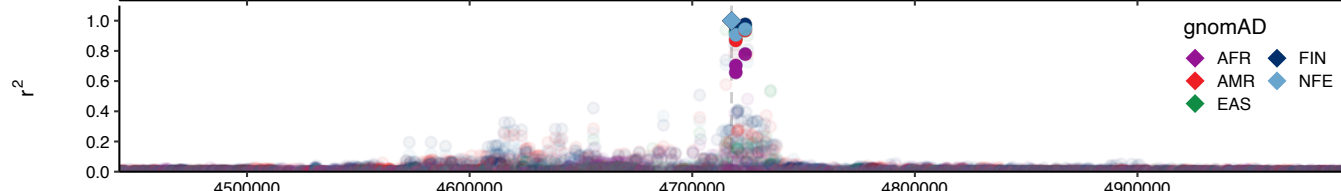

gnomAD  
AFR  
AMR  
EAS  
FIN  
NFE

HDGFL2 PLIN4 PLIN5 LRG1 SEMA6B TNFAIP8L1 MYDGF DPP9 FEM1A TICAM1 PLIN3 ARDC5 UHRF1

Chromosome 19

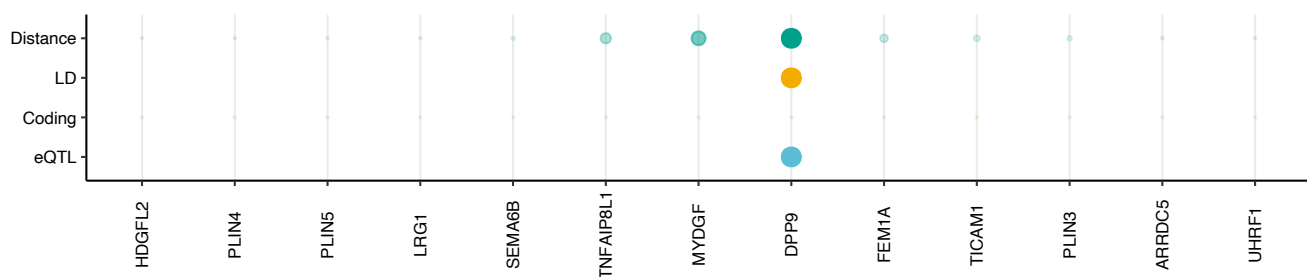

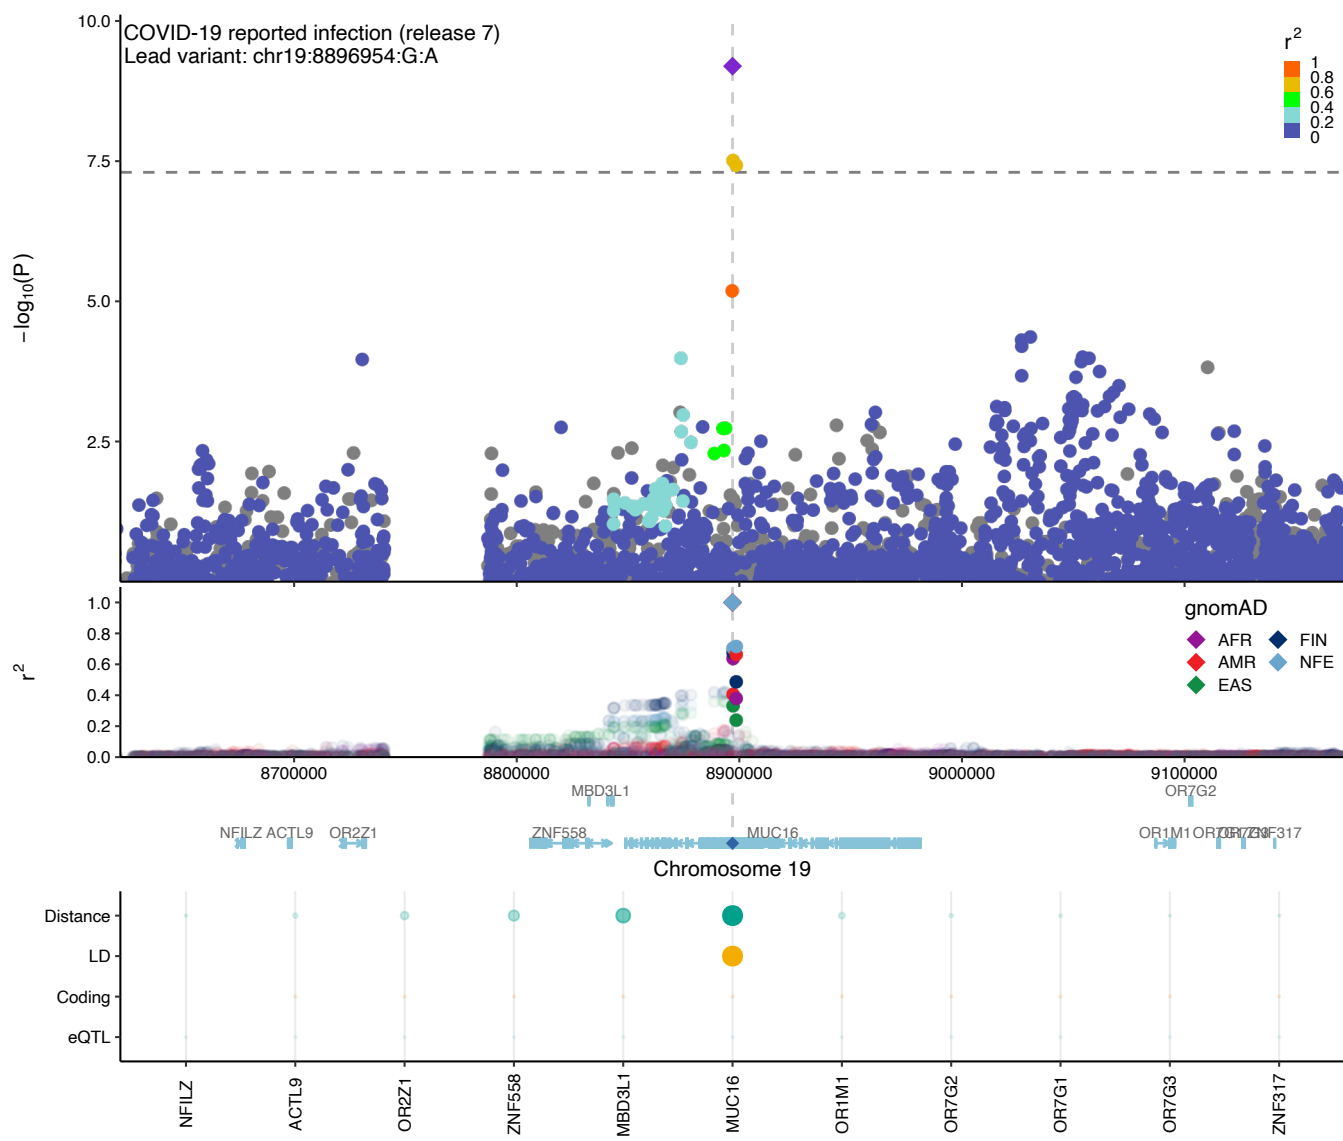

COVID-19 reported infection (release 7)  
Lead variant: chr19:48702888:G:C



$-\log_{10}(P)$

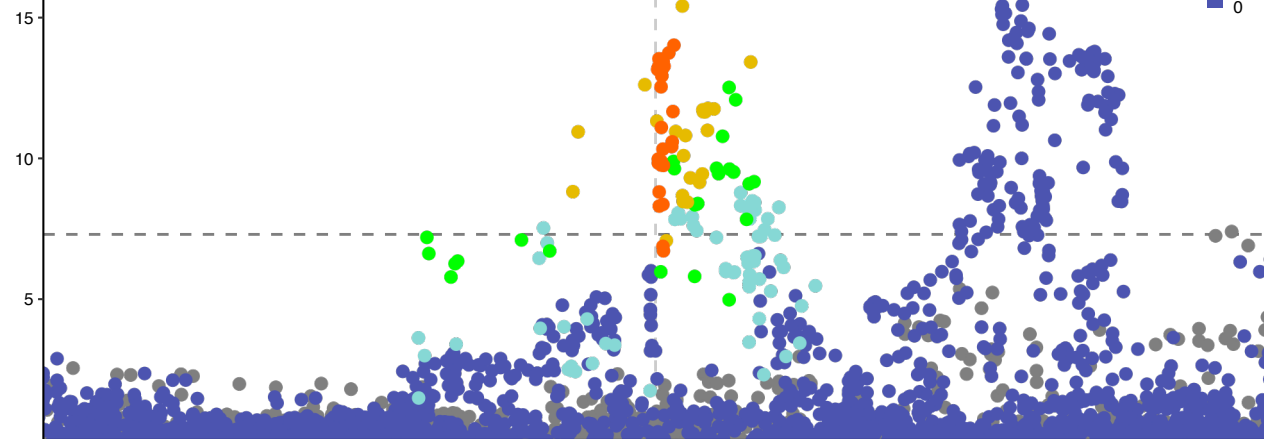

$r^2$

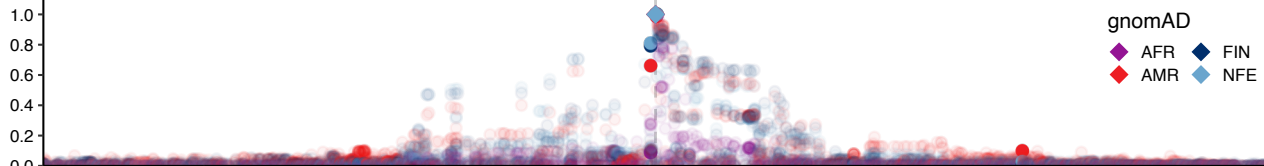

gnomAD

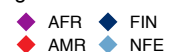

48500000 48600000 48700000 48800000 48900000

KCNJ14 LMTK3 SPACA4 SPHK2 CA11 FUT1  
GRWD CYTH2 SULT2B1 RPL18 DBP NTN5 FUT2 BASIP1 EGF21  
HSD17B14 PPP1R15A NUCB1  
BCAT2 PLEKHA4 TULP2 DHDH

Chromosome 19

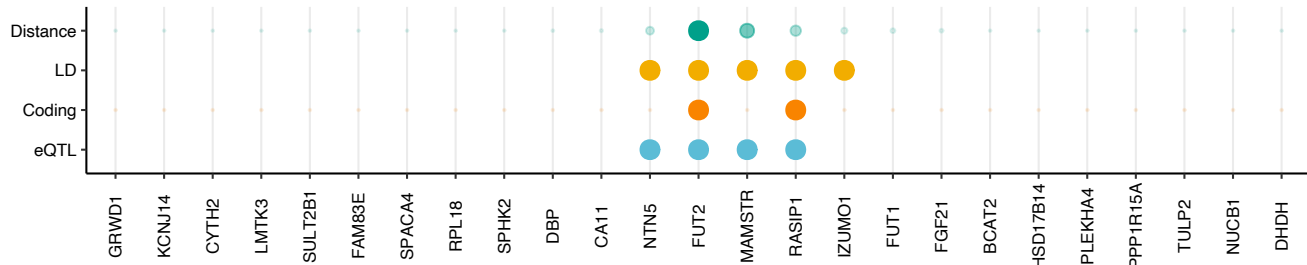

COVID-19 reported infection (release 7)  
Lead variant: chr19:50379362:T:C



$-\log_{10}(P)$

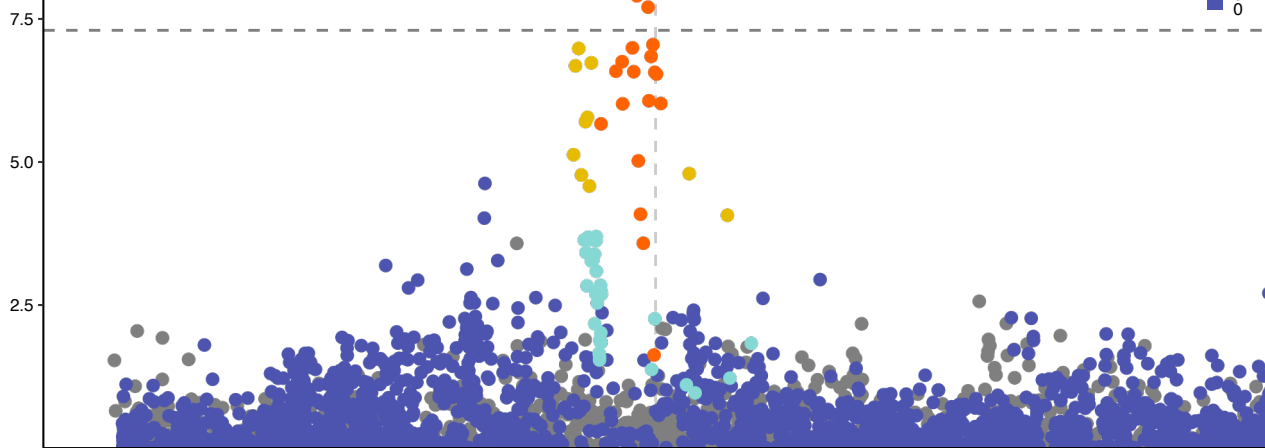

$r^2$

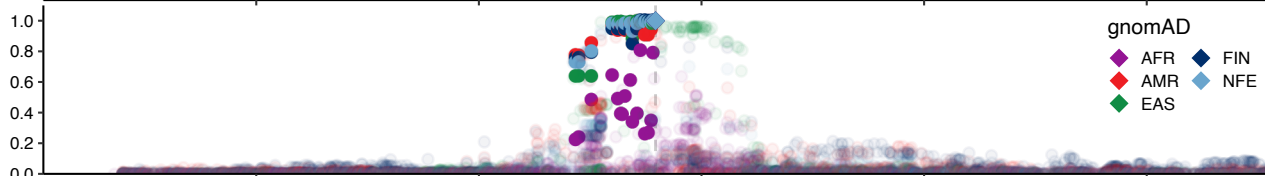

gnomAD

Legend for gnomAD populations:

- AFR (purple diamond)
- AMR (red diamond)
- EAS (green diamond)
- FIN (dark blue diamond)
- NFE (light blue diamond)

50200000

50300000

50400000

50500000

50600000

IZUMO2

MYH14

KCNK3

NAPSA

NR1H2

POLD1

SPIB

MYBPC2

FAM71E1

EMC10

ASPDH

JOSD2

LRRC4B

SYT3

Chromosome 19

Distance

LD

Coding

eQTL

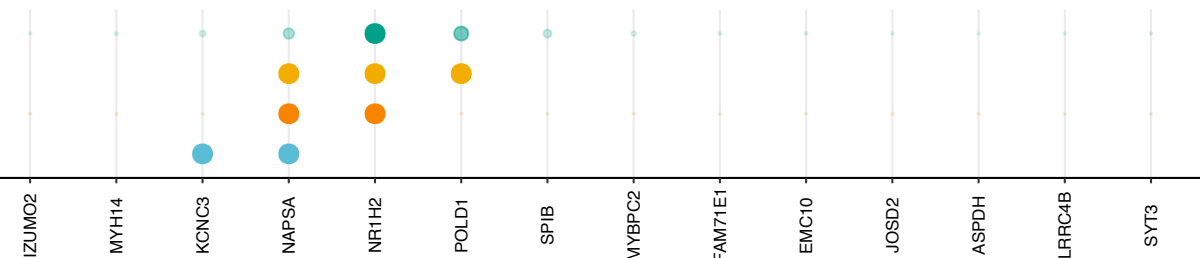

COVID-19 reported infection (release 7)  
Lead variant: chrX:15602217:T:C

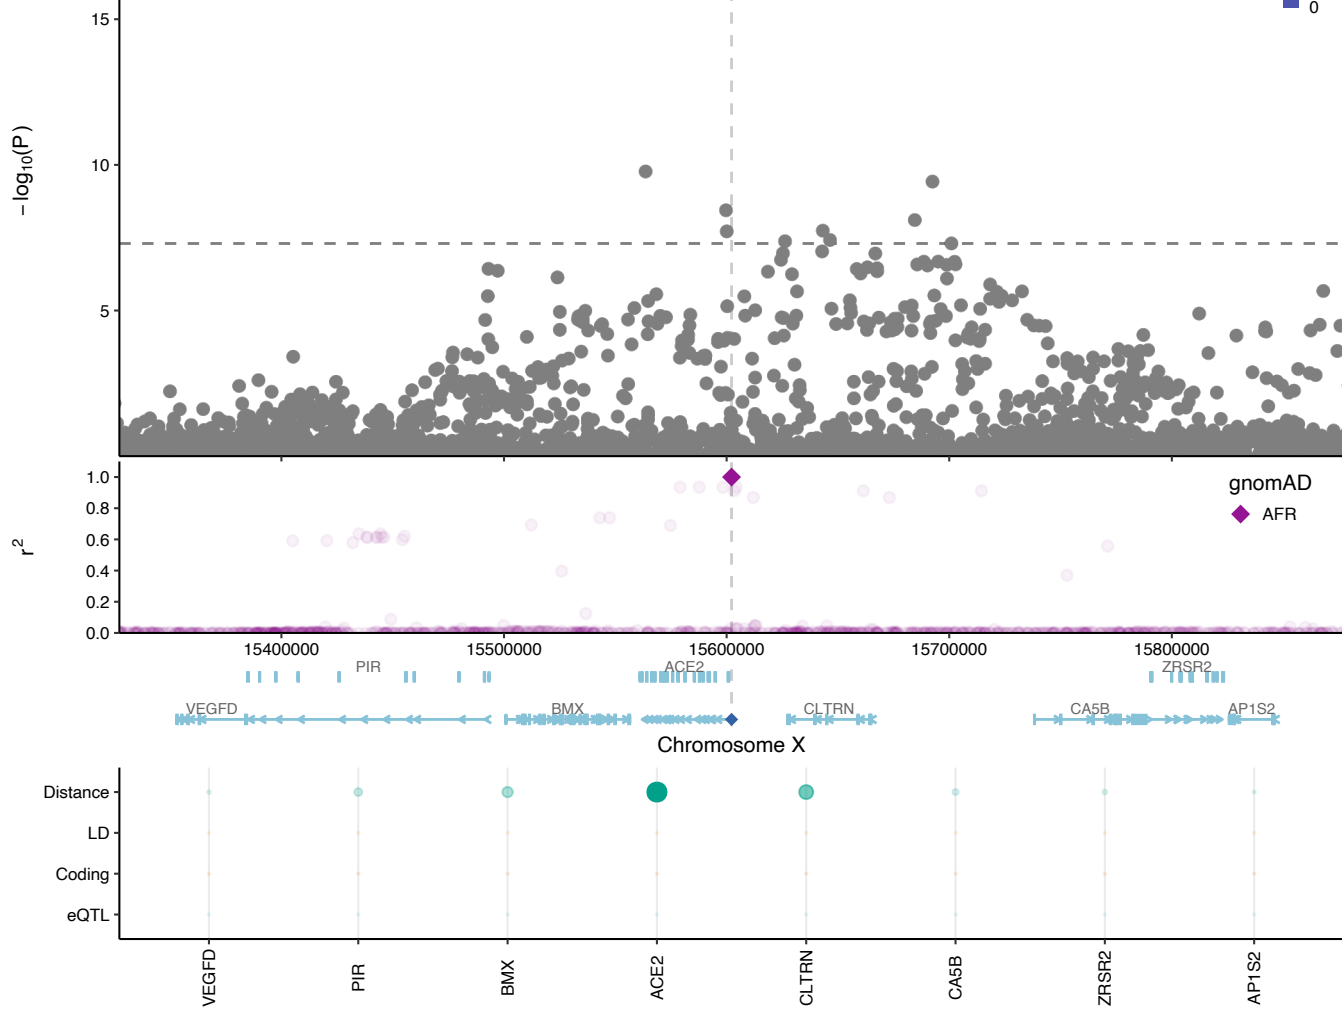

Supplement: MOESM3 [file 41586_2023_6355_MOESM3_ESM.pdf › 41586_2023_6355_MOESM3_ESM.pdf]
